# Supplementary material for: Comparative Transcriptome Profiling of mRNA and lncRNA of Ovaries in High and Low Egg Production Performance in Domestic Pigeons (Columba livia)
Source: Front Genet. 2021 Mar 23;12:571325. doi: 10.3389/fgene.2021.571325 (PMC8021926; doi:10.3389/fgene.2021.571325)
Supplement: Supplementary Table 3 — The information for the identified lncRNAs. [file Table_3.XLSX]

## Sheet: Sheet1
Supplymentary Table S3 The information for the identified lncRNAs.
class_code	Known/Novel	CPC_Score	CNCI_Score	chr	strand	start	end	t_name	num_exons	length	gene_id
u	novel	0.0548291	-0.024576	NW_004973171.1	.	1	702	MSTRG.1.1	1	702	MSTRG.1
x	novel	0.0117316	-0.057344	NW_004973190.1	+	1595766	1601376	MSTRG.1000.1	2	215	MSTRG.1000
u	novel	0.00607192	-0.098304	NW_004973330.1	.	43676	44360	MSTRG.10001.1	1	685	MSTRG.10001
u	novel	0.0881373	-0.0647168	NW_004973330.1	.	791864	792087	MSTRG.10002.1	1	224	MSTRG.10002
u	novel	0.0102543	-0.289997	NW_004973330.1	.	1531724	1531943	MSTRG.10008.1	1	220	MSTRG.10008
i	novel	0.327723	-0.0139264	NW_004973330.1	+	1505929	1527793	MSTRG.10015.2	2	2660	MSTRG.10015
i	novel	0.0486272	-0.0585728	NW_004973330.1	+	1527862	1530609	MSTRG.10016.1	2	2672	MSTRG.10016
j	novel	0.358397	-0.0155648	NW_004973330.1	-	1813562	1863734	MSTRG.10020.3	3	7084	MSTRG.10020
u	novel	0.289121	-0.0249856	NW_004973330.1	+	1919914	1924431	MSTRG.10022.1	2	3252	MSTRG.10022
x	novel	0.0853198	-0.098304	NW_004973330.1	-	1999066	2000244	MSTRG.10025.1	2	1136	MSTRG.10025
u	novel	0.0201519	-0.0004096	NW_004973330.1	+	2005518	2006079	MSTRG.10026.1	2	489	MSTRG.10026
j	novel	0.0797103	-0.004096	NW_004973330.1	-	2016221	2025609	MSTRG.10027.1	8	771	MSTRG.10027
j	novel	0.215792	-0.0749568	NW_004973330.1	-	2016506	2024926	MSTRG.10027.2	8	484	MSTRG.10027
x	novel	0.0895658	-0.0487424	NW_004973330.1	-	2105131	2108503	MSTRG.10031.1	3	3180	MSTRG.10031
x	novel	0.0688504	-0.049152	NW_004973330.1	-	2105134	2108503	MSTRG.10031.2	4	3153	MSTRG.10031
u	novel	0.0648773	-0.0004096	NW_004973331.1	.	17128	17331	MSTRG.10040.1	1	204	MSTRG.10040
o	novel	0.13275	-0.0438272	NW_004973332.1	-	49059	323506	MSTRG.10044.1	2	334	MSTRG.10044
i	novel	0.0405766	-0.196608	NW_004973332.1	+	66412	67871	MSTRG.10046.1	1	1460	MSTRG.10046
u	novel	0.322939	-0.274432	NW_004973332.1	+	262011	267010	MSTRG.10051.1	2	4889	MSTRG.10051
i	novel	0.00538433	-0.294912	NW_004973332.1	.	276674	277072	MSTRG.10054.1	1	399	MSTRG.10054
o	novel	0.101782	-0.0720896	NW_004973332.1	+	284693	323509	MSTRG.10056.1	2	398	MSTRG.10056
u	novel	0.285414	-0.004096	NW_004973332.1	-	305879	307707	MSTRG.10058.1	1	1829	MSTRG.10058
u	novel	0.0484598	-0.02048	NW_004973332.1	.	311887	313272	MSTRG.10059.1	1	1386	MSTRG.10059
u	novel	0.0336107	-0.038912	NW_004973332.1	-	315766	316518	MSTRG.10060.1	1	753	MSTRG.10060
u	novel	0.0365858	-0.0126976	NW_004973332.1	-	317937	321677	MSTRG.10061.1	2	3665	MSTRG.10061
o	novel	0.278303	-0.0004096	NW_004973333.1	+	21322	23343	MSTRG.10064.1	2	1245	MSTRG.10064
i	novel	0.00540967	-0.0114688	NW_004973333.1	-	27644	27962	MSTRG.10065.1	1	319	MSTRG.10065
j	novel	0.391247	-0.0585728	NW_004973333.1	-	103374	134302	MSTRG.10069.1	5	7077	MSTRG.10069
o	novel	0.249728	-0.0376832	NW_004973333.1	-	120376	124993	MSTRG.10069.3	3	3548	MSTRG.10069
o	novel	0.031238	-0.028672	NW_004973333.1	-	125096	130855	MSTRG.10069.6	2	3075	MSTRG.10069
u	novel	0.34659	-0.0172032	NW_004973333.1	+	117985	120430	MSTRG.10070.1	2	2397	MSTRG.10070
i	novel	0.0151513	-0.172032	NW_004973333.1	-	466782	468790	MSTRG.10072.1	3	491	MSTRG.10072
u	novel	0.0742575	-0.0151552	NW_004973333.1	+	265556	267500	MSTRG.10079.1	1	1945	MSTRG.10079
i	novel	0.0101583	-0.0299008	NW_004973333.1	.	659143	659500	MSTRG.10086.1	1	358	MSTRG.10086
o	novel	0.00413058	-0.0221184	NW_004973333.1	+	686552	726719	MSTRG.10088.1	2	267	MSTRG.10088
i	novel	0.0722547	-0.049152	NW_004973333.1	-	731752	732055	MSTRG.10090.1	1	304	MSTRG.10090
o	novel	0.0599621	-0.120013	NW_004973333.1	+	735788	765981	MSTRG.10091.1	2	351	MSTRG.10091
j	novel	0.038531	-0.0004096	NW_004973333.1	+	807891	903783	MSTRG.10094.7	4	3498	MSTRG.10094
j	novel	0.0951608	-0.0004096	NW_004973333.1	+	807891	885936	MSTRG.10094.8	3	1184	MSTRG.10094
o	novel	0.0232062	-0.0708608	NW_004973333.1	-	845682	1033711	MSTRG.10095.1	2	668	MSTRG.10095
i	novel	0.0584647	-0.0004096	NW_004973333.1	+	850776	852024	MSTRG.10096.1	1	1249	MSTRG.10096
j	novel	0.0661561	-0.065536	NW_004973333.1	-	968311	970530	MSTRG.10100.8	2	996	MSTRG.10100
u	novel	0.062395	-0.002048	NW_004973333.1	-	1124639	1128842	MSTRG.10106.1	2	2130	MSTRG.10106
i	novel	0.0472534	-0.047104	NW_004973333.1	-	1162401	1174409	MSTRG.10108.1	2	2079	MSTRG.10108
i	novel	0.0162795	-0.0004096	NW_004973333.1	-	1220956	1221212	MSTRG.10109.1	1	257	MSTRG.10109
j	novel	0.203529	-0.0344064	NW_004973333.1	-	1395557	1410196	MSTRG.10111.1	8	1006	MSTRG.10111
j	novel	0.0530779	-0.024576	NW_004973333.1	-	1395557	1410223	MSTRG.10111.2	7	778	MSTRG.10111
u	novel	0.0561137	-0.0352256	NW_004973333.1	-	1443549	1449819	MSTRG.10114.1	2	6219	MSTRG.10114
i	novel	0.0201201	-0.032768	NW_004973333.1	+	1462136	1463028	MSTRG.10115.1	1	893	MSTRG.10115
u	novel	0.402691	-0.0180224	NW_004973333.1	+	1604553	1693604	MSTRG.10119.2	4	1071	MSTRG.10119
u	novel	0.025106	-0.08192	NW_004973333.1	+	1604553	1651881	MSTRG.10119.3	3	1995	MSTRG.10119
u	novel	0.0492119	-0.004096	NW_004973333.1	+	1604587	1699527	MSTRG.10119.4	3	3213	MSTRG.10119
u	novel	0.0145607	-0.0299008	NW_004973333.1	+	1683575	1730670	MSTRG.10119.5	5	568	MSTRG.10119
o	novel	0.160475	-0.0401408	NW_004973333.1	+	1719408	1804447	MSTRG.10120.1	2	5066	MSTRG.10120
u	novel	0.0587383	-0.036864	NW_004973333.1	-	1990258	1999756	MSTRG.10129.1	5	4588	MSTRG.10129
x	novel	0.0727773	-0.0303104	NW_004973333.1	+	2150546	2166768	MSTRG.10133.1	3	4689	MSTRG.10133
u	novel	0.0731121	-0.022528	NW_004973333.1	.	2948871	2949346	MSTRG.10141.1	1	476	MSTRG.10141
u	novel	0.143861	-0.0004096	NW_004973333.1	-	2953845	3001743	MSTRG.10142.1	3	1176	MSTRG.10142
u	novel	0.0452033	-0.065536	NW_004973333.1	-	2965852	3001733	MSTRG.10142.2	4	2754	MSTRG.10142
u	novel	0.0242142	-0.0262144	NW_004973333.1	-	2977588	3001743	MSTRG.10142.3	5	523	MSTRG.10142
u	novel	0.134027	-0.0475136	NW_004973333.1	+	3618428	3621348	MSTRG.10147.1	2	2263	MSTRG.10147
u	novel	0.0222226	-0.028672	NW_004973333.1	+	3768207	3768785	MSTRG.10148.1	1	579	MSTRG.10148
x	novel	0.0888117	-0.032768	NW_004973333.1	+	3769430	3792338	MSTRG.10149.1	3	2915	MSTRG.10149
j	novel	0.405684	-0.0196608	NW_004973333.1	+	3345767	3607924	MSTRG.10156.4	16	14673	MSTRG.10156
j	novel	0.0738109	-0.0065536	NW_004973333.1	+	3348002	3506088	MSTRG.10156.5	4	8342	MSTRG.10156
u	novel	0.0200068	-0.0147456	NW_004973333.1	+	4232354	4234826	MSTRG.10166.1	2	2448	MSTRG.10166
u	novel	0.0588108	-0.0274432	NW_004973333.1	-	4295389	4345852	MSTRG.10167.1	4	2291	MSTRG.10167
u	novel	0.0900919	-0.0237568	NW_004973333.1	-	4323162	4345841	MSTRG.10167.2	3	718	MSTRG.10167
j	novel	0.0939912	-0.008192	NW_004973333.1	-	4368119	4574553	MSTRG.10168.1	4	1205	MSTRG.10168
j	novel	0.0279441	-0.0008192	NW_004973333.1	-	4409897	4499120	MSTRG.10168.2	4	5174	MSTRG.10168
j	novel	0.0218664	-0.04096	NW_004973333.1	-	4889404	4893648	MSTRG.10188.14	3	1922	MSTRG.10188
j	novel	0.352235	-0.0319488	NW_004973333.1	-	4887555	4893741	MSTRG.10188.7	3	2408	MSTRG.10188
i	novel	0.115425	-0.0487424	NW_004973178.1	.	41509	43477	MSTRG.102.1	1	1969	MSTRG.102
j	novel	0.0928591	-0.0937984	NW_004973333.1	-	5481392	5484577	MSTRG.10204.3	5	536	MSTRG.10204
u	novel	0.0843864	-0.0335872	NW_004973333.1	.	5555043	5560813	MSTRG.10207.1	1	5771	MSTRG.10207
u	novel	0.037624	-0.0004096	NW_004973333.1	-	5565322	5572420	MSTRG.10208.1	1	7099	MSTRG.10208
j	novel	0.0578491	-0.0249856	NW_004973333.1	-	6775549	6781092	MSTRG.10265.1	2	1622	MSTRG.10265
i	novel	0.0816124	-0.0233472	NW_004973333.1	-	6848310	6850767	MSTRG.10273.1	1	2458	MSTRG.10273
u	novel	0.244392	-0.028672	NW_004973333.1	.	6979704	6981395	MSTRG.10277.1	1	1692	MSTRG.10277
j	novel	0.0279223	-0.073728	NW_004973190.1	+	2571141	2574033	MSTRG.1028.2	4	466	MSTRG.1028
u	novel	0.185219	-0.0684032	NW_004973333.1	.	7201363	7201745	MSTRG.10282.1	1	383	MSTRG.10282
u	novel	0.0119161	-0.0004096	NW_004973333.1	+	7264265	7264516	MSTRG.10291.1	1	252	MSTRG.10291
u	novel	0.103803	-0.0008192	NW_004973333.1	+	7350038	7354487	MSTRG.10293.1	1	4450	MSTRG.10293
u	novel	0.0234796	-0.18432	NW_004973333.1	+	7388275	7414867	MSTRG.10294.1	2	1523	MSTRG.10294
u	novel	0.163233	-0.02048	NW_004973333.1	+	7388275	7414867	MSTRG.10294.2	3	1723	MSTRG.10294
x	novel	0.0567822	-0.004096	NW_004973333.1	+	7466723	7471997	MSTRG.10296.1	3	603	MSTRG.10296
u	novel	0.032732	-0.008192	NW_004973333.1	-	8101892	8124716	MSTRG.10306.1	3	241	MSTRG.10306
i	novel	0.346432	-0.0516096	NW_004973190.1	.	2729681	2730148	MSTRG.1031.1	1	468	MSTRG.1031
j	novel	0.0281052	-0.0192512	NW_004973333.1	-	8366280	8381848	MSTRG.10313.12	4	3079	MSTRG.10313
i	novel	0.130916	-0.057344	NW_004973333.1	.	8361360	8361648	MSTRG.10315.1	1	289	MSTRG.10315
i	novel	0.0379119	-0.0344064	NW_004973333.1	.	8400990	8401498	MSTRG.10320.1	1	509	MSTRG.10320
j	novel	0.0635858	-0.0299008	NW_004973333.1	+	9635020	9644782	MSTRG.10338.2	5	3587	MSTRG.10338
i	novel	0.00764708	-0.0004096	NW_004973190.1	.	2858089	2858406	MSTRG.1034.1	1	318	MSTRG.1034
u	novel	0.169341	-0.0172032	NW_004973333.1	+	9855517	9865628	MSTRG.10344.1	2	1991	MSTRG.10344
u	novel	0.0366827	-0.0892928	NW_004973333.1	+	9855551	9857332	MSTRG.10344.2	2	1047	MSTRG.10344
u	novel	0.138271	-0.0413696	NW_004973333.1	+	9855644	9907717	MSTRG.10344.3	2	2228	MSTRG.10344
x	novel	0.0178795	-0.189645	NW_004973333.1	+	9958367	9967772	MSTRG.10346.1	3	409	MSTRG.10346
u	novel	0.0251973	-0.166298	NW_004973333.1	+	9958367	9967387	MSTRG.10346.2	3	1196	MSTRG.10346
u	novel	0.0241868	-0.173261	NW_004973333.1	+	9958367	9967387	MSTRG.10346.3	3	1900	MSTRG.10346
i	novel	0.0417306	-0.0917504	NW_004973333.1	-	10617240	10618684	MSTRG.10366.1	3	400	MSTRG.10366
i	novel	0.00844702	-0.090112	NW_004973333.1	-	10617304	10618683	MSTRG.10366.2	3	317	MSTRG.10366
j	novel	0.105182	-0.125747	NW_004973333.1	-	10806747	10811089	MSTRG.10377.1	2	3728	MSTRG.10377
x	novel	0.157658	-0.032768	NW_004973333.1	+	11651294	11651682	MSTRG.10415.1	2	311	MSTRG.10415
x	novel	0.290389	-0.067584	NW_004973333.1	-	11858633	11860022	MSTRG.10422.1	2	845	MSTRG.10422
u	novel	0.151947	-0.0004096	NW_004973334.1	.	55141	55467	MSTRG.10424.1	1	327	MSTRG.10424
j	novel	0.0182367	-0.0868352	NW_004973190.1	+	3177370	3181176	MSTRG.1043.2	3	1864	MSTRG.1043
u	novel	0.305187	-0.0200704	NW_004973334.1	-	347165	349744	MSTRG.10435.1	2	1745	MSTRG.10435
u	novel	0.079112	-0.086016	NW_004973334.1	-	350815	352086	MSTRG.10436.1	2	1204	MSTRG.10436
u	novel	0.0208879	-0.0004096	NW_004973334.1	.	431548	431810	MSTRG.10437.1	1	263	MSTRG.10437
j	novel	0.0105489	-0.0827392	NW_004973334.1	+	471092	477979	MSTRG.10438.1	3	1353	MSTRG.10438
j	novel	0.359544	-0.012288	NW_004973334.1	-	537743	542515	MSTRG.10439.1	3	1879	MSTRG.10439
i	novel	0.0496247	-0.053248	NW_004973334.1	.	845533	845769	MSTRG.10443.1	1	237	MSTRG.10443
u	novel	0.00799731	-0.1024	NW_004973190.1	.	3378834	3379174	MSTRG.1045.1	1	341	MSTRG.1045
j	novel	0.0467904	-0.1024	NW_004973334.1	+	1494225	1501427	MSTRG.10451.2	3	4783	MSTRG.10451
u	novel	0.302829	-0.0946176	NW_004973334.1	.	1708869	1709494	MSTRG.10454.1	1	626	MSTRG.10454
j	novel	0.131558	-0.014336	NW_004973334.1	+	1246198	1259383	MSTRG.10458.1	6	2354	MSTRG.10458
j	novel	0.025042	-0.02048	NW_004973334.1	+	1247426	1259572	MSTRG.10458.2	3	971	MSTRG.10458
j	novel	0.0626744	-0.04096	NW_004973334.1	+	1247426	1259383	MSTRG.10458.3	4	831	MSTRG.10458
u	novel	0.0334372	-0.0421888	NW_004973334.1	.	1477010	1477607	MSTRG.10464.1	1	598	MSTRG.10464
i	novel	0.169078	-0.008192	NW_004973190.1	.	3453092	3476582	MSTRG.1047.1	1	23491	MSTRG.1047
o	novel	0.0727838	-0.014336	NW_004973334.1	-	2254257	2273698	MSTRG.10474.1	2	19413	MSTRG.10474
u	novel	0.0527813	-0.024576	NW_004973334.1	.	2469903	2473350	MSTRG.10482.1	1	3448	MSTRG.10482
u	novel	0.072622	-0.0393216	NW_004973334.1	.	2475180	2482232	MSTRG.10483.1	1	7053	MSTRG.10483
j	novel	0.15584	-0.004096	NW_004973334.1	+	2939592	2946218	MSTRG.10490.2	2	2036	MSTRG.10490
j	novel	0.0310531	-0.045056	NW_004973334.1	-	3282632	3310966	MSTRG.10496.1	7	2199	MSTRG.10496
j	novel	0.0312704	-0.0397312	NW_004973334.1	-	3282632	3311841	MSTRG.10496.2	7	2441	MSTRG.10496
j	novel	0.120921	-0.045056	NW_004973334.1	-	3282632	3306980	MSTRG.10496.7	6	2882	MSTRG.10496
i	novel	0.0170932	-0.0004096	NW_004973190.1	.	3498031	3498530	MSTRG.1050.1	1	500	MSTRG.1050
i	novel	0.0212391	-0.049152	NW_004973334.1	-	3432077	3432724	MSTRG.10502.1	1	648	MSTRG.10502
u	novel	0.155763	-0.0679936	NW_004973334.1	-	3944173	3946019	MSTRG.10504.1	1	1847	MSTRG.10504
i	novel	0.0199204	-0.0319488	NW_004973334.1	.	4406317	4406553	MSTRG.10516.1	1	237	MSTRG.10516
u	novel	0.00384921	-0.0004096	NW_004973190.1	.	3675453	3675886	MSTRG.1052.1	1	434	MSTRG.1052
u	novel	0.04955	-0.0352256	NW_004973334.1	.	4699651	4706970	MSTRG.10523.1	1	7320	MSTRG.10523
u	novel	0.0815997	-0.2048	NW_004973335.1	-	8397	18923	MSTRG.10535.1	3	10395	MSTRG.10535
u	novel	0.0817765	-0.2048	NW_004973335.1	-	8409	18935	MSTRG.10535.2	2	10460	MSTRG.10535
j	novel	0.0271292	-0.065536	NW_004973190.1	-	3846477	3852575	MSTRG.1054.12	2	2921	MSTRG.1054
u	novel	0.027748	-0.016384	NW_004973335.1	-	446287	465038	MSTRG.10548.1	4	1056	MSTRG.10548
u	novel	0.0352591	-0.0139264	NW_004973335.1	-	461011	465091	MSTRG.10548.2	4	977	MSTRG.10548
u	novel	0.0656184	-0.0004096	NW_004973335.1	.	683532	683775	MSTRG.10551.1	1	244	MSTRG.10551
j	novel	0.0443618	-0.024576	NW_004973335.1	-	706684	718494	MSTRG.10552.1	5	3950	MSTRG.10552
x	novel	0.00775181	-0.0806912	NW_004973336.1	+	185079	186664	MSTRG.10554.1	2	278	MSTRG.10554
u	novel	0.179652	-0.065536	NW_004973336.1	.	1452	2257	MSTRG.10555.1	1	806	MSTRG.10555
u	novel	0.157499	-0.075776	NW_004973336.1	+	4494	5219	MSTRG.10557.1	3	437	MSTRG.10557
u	novel	0.191425	-0.012288	NW_004973336.1	+	34872	35590	MSTRG.10559.1	1	719	MSTRG.10559
u	novel	0.0997845	-0.0520192	NW_004973336.1	.	37849	41554	MSTRG.10560.1	1	3706	MSTRG.10560
u	novel	0.00477954	-0.016384	NW_004973336.1	.	43058	43340	MSTRG.10561.1	1	283	MSTRG.10561
u	novel	0.0469057	-0.055296	NW_004973336.1	.	43700	44769	MSTRG.10562.1	1	1070	MSTRG.10562
u	novel	0.163935	-0.0704512	NW_004973336.1	.	53185	54545	MSTRG.10565.1	1	1361	MSTRG.10565
u	novel	0.117142	-0.0741376	NW_004973336.1	.	55877	56530	MSTRG.10566.1	1	654	MSTRG.10566
u	novel	0.0530245	-0.047104	NW_004973336.1	.	135752	136038	MSTRG.10570.1	1	287	MSTRG.10570
u	novel	0.0360296	-0.0073728	NW_004973337.1	.	423877	425050	MSTRG.10575.1	1	1174	MSTRG.10575
u	novel	0.366247	-0.028672	NW_004973337.1	.	853173	853760	MSTRG.10578.1	1	588	MSTRG.10578
u	novel	0.0190809	-0.598016	NW_004973337.1	.	947733	948013	MSTRG.10579.1	1	281	MSTRG.10579
j	novel	0.0859453	-0.012288	NW_004973337.1	-	369638	404259	MSTRG.10580.12	3	3494	MSTRG.10580
u	novel	0.0044981	-0.101171	NW_004973337.1	.	1756713	1756962	MSTRG.10589.1	1	250	MSTRG.10589
u	novel	0.0419081	-0.0012288	NW_004973337.1	.	2242041	2242461	MSTRG.10590.1	1	421	MSTRG.10590
j	novel	0.0718063	-0.0520192	NW_004973337.1	-	2297312	2305020	MSTRG.10593.2	3	7444	MSTRG.10593
o	novel	0.176136	-0.189645	NW_004973337.1	+	2315406	2698135	MSTRG.10594.1	2	31084	MSTRG.10594
u	novel	0.480322	-0.0290816	NW_004973337.1	-	2324353	2338237	MSTRG.10595.2	2	13167	MSTRG.10595
u	novel	0.147958	-0.0299008	NW_004973337.1	-	2338345	2354805	MSTRG.10595.3	2	10411	MSTRG.10595
i	novel	0.258692	-0.0167936	NW_004973337.1	+	3202240	3202747	MSTRG.10605.1	1	508	MSTRG.10605
u	novel	0.00565342	-0.04096	NW_004973337.1	.	3217394	3218229	MSTRG.10606.1	1	836	MSTRG.10606
u	novel	0.0323186	-0.016384	NW_004973337.1	.	3779777	3781613	MSTRG.10611.1	1	1837	MSTRG.10611
u	novel	0.00656926	-0.0004096	NW_004973337.1	.	3784563	3784957	MSTRG.10612.1	1	395	MSTRG.10612
u	novel	0.0610629	-0.075776	NW_004973337.1	.	3534407	3534684	MSTRG.10622.1	1	278	MSTRG.10622
u	novel	0.144526	-0.126976	NW_004973337.1	.	3572248	3572604	MSTRG.10623.1	1	357	MSTRG.10623
u	novel	0.0177453	-0.0434176	NW_004973337.1	+	3574929	3582684	MSTRG.10624.1	2	266	MSTRG.10624
u	novel	0.0252289	-0.0884736	NW_004973337.1	.	3595246	3595464	MSTRG.10625.1	1	219	MSTRG.10625
i	novel	0.0163935	-0.0004096	NW_004973190.1	.	4505016	4505238	MSTRG.1063.1	1	223	MSTRG.1063
u	novel	0.00284191	-0.0004096	NW_004973337.1	.	3801671	3801892	MSTRG.10631.1	1	222	MSTRG.10631
u	novel	0.199924	-0.036864	NW_004973337.1	.	3861570	3862039	MSTRG.10634.1	1	470	MSTRG.10634
u	novel	0.0528174	-0.016384	NW_004973337.1	.	3966374	3966819	MSTRG.10643.1	1	446	MSTRG.10643
u	novel	0.0470618	-0.0258048	NW_004973337.1	-	3987081	4001819	MSTRG.10645.1	2	1176	MSTRG.10645
u	novel	0.184475	-0.0442368	NW_004973337.1	+	4133651	4134315	MSTRG.10649.1	2	476	MSTRG.10649
u	novel	0.179124	-0.0241664	NW_004973338.1	+	475	5279	MSTRG.10650.1	2	4731	MSTRG.10650
i	novel	0.209092	-0.0290816	NW_004973338.1	+	9267	14128	MSTRG.10652.1	2	3682	MSTRG.10652
j	novel	0.039344	-0.0339968	NW_004973338.1	+	543208	550845	MSTRG.10663.1	7	5728	MSTRG.10663
j	novel	0.0386198	-0.04096	NW_004973338.1	+	543241	550837	MSTRG.10663.10	6	3388	MSTRG.10663
i	novel	0.234267	-0.0270336	NW_004973338.1	-	593396	599545	MSTRG.10668.1	3	6052	MSTRG.10668
j	novel	0.142166	-0.0397312	NW_004973338.1	-	638186	701962	MSTRG.10670.1	11	4336	MSTRG.10670
i	novel	0.0849902	-0.0274432	NW_004973338.1	+	935450	942059	MSTRG.10678.1	2	6571	MSTRG.10678
j	novel	0.0596933	-0.0217088	NW_004973338.1	-	1121736	1138686	MSTRG.10682.8	4	1458	MSTRG.10682
j	novel	0.0962449	-0.004096	NW_004973338.1	-	1132789	1138699	MSTRG.10682.9	3	1449	MSTRG.10682
i	novel	0.0917369	-0.0176128	NW_004973338.1	+	1068804	1077770	MSTRG.10683.1	2	8878	MSTRG.10683
u	novel	0.0690489	-0.0294912	NW_004973338.1	.	1151703	1151948	MSTRG.10685.1	1	246	MSTRG.10685
u	novel	0.188401	-0.03072	NW_004973338.1	.	1153513	1155071	MSTRG.10686.1	1	1559	MSTRG.10686
j	novel	0.0819188	-0.077824	NW_004973338.1	+	1160304	1201365	MSTRG.10687.1	2	861	MSTRG.10687
x	novel	0.00704947	-0.0151552	NW_004973338.1	+	1189298	1190122	MSTRG.10689.1	2	741	MSTRG.10689
j	novel	0.0328034	-0.107725	NW_004973338.1	+	1439879	1494136	MSTRG.10697.2	5	3904	MSTRG.10697
j	novel	0.0691329	-0.057344	NW_004973340.1	-	39243	46866	MSTRG.10701.1	2	1038	MSTRG.10701
j	novel	0.00441556	-0.0114688	NW_004973340.1	-	94125	96064	MSTRG.10702.1	3	731	MSTRG.10702
j	novel	0.195987	-0.077824	NW_004973340.1	-	94125	96126	MSTRG.10702.2	2	728	MSTRG.10702
j	novel	0.00455903	-0.073728	NW_004973340.1	-	94125	96022	MSTRG.10702.3	3	685	MSTRG.10702
u	novel	0.00565083	-0.04096	NW_004973340.1	+	496622	497091	MSTRG.10711.1	1	470	MSTRG.10711
j	novel	0.135306	-0.0475136	NW_004973340.1	+	500792	508256	MSTRG.10712.7	5	3997	MSTRG.10712
j	novel	0.0241718	-0.012288	NW_004973340.1	+	523200	533716	MSTRG.10715.1	3	1866	MSTRG.10715
u	novel	0.214088	-0.0241664	NW_004973340.1	-	650738	656120	MSTRG.10717.1	2	466	MSTRG.10717
j	novel	0.105218	-0.0864256	NW_004973340.1	-	688802	693667	MSTRG.10719.21	3	1168	MSTRG.10719
j	novel	0.128158	-0.0458752	NW_004973340.1	-	826376	860548	MSTRG.10719.28	3	2743	MSTRG.10719
u	novel	0.355027	-0.002048	NW_004973340.1	-	1048089	1053114	MSTRG.10726.1	2	354	MSTRG.10726
u	novel	0.394136	-0.0331776	NW_004973340.1	+	1068229	1070306	MSTRG.10727.1	2	1387	MSTRG.10727
u	novel	0.116544	-0.0319488	NW_004973340.1	.	1027923	1032659	MSTRG.10731.1	1	4737	MSTRG.10731
u	novel	0.034128	-0.004096	NW_004973340.1	.	1112457	1112856	MSTRG.10733.1	1	400	MSTRG.10733
u	novel	0.0356859	-0.04096	NW_004973340.1	-	1578457	1580789	MSTRG.10741.1	2	814	MSTRG.10741
u	novel	0.042907	-0.106496	NW_004973340.1	+	1724208	1727527	MSTRG.10742.1	3	539	MSTRG.10742
u	novel	0.00433894	-0.0004096	NW_004973340.1	+	1724508	1724805	MSTRG.10743.1	1	298	MSTRG.10743
u	novel	0.0953728	-0.08192	NW_004973340.1	-	1724508	1724805	MSTRG.10744.1	1	298	MSTRG.10744
u	novel	0.182566	-0.0606208	NW_004973340.1	+	1725221	1725759	MSTRG.10745.1	1	539	MSTRG.10745
u	novel	0.228216	-0.0835584	NW_004973340.1	-	1725307	1727124	MSTRG.10746.2	1	1818	MSTRG.10746
u	novel	0.041046	-0.0147456	NW_004973340.1	+	1751949	1774922	MSTRG.10747.1	2	1750	MSTRG.10747
u	novel	0.0181769	-0.0651264	NW_004973340.1	+	1751949	1765055	MSTRG.10747.2	2	737	MSTRG.10747
x	novel	0.0416881	-0.0331776	NW_004973341.1	+	111301	114530	MSTRG.10756.1	2	2534	MSTRG.10756
x	novel	0.320958	-0.0036864	NW_004973341.1	+	158533	160464	MSTRG.10760.1	2	1849	MSTRG.10760
o	novel	0.287099	-0.0229376	NW_004973341.1	+	162918	177963	MSTRG.10762.1	3	14860	MSTRG.10762
u	novel	0.111686	-0.0454656	NW_004973341.1	-	204921	213841	MSTRG.10764.1	2	8881	MSTRG.10764
u	novel	0.0850207	-0.0135168	NW_004973341.1	-	239485	249211	MSTRG.10765.1	2	9658	MSTRG.10765
u	novel	0.0457236	-0.04096	NW_004973341.1	.	268516	271580	MSTRG.10768.1	1	3065	MSTRG.10768
u	novel	0.0354717	-0.03072	NW_004973341.1	.	291558	294926	MSTRG.10769.1	1	3369	MSTRG.10769
j	novel	0.00676267	-0.012288	NW_004973341.1	+	325537	347481	MSTRG.10770.6	3	353	MSTRG.10770
x	novel	0.0344359	-0.049152	NW_004973341.1	+	1079378	1080721	MSTRG.10782.1	2	1232	MSTRG.10782
x	novel	0.035549	-0.02048	NW_004973341.1	+	1172278	1173270	MSTRG.10788.1	2	958	MSTRG.10788
j	novel	0.207377	-0.0528384	NW_004973341.1	+	1322137	1333585	MSTRG.10795.2	8	6681	MSTRG.10795
x	novel	0.0149201	-0.0294912	NW_004973341.1	-	1328131	1329249	MSTRG.10797.1	3	940	MSTRG.10797
u	novel	0.0381726	-0.188416	NW_004973341.1	-	1365545	1367849	MSTRG.10801.1	2	2212	MSTRG.10801
u	novel	0.382924	-0.0462848	NW_004973341.1	+	1448909	1458804	MSTRG.10803.1	3	1264	MSTRG.10803
j	novel	0.0286761	-0.06144	NW_004973341.1	+	1460334	1497402	MSTRG.10804.1	3	2445	MSTRG.10804
j	novel	0.203978	-0.0159744	NW_004973341.1	-	1888157	1899277	MSTRG.10809.1	4	9347	MSTRG.10809
u	novel	0.0758966	-0.024576	NW_004973341.1	.	2475068	2475968	MSTRG.10817.1	1	901	MSTRG.10817
o	novel	0.0216191	-0.0004096	NW_004973341.1	-	2761098	2791575	MSTRG.10819.2	2	609	MSTRG.10819
u	novel	0.0182984	-0.0004096	NW_004973342.1	.	136471	136727	MSTRG.10823.1	1	257	MSTRG.10823
u	novel	0.0980187	-0.090112	NW_004973343.1	-	125414	149620	MSTRG.10832.1	3	3732	MSTRG.10832
u	novel	0.317608	-0.0008192	NW_004973343.1	-	139974	149620	MSTRG.10832.2	3	1696	MSTRG.10832
u	novel	0.200231	-0.0012288	NW_004973343.1	-	139979	149611	MSTRG.10832.3	3	3342	MSTRG.10832
u	novel	0.116418	-0.036864	NW_004973343.1	-	141730	149619	MSTRG.10832.4	3	3533	MSTRG.10832
u	novel	0.212576	-0.0135168	NW_004973343.1	-	145307	149611	MSTRG.10832.5	3	1237	MSTRG.10832
u	novel	0.0162164	-0.057344	NW_004973344.1	.	568463	568695	MSTRG.10840.1	1	233	MSTRG.10840
i	novel	0.0267872	-0.0131072	NW_004973345.1	-	39126	41465	MSTRG.10845.1	2	2249	MSTRG.10845
o	novel	0.154539	-0.04096	NW_004973344.1	+	19044	383572	MSTRG.10853.1	3	275	MSTRG.10853
o	novel	0.365969	-0.02048	NW_004973344.1	-	22731	155545	MSTRG.10854.1	3	443	MSTRG.10854
o	novel	0.172192	-0.008192	NW_004973344.1	-	27117	40654	MSTRG.10854.2	2	355	MSTRG.10854
o	novel	0.168994	-0.03072	NW_004973344.1	-	27117	157462	MSTRG.10854.3	2	279	MSTRG.10854
j	novel	0.177748	-0.0761856	NW_004973344.1	-	159339	181507	MSTRG.10866.1	9	6157	MSTRG.10866
i	novel	0.0708647	-0.0548864	NW_004973344.1	-	166327	168408	MSTRG.10867.1	1	2082	MSTRG.10867
j	novel	0.120607	-0.077824	NW_004973345.1	-	268740	336274	MSTRG.10876.1	2	696	MSTRG.10876
j	novel	0.10624	-0.077824	NW_004973345.1	-	346448	499176	MSTRG.10877.1	5	4692	MSTRG.10877
j	novel	0.01718	-0.0434176	NW_004973345.1	-	384048	499171	MSTRG.10877.10	5	717	MSTRG.10877
j	novel	0.00976725	-0.135168	NW_004973345.1	-	384048	499169	MSTRG.10877.11	4	591	MSTRG.10877
j	novel	0.116927	-0.077824	NW_004973345.1	-	347823	499169	MSTRG.10877.2	4	3203	MSTRG.10877
j	novel	0.105035	-0.0315392	NW_004973345.1	-	348036	499176	MSTRG.10877.3	6	3196	MSTRG.10877
j	novel	0.105035	-0.077824	NW_004973345.1	-	348106	499176	MSTRG.10877.6	6	3152	MSTRG.10877
j	novel	0.0122676	-0.045056	NW_004973345.1	-	384048	499176	MSTRG.10877.7	3	523	MSTRG.10877
j	novel	0.0216952	-0.0004096	NW_004973345.1	-	384048	499176	MSTRG.10877.8	4	630	MSTRG.10877
j	novel	0.01249	-0.208896	NW_004973345.1	-	384048	499169	MSTRG.10877.9	4	627	MSTRG.10877
j	novel	0.0858746	-0.024576	NW_004973345.1	-	553162	599130	MSTRG.10881.1	3	636	MSTRG.10881
j	novel	0.0327329	-0.012288	NW_004973345.1	-	553352	624653	MSTRG.10881.4	3	495	MSTRG.10881
x	novel	0.041329	-0.028672	NW_004973345.1	-	565428	624653	MSTRG.10881.5	5	3121	MSTRG.10881
x	novel	0.0171432	-0.065536	NW_004973345.1	-	566411	624554	MSTRG.10881.6	4	1415	MSTRG.10881
u	novel	0.0384411	-0.069632	NW_004973345.1	.	1349435	1349782	MSTRG.10885.1	1	348	MSTRG.10885
j	novel	0.131516	-0.049152	NW_004973345.1	+	1284179	1291110	MSTRG.10886.1	3	2941	MSTRG.10886
x	novel	0.0315444	-0.04096	NW_004973345.1	-	1288167	1291201	MSTRG.10887.1	2	2953	MSTRG.10887
i	novel	0.132664	-0.024576	NW_004973345.1	-	995556	1014538	MSTRG.10895.1	2	18933	MSTRG.10895
i	novel	0.132664	-0.024576	NW_004973345.1	-	995572	1014538	MSTRG.10895.2	2	18923	MSTRG.10895
i	novel	0.47644	-0.02048	NW_004973345.1	-	1014597	1018432	MSTRG.10896.1	2	3762	MSTRG.10896
i	novel	0.293443	-0.0958464	NW_004973345.1	-	1081843	1111867	MSTRG.10898.1	2	29841	MSTRG.10898
i	novel	0.0583711	-0.012288	NW_004973345.1	+	1132196	1134175	MSTRG.10901.1	2	1925	MSTRG.10901
i	novel	0.0516857	-0.126976	NW_004973345.1	-	1132196	1134386	MSTRG.10902.1	2	2137	MSTRG.10902
u	novel	0.154866	-0.0454656	NW_004973347.1	+	134492	143474	MSTRG.10906.1	2	1467	MSTRG.10906
u	novel	0.113779	-0.018432	NW_004973347.1	.	165563	166103	MSTRG.10908.1	1	541	MSTRG.10908
u	novel	0.117485	-0.0004096	NW_004973347.1	.	166714	167164	MSTRG.10909.1	1	451	MSTRG.10909
u	novel	0.122647	-0.495616	NW_004973347.1	.	168206	168950	MSTRG.10910.1	1	745	MSTRG.10910
u	novel	0.026217	-0.024576	NW_004973347.1	.	183777	184294	MSTRG.10912.1	1	518	MSTRG.10912
i	novel	0.0158686	-0.02048	NW_004973347.1	.	202038	202248	MSTRG.10914.1	1	211	MSTRG.10914
i	novel	0.173783	-0.0126976	NW_004973347.1	.	203644	204285	MSTRG.10915.1	1	642	MSTRG.10915
u	novel	0.288526	-0.016384	NW_004973347.1	.	223120	226160	MSTRG.10917.1	1	3041	MSTRG.10917
i	novel	0.0168896	-0.16384	NW_004973190.1	-	5751441	5752811	MSTRG.1092.1	1	1371	MSTRG.1092
i	novel	0.0202549	-0.0004096	NW_004973347.1	.	322093	322298	MSTRG.10924.1	1	206	MSTRG.10924
x	novel	0.0343384	-0.0663552	NW_004973347.1	+	546161	594465	MSTRG.10930.1	5	1723	MSTRG.10930
u	novel	0.0609113	-0.004096	NW_004973347.1	+	557899	632234	MSTRG.10930.2	4	862	MSTRG.10930
u	novel	0.0442804	-0.004096	NW_004973347.1	+	557924	632306	MSTRG.10930.3	3	821	MSTRG.10930
i	novel	0.0776692	-0.0278528	NW_004973347.1	+	854083	854519	MSTRG.10935.1	1	437	MSTRG.10935
i	novel	0.0996788	-0.0454656	NW_004973347.1	.	871278	871621	MSTRG.10937.1	1	344	MSTRG.10937
i	novel	0.192204	-0.04096	NW_004973347.1	-	894241	894809	MSTRG.10938.1	1	569	MSTRG.10938
i	novel	0.0311279	-0.024576	NW_004973347.1	.	983950	985061	MSTRG.10941.1	1	1112	MSTRG.10941
i	novel	0.0798868	-0.139264	NW_004973347.1	-	1073901	1074475	MSTRG.10942.1	1	575	MSTRG.10942
x	novel	0.0436811	-0.028672	NW_004973347.1	+	1076729	1085329	MSTRG.10943.1	2	289	MSTRG.10943
i	novel	0.243573	-0.0303104	NW_004973347.1	-	1086727	1087311	MSTRG.10945.1	1	585	MSTRG.10945
o	novel	0.00710379	-0.0090112	NW_004973347.1	+	1372512	1428097	MSTRG.10948.1	2	353	MSTRG.10948
x	novel	0.026362	-0.032768	NW_004973347.1	-	1407381	1428095	MSTRG.10949.1	2	337	MSTRG.10949
x	novel	0.0715401	-0.036864	NW_004973347.1	+	1508485	1566037	MSTRG.10951.1	6	5257	MSTRG.10951
u	novel	0.362678	-0.0663552	NW_004973347.1	+	2338989	2352570	MSTRG.10952.2	2	8472	MSTRG.10952
i	novel	0.12296	-0.0004096	NW_004973347.1	.	2523522	2523736	MSTRG.10956.1	1	215	MSTRG.10956
j	novel	0.264307	-0.0536576	NW_004973347.1	+	2561989	2564549	MSTRG.10958.1	5	1985	MSTRG.10958
o	novel	0.204611	-0.0425984	NW_004973347.1	+	1752234	1827030	MSTRG.10964.1	2	8808	MSTRG.10964
x	novel	0.204611	-0.0425984	NW_004973347.1	+	1786996	1827083	MSTRG.10964.2	3	11388	MSTRG.10964
i	novel	0.215898	-0.0483328	NW_004973347.1	+	1830427	1862070	MSTRG.10966.1	4	7967	MSTRG.10966
i	novel	0.0479172	-0.0155648	NW_004973347.1	+	1853052	1855295	MSTRG.10967.1	1	2244	MSTRG.10967
x	novel	0.290688	-0.0598016	NW_004973347.1	+	1857751	1960044	MSTRG.10968.1	3	4050	MSTRG.10968
i	novel	0.0128031	-0.04096	NW_004973190.1	.	6113510	6114044	MSTRG.1097.1	1	535	MSTRG.1097
i	novel	0.0481735	-0.0274432	NW_004973347.1	+	1943303	1981550	MSTRG.10970.3	2	8271	MSTRG.10970
o	novel	0.078248	-0.04096	NW_004973347.1	+	1947909	2244515	MSTRG.10971.1	2	6885	MSTRG.10971
o	novel	0.115949	-0.008192	NW_004973347.1	-	1970161	2025278	MSTRG.10972.1	2	4505	MSTRG.10972
o	novel	0.0636949	-0.04096	NW_004973347.1	+	2011775	2142438	MSTRG.10973.1	2	9672	MSTRG.10973
o	novel	0.00760036	-0.036864	NW_004973347.1	+	2579887	2588526	MSTRG.10983.1	2	624	MSTRG.10983
i	novel	0.0105018	-0.0192512	NW_004973347.1	+	2630241	2630520	MSTRG.10987.1	1	280	MSTRG.10987
u	novel	0.0498115	-0.0057344	NW_004973190.1	.	6197557	6201814	MSTRG.1099.1	1	4258	MSTRG.1099
o	novel	0.029119	-0.114688	NW_004973347.1	-	2654788	2713792	MSTRG.10990.1	2	574	MSTRG.10990
u	novel	0.0128146	-0.0262144	NW_004973348.1	.	13133	13446	MSTRG.10996.1	1	314	MSTRG.10996
u	novel	0.0101705	-0.0753664	NW_004973348.1	.	15779	16168	MSTRG.10997.1	1	390	MSTRG.10997
j	novel	0.0453562	-0.032768	NW_004973347.1	-	2763039	2770870	MSTRG.11001.2	4	2865	MSTRG.11001
x	novel	0.322064	-0.04096	NW_004973347.1	+	2810159	2811734	MSTRG.11004.1	2	1527	MSTRG.11004
j	novel	0.0288484	-0.0659456	NW_004973347.1	-	2817633	2830032	MSTRG.11005.3	5	1074	MSTRG.11005
u	novel	0.0791127	-0.0475136	NW_004973348.1	.	98104	100781	MSTRG.11009.1	1	2678	MSTRG.11009
u	novel	0.00297698	-0.167936	NW_004973348.1	-	130672	136587	MSTRG.11012.1	2	241	MSTRG.11012
u	novel	0.0436222	-0.086016	NW_004973348.1	.	139338	145806	MSTRG.11013.1	1	6469	MSTRG.11013
u	novel	0.179897	-0.034816	NW_004973348.1	-	182709	184861	MSTRG.11015.1	1	2153	MSTRG.11015
j	novel	0.278676	-0.0335872	NW_004973348.1	+	187713	191775	MSTRG.11017.1	2	3642	MSTRG.11017
u	novel	0.0133937	-0.0278528	NW_004973348.1	.	219478	219678	MSTRG.11019.1	1	201	MSTRG.11019
i	novel	0.113617	-0.004096	NW_004973348.1	-	400392	404057	MSTRG.11031.7	3	980	MSTRG.11031
j	novel	0.0439492	-0.0647168	NW_004973348.1	-	400413	432532	MSTRG.11031.8	6	940	MSTRG.11031
i	novel	0.0359485	-0.0978944	NW_004973348.1	.	385193	385474	MSTRG.11032.1	1	282	MSTRG.11032
u	novel	0.0126966	-0.065536	NW_004973349.1	.	248174	248430	MSTRG.11035.1	1	257	MSTRG.11035
i	novel	0.436811	-0.0974848	NW_004973349.1	.	263231	264520	MSTRG.11042.1	1	1290	MSTRG.11042
u	novel	0.00322931	-0.06144	NW_004973349.1	.	443339	443604	MSTRG.11046.1	1	266	MSTRG.11046
x	novel	0.00870907	-0.049152	NW_004973349.1	-	400684	401094	MSTRG.11048.1	2	341	MSTRG.11048
o	novel	0.0555993	-0.034816	NW_004973349.1	+	693694	1053942	MSTRG.11051.1	2	7552	MSTRG.11051
i	novel	0.174505	-0.0110592	NW_004973349.1	-	1023290	1029189	MSTRG.11057.1	1	5900	MSTRG.11057
u	novel	0.305869	-0.135578	NW_004973349.1	.	2186294	2186925	MSTRG.11074.1	1	632	MSTRG.11074
i	novel	0.00257577	-0.053248	NW_004973349.1	.	2528675	2528923	MSTRG.11082.1	1	249	MSTRG.11082
u	novel	0.211485	-0.0512	NW_004973349.1	-	2800758	2813017	MSTRG.11084.1	2	792	MSTRG.11084
u	novel	0.144435	-0.0323584	NW_004973349.1	+	3033207	3033646	MSTRG.11086.1	1	440	MSTRG.11086
u	novel	0.014407	-0.0004096	NW_004973349.1	.	3202678	3202914	MSTRG.11087.1	1	237	MSTRG.11087
j	novel	0.123738	-0.0110592	NW_004973349.1	+	3193909	3196867	MSTRG.11088.1	3	1103	MSTRG.11088
j	novel	0.0664603	-0.0110592	NW_004973349.1	+	3194962	3196867	MSTRG.11088.3	3	1036	MSTRG.11088
u	novel	0.0105587	-0.598016	NW_004973349.1	.	3303378	3303598	MSTRG.11089.1	1	221	MSTRG.11089
u	novel	0.0238925	-0.01024	NW_004973349.1	.	3432410	3432640	MSTRG.11090.1	1	231	MSTRG.11090
u	novel	0.185321	-0.057344	NW_004973349.1	.	4343065	4343534	MSTRG.11095.1	1	470	MSTRG.11095
u	novel	0.0307658	-0.0438272	NW_004973349.1	.	4454347	4455011	MSTRG.11097.1	1	665	MSTRG.11097
u	novel	0.0855315	-0.012288	NW_004973349.1	.	4714766	4714979	MSTRG.11101.1	1	214	MSTRG.11101
u	novel	0.24534	-0.016384	NW_004973350.1	+	80398	83164	MSTRG.11114.2	2	2679	MSTRG.11114
u	novel	0.185363	-0.110592	NW_004973350.1	+	81007	83319	MSTRG.11114.3	3	2225	MSTRG.11114
u	novel	0.209439	-0.233472	NW_004973350.1	+	81462	83173	MSTRG.11114.4	3	1646	MSTRG.11114
u	novel	0.216611	-0.073728	NW_004973350.1	+	81462	83173	MSTRG.11114.5	2	1624	MSTRG.11114
o	novel	0.150498	-0.0626688	NW_004973350.1	+	131306	144511	MSTRG.11117.1	2	4673	MSTRG.11117
u	novel	0.0106639	-0.032768	NW_004973350.1	+	255658	256435	MSTRG.11118.1	1	778	MSTRG.11118
o	novel	0.158244	-0.0057344	NW_004973191.1	+	322984	347460	MSTRG.1112.1	3	24365	MSTRG.1112
i	novel	0.128612	-0.028672	NW_004973350.1	.	557331	559133	MSTRG.11129.1	1	1803	MSTRG.11129
u	novel	0.0435562	-0.045056	NW_004973350.1	.	814604	815075	MSTRG.11137.1	1	472	MSTRG.11137
u	novel	0.130178	-0.0139264	NW_004973350.1	+	888951	893244	MSTRG.11148.1	1	4294	MSTRG.11148
u	novel	0.0912071	-0.086016	NW_004973350.1	-	989989	990840	MSTRG.11150.1	1	852	MSTRG.11150
u	novel	0.0334424	-0.004096	NW_004973350.1	.	1103766	1105419	MSTRG.11154.1	1	1654	MSTRG.11154
u	novel	0.00682923	-0.0086016	NW_004973350.1	-	1204935	1213129	MSTRG.11163.1	2	444	MSTRG.11163
j	novel	0.465675	-0.045056	NW_004973350.1	-	1337826	1501764	MSTRG.11170.1	3	1181	MSTRG.11170
i	novel	0.00497678	-0.0991232	NW_004973350.1	.	1377471	1377711	MSTRG.11172.1	1	241	MSTRG.11172
u	novel	0.0818197	-0.0688128	NW_004973351.1	.	70563	71018	MSTRG.11175.1	1	456	MSTRG.11175
u	novel	0.0454335	-0.0012288	NW_004973351.1	.	256866	257487	MSTRG.11176.1	1	622	MSTRG.11176
i	novel	0.0114567	-0.02048	NW_004973191.1	.	1237370	1237679	MSTRG.1118.1	1	310	MSTRG.1118
i	novel	0.0107498	-0.012288	NW_004973352.1	-	83498	85724	MSTRG.11182.1	2	2161	MSTRG.11182
i	novel	0.140395	-0.012288	NW_004973352.1	+	162515	164156	MSTRG.11187.1	2	1531	MSTRG.11187
i	novel	0.0474318	-0.069632	NW_004973352.1	+	170723	172037	MSTRG.11188.1	2	1274	MSTRG.11188
o	novel	0.321826	-0.0606208	NW_004973352.1	+	185659	199168	MSTRG.11189.1	2	13412	MSTRG.11189
i	novel	0.289431	-0.028672	NW_004973352.1	-	346814	352156	MSTRG.11194.1	3	3839	MSTRG.11194
u	novel	0.252573	-0.0569344	NW_004973352.1	+	454197	475126	MSTRG.11197.1	3	20760	MSTRG.11197
j	novel	0.0687054	-0.110592	NW_004973352.1	+	614543	803162	MSTRG.11201.2	4	1993	MSTRG.11201
j	novel	0.0201173	-0.004096	NW_004973352.1	+	823781	879091	MSTRG.11201.30	5	2367	MSTRG.11201
j	novel	0.0204622	-0.004096	NW_004973352.1	+	823781	879091	MSTRG.11201.31	3	2157	MSTRG.11201
j	novel	0.0452917	-0.06144	NW_004973352.1	+	823781	873904	MSTRG.11201.32	4	1368	MSTRG.11201
i	novel	0.436591	-0.0131072	NW_004973352.1	-	976424	983980	MSTRG.11205.1	1	7557	MSTRG.11205
i	novel	0.436591	-0.0131072	NW_004973352.1	-	976424	983980	MSTRG.11205.2	2	7464	MSTRG.11205
x	novel	0.278966	-0.0131072	NW_004973352.1	-	1013921	1019391	MSTRG.11207.1	2	5415	MSTRG.11207
u	novel	0.0134635	-0.0176128	NW_004973352.1	-	1685042	1731413	MSTRG.11208.1	3	882	MSTRG.11208
j	novel	0.0125139	-0.0376832	NW_004973352.1	+	1046035	1057274	MSTRG.11210.1	3	807	MSTRG.11210
j	novel	0.169187	-0.036864	NW_004973352.1	-	1146365	1152463	MSTRG.11212.10	3	1689	MSTRG.11212
i	novel	0.163605	-0.006144	NW_004973352.1	-	1175391	1183188	MSTRG.11212.11	1	7798	MSTRG.11212
x	novel	0.0475684	-0.086016	NW_004973352.1	+	1102980	1114759	MSTRG.11213.1	6	2302	MSTRG.11213
i	novel	0.0373775	-0.06144	NW_004973352.1	.	1240914	1246573	MSTRG.11217.1	1	5660	MSTRG.11217
i	novel	0.0345854	-0.004096	NW_004973352.1	.	1266770	1267624	MSTRG.11218.1	1	855	MSTRG.11218
x	novel	0.210924	-0.012288	NW_004973352.1	-	1429300	1430135	MSTRG.11220.1	2	741	MSTRG.11220
x	novel	0.00985425	-0.0004096	NW_004973352.1	-	1433180	1433454	MSTRG.11221.1	2	208	MSTRG.11221
i	novel	0.0347826	-0.0729088	NW_004973353.1	.	81198	81505	MSTRG.11228.1	1	308	MSTRG.11228
i	novel	0.052563	-0.0712704	NW_004973353.1	.	88127	88385	MSTRG.11229.1	1	259	MSTRG.11229
j	novel	0.229644	-0.04096	NW_004973192.1	-	1118569	1168733	MSTRG.1123.4	5	1323	MSTRG.1123
i	novel	0.0667623	-0.0524288	NW_004973354.1	.	303006	303236	MSTRG.11232.1	1	231	MSTRG.11232
u	novel	0.205129	-0.02048	NW_004973354.1	.	404548	404980	MSTRG.11233.1	1	433	MSTRG.11233
u	novel	0.0594372	-0.0323584	NW_004973354.1	+	1339918	1349229	MSTRG.11236.1	1	9312	MSTRG.11236
u	novel	0.00913184	-0.598016	NW_004973354.1	.	1749258	1749559	MSTRG.11240.1	1	302	MSTRG.11240
u	novel	0.0319931	-0.053248	NW_004973354.1	.	2401829	2405931	MSTRG.11244.1	1	4103	MSTRG.11244
u	novel	0.029847	-0.114688	NW_004973354.1	+	2516838	2517188	MSTRG.11247.1	1	351	MSTRG.11247
u	novel	0.00962569	-0.028672	NW_004973355.1	.	80780	81054	MSTRG.11248.1	1	275	MSTRG.11248
u	novel	0.106056	-0.036864	NW_004973354.1	+	1868416	1874038	MSTRG.11249.1	1	5623	MSTRG.11249
o	novel	0.154214	-0.0278528	NW_004973354.1	-	1872659	2330963	MSTRG.11250.1	2	473	MSTRG.11250
u	novel	0.0506354	-0.028672	NW_004973354.1	+	1918942	1925248	MSTRG.11254.1	2	4136	MSTRG.11254
i	novel	0.235394	-0.0270336	NW_004973355.1	+	12150	14372	MSTRG.11274.1	1	2223	MSTRG.11274
u	novel	0.103809	-0.151552	NW_004973355.1	.	23533	24107	MSTRG.11275.1	1	575	MSTRG.11275
j	novel	0.0346605	-0.016384	NW_004973355.1	+	127362	149984	MSTRG.11276.2	3	2973	MSTRG.11276
o	novel	0.159785	-0.04096	NW_004973355.1	+	303062	304064	MSTRG.11282.2	2	937	MSTRG.11282
x	novel	0.0199153	-0.0004096	NW_004973355.1	+	309034	309298	MSTRG.11284.1	2	221	MSTRG.11284
u	novel	0.0850266	-0.0557056	NW_004973355.1	.	324819	325157	MSTRG.11285.1	1	339	MSTRG.11285
u	novel	0.0115785	-0.0004096	NW_004973355.1	-	388582	388904	MSTRG.11289.1	2	237	MSTRG.11289
j	novel	0.0726187	-0.0090112	NW_004973192.1	+	117078	129774	MSTRG.1129.1	3	7473	MSTRG.1129
j	novel	0.329082	-0.047104	NW_004973192.1	+	117078	129774	MSTRG.1129.2	3	5673	MSTRG.1129
o	novel	0.0593601	-0.104448	NW_004973355.1	+	332541	372550	MSTRG.11291.1	2	275	MSTRG.11291
o	novel	0.0682632	-0.13271	NW_004973355.1	-	352691	360941	MSTRG.11297.1	2	355	MSTRG.11297
o	novel	0.0682632	-0.13271	NW_004973355.1	-	352691	360939	MSTRG.11297.2	2	353	MSTRG.11297
u	novel	0.0766718	-0.167936	NW_004973192.1	.	263810	264818	MSTRG.1130.1	1	1009	MSTRG.1130
u	novel	0.123225	-0.0344064	NW_004973357.1	-	84621	104770	MSTRG.11308.1	2	20090	MSTRG.11308
u	novel	0.043139	-0.0004096	NW_004973192.1	.	265172	266174	MSTRG.1131.1	1	1003	MSTRG.1131
i	novel	0.0535438	-0.147456	NW_004973357.1	.	369778	370117	MSTRG.11313.1	1	340	MSTRG.11313
o	novel	0.0278981	-0.458752	NW_004973357.1	+	438894	610601	MSTRG.11314.1	2	1334	MSTRG.11314
u	novel	0.141776	-0.01024	NW_004973192.1	+	289720	290569	MSTRG.1132.1	1	850	MSTRG.1132
j	novel	0.0104377	-0.0278528	NW_004973357.1	-	665007	676583	MSTRG.11322.10	3	564	MSTRG.11322
u	novel	0.0879728	-0.0004096	NW_004973192.1	.	422828	423055	MSTRG.1133.1	1	228	MSTRG.1133
i	novel	0.0568077	-0.0139264	NW_004973357.1	+	991464	994143	MSTRG.11334.1	2	2604	MSTRG.11334
u	novel	0.00805228	-0.0004096	NW_004973358.1	.	233756	234141	MSTRG.11336.1	1	386	MSTRG.11336
j	novel	0.0629121	-0.0311296	NW_004973358.1	-	236640	249469	MSTRG.11337.1	4	1449	MSTRG.11337
i	novel	0.0504447	-0.02048	NW_004973358.1	.	243863	245777	MSTRG.11338.1	1	1915	MSTRG.11338
u	novel	0.0169427	-0.0004096	NW_004973192.1	.	533311	534008	MSTRG.1134.1	1	698	MSTRG.1134
i	novel	0.0245355	-0.118784	NW_004973358.1	-	793023	794790	MSTRG.11345.1	1	1768	MSTRG.11345
u	novel	0.0327621	-0.0008192	NW_004973192.1	-	591221	592153	MSTRG.1135.1	1	933	MSTRG.1135
u	novel	0.120146	-0.08192	NW_004973192.1	.	594217	594615	MSTRG.1136.1	1	399	MSTRG.1136
j	novel	0.240896	-0.0888832	NW_004973359.1	-	138016	144919	MSTRG.11362.1	4	3593	MSTRG.11362
u	novel	0.0138341	-0.0724992	NW_004973192.1	.	597930	599822	MSTRG.1137.1	1	1893	MSTRG.1137
x	novel	0.00535225	-0.0098304	NW_004973359.1	+	277337	277679	MSTRG.11372.1	2	280	MSTRG.11372
i	novel	0.209171	-0.0831488	NW_004973359.1	-	376972	377909	MSTRG.11379.1	1	938	MSTRG.11379
u	novel	0.0750408	-0.0462848	NW_004973192.1	.	614884	620325	MSTRG.1139.1	1	5442	MSTRG.1139
u	novel	0.088847	-0.104858	NW_004973359.1	+	601254	602208	MSTRG.11398.1	2	364	MSTRG.11398
u	novel	0.106856	-0.079872	NW_004973359.1	+	601382	602221	MSTRG.11398.2	2	676	MSTRG.11398
u	novel	0.0261606	-0.0671744	NW_004973359.1	.	705334	705883	MSTRG.11407.1	1	550	MSTRG.11407
u	novel	0.0324059	-0.0278528	NW_004973359.1	+	741905	742995	MSTRG.11414.1	2	1000	MSTRG.11414
u	novel	0.0646714	-0.004096	NW_004973359.1	.	744092	744616	MSTRG.11415.1	1	525	MSTRG.11415
i	novel	0.031552	-0.028672	NW_004973359.1	.	1106481	1106796	MSTRG.11421.1	1	316	MSTRG.11421
u	novel	0.111789	-0.086016	NW_004973359.1	.	1162929	1163983	MSTRG.11427.1	1	1055	MSTRG.11427
u	novel	0.276096	-0.0499712	NW_004973359.1	+	1264791	1265634	MSTRG.11438.1	2	787	MSTRG.11438
o	novel	0.0426265	-0.0385024	NW_004973359.1	-	759925	1061913	MSTRG.11447.1	2	3056	MSTRG.11447
x	novel	0.118558	-0.0442368	NW_004973359.1	+	796522	799697	MSTRG.11449.1	2	3136	MSTRG.11449
x	novel	0.00623992	-0.0540672	NW_004973359.1	+	845317	845720	MSTRG.11452.1	2	364	MSTRG.11452
x	novel	0.0715022	-0.053248	NW_004973359.1	+	856620	857174	MSTRG.11454.1	3	446	MSTRG.11454
x	novel	0.00688461	-0.053248	NW_004973359.1	-	993574	993841	MSTRG.11462.1	2	217	MSTRG.11462
u	novel	0.0449107	-0.0004096	NW_004973359.1	-	1001705	1004200	MSTRG.11465.1	2	2408	MSTRG.11465
u	novel	0.0177439	-0.217088	NW_004973359.1	.	1525794	1526142	MSTRG.11469.1	1	349	MSTRG.11469
i	novel	0.00514408	-0.0028672	NW_004973360.1	.	4631	4835	MSTRG.11473.1	1	205	MSTRG.11473
x	novel	0.114955	-0.032768	NW_004973360.1	-	9480	20367	MSTRG.11474.1	2	3490	MSTRG.11474
j	novel	0.0354027	-0.178995	NW_004973361.1	-	1169	4204	MSTRG.11484.2	5	788	MSTRG.11484
u	novel	0.114996	-0.0610304	NW_004973361.1	.	26559	27207	MSTRG.11486.1	1	649	MSTRG.11486
u	novel	0.0465712	-0.004096	NW_004973361.1	.	35674	35911	MSTRG.11487.1	1	238	MSTRG.11487
j	novel	0.466126	-0.145408	NW_004973361.1	+	18523	21020	MSTRG.11488.1	3	1313	MSTRG.11488
u	novel	0.182406	-0.0352256	NW_004973364.1	+	1	11149	MSTRG.11491.1	3	11006	MSTRG.11491
j	novel	0.0194072	-0.0028672	NW_004973363.1	+	244412	438456	MSTRG.11495.2	4	758	MSTRG.11495
j	novel	0.0202601	-0.032768	NW_004973363.1	+	244524	281991	MSTRG.11495.3	3	1176	MSTRG.11495
i	novel	0.0507516	-0.0004096	NW_004973363.1	.	430827	431038	MSTRG.11496.1	1	212	MSTRG.11496
i	novel	0.245259	-0.0077824	NW_004973363.1	.	601497	602077	MSTRG.11499.1	1	581	MSTRG.11499
i	novel	0.0205655	-0.0004096	NW_004973363.1	+	853338	854512	MSTRG.11503.1	2	1030	MSTRG.11503
i	novel	0.159083	-0.008192	NW_004973363.1	-	854286	882988	MSTRG.11504.1	4	28410	MSTRG.11504
i	novel	0.0663588	-0.135168	NW_004973363.1	-	901099	909545	MSTRG.11505.1	2	8365	MSTRG.11505
i	novel	0.110415	-0.0180224	NW_004973363.1	-	966843	1002645	MSTRG.11506.1	2	10457	MSTRG.11506
u	novel	0.178621	-0.0651264	NW_004973365.1	.	639037	639463	MSTRG.11515.1	1	427	MSTRG.11515
j	novel	0.154519	-0.0270336	NW_004973365.1	+	1781230	1803495	MSTRG.11521.18	2	15734	MSTRG.11521
i	novel	0.0530049	-0.04096	NW_004973365.1	.	1768218	1769340	MSTRG.11522.1	1	1123	MSTRG.11522
u	novel	0.0310129	-0.0548864	NW_004973365.1	.	1812657	1813006	MSTRG.11523.1	1	350	MSTRG.11523
i	novel	0.339606	-0.0270336	NW_004973366.1	.	766615	768934	MSTRG.11527.1	1	2320	MSTRG.11527
i	novel	0.0229455	-0.065536	NW_004973192.1	.	1070524	1071177	MSTRG.1153.1	1	654	MSTRG.1153
i	novel	0.0367822	-0.069632	NW_004973366.1	-	262252	263438	MSTRG.11532.1	2	1133	MSTRG.11532
j	novel	0.329424	-0.0262144	NW_004973366.1	+	444448	467922	MSTRG.11541.5	6	2531	MSTRG.11541
i	novel	0.0348103	-0.0004096	NW_004973366.1	+	1005137	1006031	MSTRG.11546.1	2	828	MSTRG.11546
i	novel	0.0522717	-0.124928	NW_004973366.1	+	1022112	1023608	MSTRG.11548.1	2	1416	MSTRG.11548
i	novel	0.245276	-0.0823296	NW_004973367.1	-	118251	119227	MSTRG.11553.1	2	557	MSTRG.11553
x	novel	0.0465975	-0.233472	NW_004973367.1	+	55770	57206	MSTRG.11564.1	2	354	MSTRG.11564
i	novel	0.0690947	-0.0151552	NW_004973368.1	+	75555	78379	MSTRG.11568.1	2	2780	MSTRG.11568
i	novel	0.0245051	-0.0004096	NW_004973192.1	.	1367428	1367656	MSTRG.1157.1	1	229	MSTRG.1157
x	novel	0.0224893	-0.0069632	NW_004973368.1	-	198372	201551	MSTRG.11574.1	2	3100	MSTRG.11574
x	novel	0.0224893	-0.0069632	NW_004973368.1	-	198372	201392	MSTRG.11574.2	2	2941	MSTRG.11574
j	novel	0.138159	-0.045056	NW_004973368.1	+	238498	259388	MSTRG.11575.5	4	1089	MSTRG.11575
j	novel	0.0501266	-0.0188416	NW_004973368.1	-	540684	591279	MSTRG.11576.3	3	2372	MSTRG.11576
j	novel	0.156804	-0.032768	NW_004973368.1	-	550125	590430	MSTRG.11576.4	3	878	MSTRG.11576
j	novel	0.0415941	-0.016384	NW_004973368.1	-	589079	591279	MSTRG.11576.5	2	1870	MSTRG.11576
i	novel	0.031274	-0.118784	NW_004973368.1	.	378654	381104	MSTRG.11577.1	1	2451	MSTRG.11577
x	novel	0.053459	-0.0172032	NW_004973368.1	-	1077686	1083339	MSTRG.11585.1	3	2188	MSTRG.11585
x	novel	0.028539	-0.0352256	NW_004973368.1	-	1077910	1083275	MSTRG.11585.2	4	985	MSTRG.11585
j	novel	0.0401413	-0.004096	NW_004973368.1	+	1083314	1092073	MSTRG.11586.3	3	1903	MSTRG.11586
u	novel	0.0738622	-0.008192	NW_004973368.1	-	1087877	1090263	MSTRG.11587.1	2	2329	MSTRG.11587
i	novel	0.133047	-0.0606208	NW_004973369.1	+	88486	107143	MSTRG.11597.1	6	18078	MSTRG.11597
i	novel	0.0713487	-0.0270336	NW_004973369.1	+	100987	107172	MSTRG.11597.2	3	5628	MSTRG.11597
x	novel	0.0788906	-0.0770048	NW_004973369.1	+	338814	340150	MSTRG.11608.1	2	1282	MSTRG.11608
u	novel	0.00632885	-0.047104	NW_004973369.1	-	372208	373000	MSTRG.11614.1	2	736	MSTRG.11614
u	novel	0.0964763	-0.0397312	NW_004973369.1	-	1205314	1208220	MSTRG.11650.1	1	2907	MSTRG.11650
j	novel	0.295252	-0.157696	NW_004973369.1	+	1218735	1224485	MSTRG.11657.1	4	1521	MSTRG.11657
u	novel	0.0891429	-0.0827392	NW_004973369.1	.	1286745	1288418	MSTRG.11660.1	1	1674	MSTRG.11660
x	novel	0.02199	-0.0114688	NW_004973369.1	-	1832676	1832943	MSTRG.11676.1	2	235	MSTRG.11676
j	novel	0.103706	-0.04096	NW_004973369.1	+	2187973	2271484	MSTRG.11695.4	7	4820	MSTRG.11695
i	novel	0.0835079	-0.0401408	NW_004973192.1	+	1734883	1735201	MSTRG.1170.1	1	319	MSTRG.1170
u	novel	0.0241887	-0.113459	NW_004973369.1	.	2566591	2567602	MSTRG.11711.1	1	1012	MSTRG.11711
j	novel	0.287631	-0.0024576	NW_004973369.1	+	2583473	2593262	MSTRG.11712.2	3	1507	MSTRG.11712
u	novel	0.354437	-0.0004096	NW_004973369.1	-	2593356	2596571	MSTRG.11714.1	2	3091	MSTRG.11714
x	novel	0.0544388	-0.13271	NW_004973369.1	+	2740987	2745225	MSTRG.11720.1	2	4184	MSTRG.11720
x	novel	0.0544388	-0.148685	NW_004973369.1	+	2741003	2745225	MSTRG.11720.2	2	4168	MSTRG.11720
j	novel	0.416011	-0.022528	NW_004973369.1	-	2748735	2773420	MSTRG.11721.3	11	4184	MSTRG.11721
j	novel	0.2484	-0.167936	NW_004973369.1	-	2758837	2767463	MSTRG.11721.5	3	6746	MSTRG.11721
j	novel	0.464799	-0.0565248	NW_004973369.1	-	2789880	2802309	MSTRG.11725.1	7	2165	MSTRG.11725
j	novel	0.226756	-0.0356352	NW_004973369.1	-	3141927	3151630	MSTRG.11735.2	2	1763	MSTRG.11735
x	novel	0.167603	-0.0008192	NW_004973369.1	-	3300422	3300681	MSTRG.11742.1	2	224	MSTRG.11742
x	novel	0.00912278	-0.0004096	NW_004973369.1	-	3308402	3308726	MSTRG.11743.1	2	274	MSTRG.11743
i	novel	0.0240193	-0.0004096	NW_004973370.1	-	39748	40884	MSTRG.11767.1	2	1069	MSTRG.11767
i	novel	0.302413	-0.04096	NW_004973370.1	-	331579	333905	MSTRG.11769.1	2	2263	MSTRG.11769
i	novel	0.116774	-0.024576	NW_004973370.1	+	456934	458404	MSTRG.11771.1	1	1471	MSTRG.11771
i	novel	0.407467	-0.0028672	NW_004973370.1	+	494523	498090	MSTRG.11772.1	1	3568	MSTRG.11772
u	novel	0.0235329	-0.0004096	NW_004973370.1	.	700489	700762	MSTRG.11774.1	1	274	MSTRG.11774
u	novel	0.0358113	-0.049152	NW_004973370.1	.	752731	753141	MSTRG.11775.1	1	411	MSTRG.11775
x	novel	0.0103098	-0.0401408	NW_004973370.1	-	557443	557772	MSTRG.11778.1	2	246	MSTRG.11778
i	novel	0.0999362	-0.057344	NW_004973370.1	-	640381	645744	MSTRG.11780.1	4	5110	MSTRG.11780
i	novel	0.0961228	-0.4096	NW_004973370.1	+	641710	645745	MSTRG.11781.1	3	3885	MSTRG.11781
i	novel	0.0971753	-0.0577536	NW_004973370.1	+	773040	777731	MSTRG.11788.1	2	4609	MSTRG.11788
u	novel	0.060254	-0.049152	NW_004973370.1	-	979053	982131	MSTRG.11794.1	2	2994	MSTRG.11794
u	novel	0.0225319	-0.0212992	NW_004973370.1	+	1280807	1282067	MSTRG.11799.1	2	1179	MSTRG.11799
o	novel	0.0852803	-0.057344	NW_004973178.1	+	354936	433284	MSTRG.118.1	2	309	MSTRG.118
j	novel	0.0336504	-0.0004096	NW_004973192.1	+	2404126	2423809	MSTRG.1180.6	7	2602	MSTRG.1180
j	novel	0.122409	-0.0004096	NW_004973192.1	+	2404341	2425062	MSTRG.1180.7	6	3340	MSTRG.1180
j	novel	0.149322	-0.0004096	NW_004973192.1	+	2404349	2425083	MSTRG.1180.8	7	2414	MSTRG.1180
o	novel	0.0807787	-0.0995328	NW_004973370.1	+	1409926	1491926	MSTRG.11803.1	2	6379	MSTRG.11803
x	novel	0.0281021	-0.028672	NW_004973370.1	+	1463435	1463754	MSTRG.11808.1	2	239	MSTRG.11808
u	novel	0.0710306	-0.004096	NW_004973370.1	+	1465349	1466904	MSTRG.11809.1	2	1513	MSTRG.11809
u	novel	0.147487	-0.057344	NW_004973370.1	-	1465453	1481256	MSTRG.11810.1	3	13483	MSTRG.11810
u	novel	0.0393912	-0.0004096	NW_004973370.1	-	1465487	1481254	MSTRG.11810.2	2	1408	MSTRG.11810
i	novel	0.0335212	-0.036864	NW_004973370.1	.	1854968	1855351	MSTRG.11814.1	1	384	MSTRG.11814
u	novel	0.023253	-0.053248	NW_004973370.1	.	1528014	1528271	MSTRG.11816.1	1	258	MSTRG.11816
j	novel	0.049401	-0.0188416	NW_004973370.1	+	1690898	1750685	MSTRG.11821.2	5	1156	MSTRG.11821
j	novel	0.0647306	-0.057344	NW_004973370.1	+	1728180	1750688	MSTRG.11821.5	3	1037	MSTRG.11821
j	novel	0.0329795	-0.014336	NW_004973370.1	+	1748687	1750683	MSTRG.11821.6	3	1413	MSTRG.11821
j	novel	0.0390653	-0.057344	NW_004973370.1	+	1749336	1750686	MSTRG.11821.7	2	918	MSTRG.11821
x	novel	0.253405	-0.026624	NW_004973370.1	+	1725242	1726483	MSTRG.11822.1	2	1204	MSTRG.11822
j	novel	0.120254	-0.0524288	NW_004973370.1	-	1753304	1759547	MSTRG.11824.2	2	5283	MSTRG.11824
j	novel	0.361365	-0.0536576	NW_004973370.1	-	1753304	1757677	MSTRG.11824.3	2	3710	MSTRG.11824
i	novel	0.057052	-0.0811008	NW_004973370.1	.	1816493	1816832	MSTRG.11829.1	1	340	MSTRG.11829
i	novel	0.0464307	-0.0475136	NW_004973370.1	-	1892532	1894750	MSTRG.11833.1	2	2155	MSTRG.11833
o	novel	0.0153878	-0.212992	NW_004973370.1	-	1946380	2077668	MSTRG.11837.1	2	389	MSTRG.11837
i	novel	0.155977	-0.0319488	NW_004973370.1	-	1949415	1953395	MSTRG.11838.1	2	3883	MSTRG.11838
i	novel	0.138831	-0.0446464	NW_004973370.1	+	1953494	1960689	MSTRG.11839.1	2	7174	MSTRG.11839
u	novel	0.17856	-0.0684032	NW_004973370.1	-	2033465	2052848	MSTRG.11844.1	2	19230	MSTRG.11844
u	novel	0.17856	-0.0684032	NW_004973370.1	-	2035266	2052854	MSTRG.11844.2	2	17340	MSTRG.11844
u	novel	0.17856	-0.0684032	NW_004973370.1	-	2035292	2052833	MSTRG.11844.3	2	17272	MSTRG.11844
u	novel	0.295279	-0.028672	NW_004973370.1	.	2124282	2124538	MSTRG.11845.1	1	257	MSTRG.11845
u	novel	0.12325	-0.0004096	NW_004973370.1	.	2155120	2155621	MSTRG.11846.1	1	502	MSTRG.11846
j	novel	0.172176	-0.500531	NW_004973370.1	-	2190082	2216134	MSTRG.11847.2	2	1159	MSTRG.11847
u	novel	0.0130011	-0.004096	NW_004973192.1	.	2477809	2478278	MSTRG.1185.1	1	470	MSTRG.1185
i	novel	0.0747293	-0.028672	NW_004973370.1	.	2311504	2312031	MSTRG.11851.1	1	528	MSTRG.11851
i	novel	0.0838391	-0.0004096	NW_004973370.1	+	2361974	2363372	MSTRG.11853.1	2	1330	MSTRG.11853
i	novel	0.0156797	-0.094208	NW_004973370.1	+	2491164	2491500	MSTRG.11854.1	1	337	MSTRG.11854
x	novel	0.0367267	-0.0233472	NW_004973370.1	+	2553216	2553866	MSTRG.11857.1	3	521	MSTRG.11857
j	novel	0.0574182	-0.008192	NW_004973370.1	-	2597100	2603902	MSTRG.11858.10	2	5036	MSTRG.11858
j	novel	0.217121	-0.212992	NW_004973370.1	-	2592682	2603902	MSTRG.11858.2	4	2924	MSTRG.11858
j	novel	0.0646414	-0.0393216	NW_004973370.1	-	2595025	2603876	MSTRG.11858.4	3	2584	MSTRG.11858
j	novel	0.17528	-0.0393216	NW_004973370.1	-	2595047	2603876	MSTRG.11858.7	4	1053	MSTRG.11858
i	novel	0.0189748	-0.0004096	NW_004973371.1	.	13030	13905	MSTRG.11861.1	1	876	MSTRG.11861
i	novel	0.0370707	-0.0004096	NW_004973371.1	.	17517	17723	MSTRG.11862.1	1	207	MSTRG.11862
u	novel	0.0159346	-0.0811008	NW_004973371.1	.	20922	21202	MSTRG.11863.1	1	281	MSTRG.11863
x	novel	0.0649694	-0.032768	NW_004973370.1	+	2776801	2779573	MSTRG.11867.1	2	2709	MSTRG.11867
i	novel	0.114429	-0.0172032	NW_004973370.1	-	2853599	2860220	MSTRG.11869.1	2	2637	MSTRG.11869
j	novel	0.0532389	-0.012288	NW_004973370.1	+	2996573	3004844	MSTRG.11872.3	2	4246	MSTRG.11872
i	novel	0.0844291	-0.0004096	NW_004973370.1	.	3017999	3018216	MSTRG.11873.1	1	218	MSTRG.11873
x	novel	0.0324634	-0.0172032	NW_004973370.1	+	3041631	3083259	MSTRG.11876.1	4	2784	MSTRG.11876
j	novel	0.0176768	-0.0356352	NW_004973371.1	+	405316	412711	MSTRG.11884.1	3	1252	MSTRG.11884
u	novel	0.394837	-0.0618496	NW_004973371.1	-	708588	718778	MSTRG.11885.1	3	683	MSTRG.11885
u	novel	0.0481307	-0.008192	NW_004973371.1	-	715227	718770	MSTRG.11885.2	2	809	MSTRG.11885
i	novel	0.0291544	-0.0311296	NW_004973371.1	-	601537	602932	MSTRG.11890.1	2	1349	MSTRG.11890
i	novel	0.190991	-0.036864	NW_004973371.1	+	602166	605918	MSTRG.11891.1	1	3753	MSTRG.11891
x	novel	0.0439877	-0.0049152	NW_004973371.1	+	620167	621306	MSTRG.11893.1	2	1049	MSTRG.11893
u	novel	0.0460723	-0.0237568	NW_004973371.1	.	631610	634313	MSTRG.11894.1	1	2704	MSTRG.11894
u	novel	0.0169262	-0.0004096	NW_004973371.1	.	654442	655074	MSTRG.11895.1	1	633	MSTRG.11895
i	novel	0.0255873	-0.069632	NW_004973371.1	.	662564	663830	MSTRG.11897.1	1	1267	MSTRG.11897
u	novel	0.163854	-0.016384	NW_004973371.1	.	666212	666922	MSTRG.11898.1	1	711	MSTRG.11898
u	novel	0.0788269	-0.090112	NW_004973371.1	.	1393522	1394651	MSTRG.11905.1	1	1130	MSTRG.11905
u	novel	0.274893	-0.055296	NW_004973372.1	.	2920	5916	MSTRG.11907.1	1	2997	MSTRG.11907
u	novel	0.0237741	-0.008192	NW_004973372.1	+	174225	175136	MSTRG.11908.1	1	912	MSTRG.11908
i	novel	0.0265118	-0.02048	NW_004973372.1	-	608549	611376	MSTRG.11915.1	3	2617	MSTRG.11915
i	novel	0.12766	-0.012288	NW_004973372.1	-	1224487	1228152	MSTRG.11917.1	2	3575	MSTRG.11917
u	novel	0.00965092	-0.028672	NW_004973372.1	.	885612	886117	MSTRG.11922.1	1	506	MSTRG.11922
i	novel	0.0867457	-0.0237568	NW_004973372.1	+	991992	1000460	MSTRG.11924.1	2	8397	MSTRG.11924
u	novel	0.057798	-0.0352256	NW_004973372.1	+	1027666	1030850	MSTRG.11925.1	2	3129	MSTRG.11925
u	novel	0.222133	-0.032768	NW_004973373.1	.	412683	415054	MSTRG.11932.1	1	2372	MSTRG.11932
i	novel	0.146707	-0.036864	NW_004973373.1	.	435462	439136	MSTRG.11934.1	1	3675	MSTRG.11934
i	novel	0.121707	-0.0495616	NW_004973373.1	.	449835	451191	MSTRG.11935.1	1	1357	MSTRG.11935
u	novel	0.0969033	-0.0720896	NW_004973373.1	.	456613	457500	MSTRG.11936.1	1	888	MSTRG.11936
u	novel	0.0385083	-0.008192	NW_004973373.1	+	460245	461151	MSTRG.11937.1	2	799	MSTRG.11937
u	novel	0.0608039	-0.0233472	NW_004973373.1	+	1	12120	MSTRG.11938.1	3	9299	MSTRG.11938
j	novel	0.0922737	-0.026624	NW_004973373.1	-	51630	89982	MSTRG.11939.11	3	17075	MSTRG.11939
j	novel	0.092786	-0.026624	NW_004973373.1	-	53303	71413	MSTRG.11939.12	3	15396	MSTRG.11939
o	novel	0.0947499	-0.0823296	NW_004973373.1	-	6052	29910	MSTRG.11939.2	2	3336	MSTRG.11939
o	novel	0.370135	-0.0028672	NW_004973373.1	-	12182	39395	MSTRG.11939.3	2	6884	MSTRG.11939
u	novel	0.285449	-0.0024576	NW_004973373.1	+	99644	103731	MSTRG.11941.1	2	4005	MSTRG.11941
u	novel	1.35115e-05	-0.028672	NW_004973373.1	.	172520	172829	MSTRG.11942.1	1	310	MSTRG.11942
u	novel	0.00718366	-0.0004096	NW_004973373.1	.	356322	356701	MSTRG.11946.1	1	380	MSTRG.11946
u	novel	0.202501	-0.0200704	NW_004973373.1	+	406671	412413	MSTRG.11947.1	1	5743	MSTRG.11947
u	novel	0.0917283	-0.0004096	NW_004973373.1	.	469129	469415	MSTRG.11950.1	1	287	MSTRG.11950
u	novel	0.0504681	-0.0004096	NW_004973373.1	.	477213	477919	MSTRG.11951.1	1	707	MSTRG.11951
u	novel	0.0215579	-0.043008	NW_004973373.1	-	482485	484276	MSTRG.11952.1	2	1721	MSTRG.11952
u	novel	0.21363	-0.0016384	NW_004973373.1	+	484387	506017	MSTRG.11953.1	2	6890	MSTRG.11953
u	novel	0.116702	-0.036864	NW_004973373.1	-	496585	501127	MSTRG.11954.1	1	4543	MSTRG.11954
u	novel	0.0332991	-0.0004096	NW_004973373.1	-	525045	526658	MSTRG.11956.1	2	1547	MSTRG.11956
x	novel	0.157163	-0.0339968	NW_004973373.1	+	526719	532862	MSTRG.11957.1	3	5994	MSTRG.11957
i	novel	0.302475	-0.0057344	NW_004973373.1	+	591020	592804	MSTRG.11963.1	2	1684	MSTRG.11963
i	novel	0.166822	-0.04096	NW_004973373.1	+	782090	785770	MSTRG.11968.1	2	1240	MSTRG.11968
i	novel	0.23576	-0.0585728	NW_004973373.1	.	1141898	1143054	MSTRG.11971.1	1	1157	MSTRG.11971
i	novel	0.0030134	-0.0004096	NW_004973373.1	.	1519871	1520107	MSTRG.11977.1	1	237	MSTRG.11977
i	novel	0.0241437	-0.008192	NW_004973373.1	+	1587830	1588145	MSTRG.11978.1	1	316	MSTRG.11978
i	novel	0.0406138	-0.0958464	NW_004973373.1	.	1609954	1610158	MSTRG.11979.1	1	205	MSTRG.11979
i	novel	0.119267	-0.0376832	NW_004973373.1	.	1717769	1718046	MSTRG.11981.1	1	278	MSTRG.11981
i	novel	0.0104273	-0.22528	NW_004973373.1	.	2377240	2377706	MSTRG.11985.1	1	467	MSTRG.11985
i	novel	0.0932519	-0.0958464	NW_004973373.1	.	2495633	2496141	MSTRG.11986.1	1	509	MSTRG.11986
x	novel	0.0720423	-0.028672	NW_004973192.1	+	2620555	2635153	MSTRG.1199.1	3	3257	MSTRG.1199
u	novel	0.0124874	-0.0315392	NW_004973373.1	.	3355270	3355771	MSTRG.11991.1	1	502	MSTRG.11991
u	novel	0.0128587	-0.06144	NW_004973373.1	.	3419410	3419813	MSTRG.11992.1	1	404	MSTRG.11992
u	novel	0.0524312	-0.04096	NW_004973373.1	.	3630664	3631056	MSTRG.11993.1	1	393	MSTRG.11993
u	novel	0.0488921	-0.114278	NW_004973373.1	.	3699664	3699918	MSTRG.11994.1	1	255	MSTRG.11994
o	novel	0.127924	-0.0688128	NW_004973375.1	-	103094	117813	MSTRG.11999.1	3	14579	MSTRG.11999
o	novel	0.225811	-0.012288	NW_004973375.1	+	108981	123913	MSTRG.12000.2	2	14848	MSTRG.12000
i	novel	0.0548989	-0.004096	NW_004973375.1	-	348796	352841	MSTRG.12002.1	2	3969	MSTRG.12002
j	novel	0.0350399	-0.0131072	NW_004973375.1	-	137993	155139	MSTRG.12006.1	2	1928	MSTRG.12006
j	novel	0.164989	-0.077824	NW_004973375.1	-	140718	155139	MSTRG.12006.3	3	762	MSTRG.12006
j	novel	0.165874	-0.077824	NW_004973375.1	-	140718	155139	MSTRG.12006.4	2	533	MSTRG.12006
j	novel	0.033146	-0.0110592	NW_004973375.1	-	140718	155139	MSTRG.12006.5	4	965	MSTRG.12006
j	novel	0.0596613	-0.034816	NW_004973375.1	-	149855	155139	MSTRG.12006.7	3	1780	MSTRG.12006
x	novel	0.0226529	-0.049152	NW_004973375.1	+	196015	197213	MSTRG.12009.1	2	1123	MSTRG.12009
u	novel	0.00853654	-0.008192	NW_004973375.1	.	333209	333566	MSTRG.12011.1	1	358	MSTRG.12011
j	novel	0.0207768	-0.0536576	NW_004973375.1	+	710970	721536	MSTRG.12014.10	8	1069	MSTRG.12014
j	novel	0.108857	-0.0536576	NW_004973375.1	+	710921	721536	MSTRG.12014.9	7	1051	MSTRG.12014
x	novel	0.0100812	-0.0004096	NW_004973375.1	-	1125639	1126830	MSTRG.12019.1	2	1156	MSTRG.12019
j	novel	0.0571141	-0.016384	NW_004973192.1	+	2762539	2851479	MSTRG.1202.2	4	2077	MSTRG.1202
j	novel	0.0644943	-0.0479232	NW_004973192.1	+	2762539	2849018	MSTRG.1202.3	4	764	MSTRG.1202
u	novel	0.141044	-0.01024	NW_004973375.1	-	1096569	1097842	MSTRG.12022.1	1	1274	MSTRG.12022
i	novel	0.0327065	-0.032768	NW_004973192.1	.	2851577	2853454	MSTRG.1203.1	1	1878	MSTRG.1203
j	novel	0.0493494	-0.012288	NW_004973375.1	+	1346814	1351268	MSTRG.12030.10	3	1555	MSTRG.12030
u	novel	0.0648675	-0.069632	NW_004973375.1	+	1974565	1977799	MSTRG.12041.1	1	3235	MSTRG.12041
j	novel	0.0322365	-0.0172032	NW_004973375.1	+	1714287	1862173	MSTRG.12043.12	3	4397	MSTRG.12043
j	novel	0.0699844	-0.0004096	NW_004973375.1	+	1714294	1734812	MSTRG.12043.13	3	2669	MSTRG.12043
j	novel	0.110454	-0.012288	NW_004973375.1	+	1714191	1781534	MSTRG.12043.2	3	2182	MSTRG.12043
j	novel	0.0505041	-0.098304	NW_004973375.1	+	2025986	2079109	MSTRG.12046.10	3	3449	MSTRG.12046
j	novel	0.0505041	-0.098304	NW_004973375.1	+	2025986	2079109	MSTRG.12046.11	3	3511	MSTRG.12046
j	novel	0.0505041	-0.098304	NW_004973375.1	+	2025957	2079109	MSTRG.12046.7	4	3553	MSTRG.12046
j	novel	0.0483807	-0.098304	NW_004973375.1	+	2025957	2079109	MSTRG.12046.8	2	3372	MSTRG.12046
u	novel	0.0296225	-0.0802816	NW_004973375.1	+	2186907	2269154	MSTRG.12048.1	3	1534	MSTRG.12048
u	novel	0.0294255	-0.0462848	NW_004973375.1	+	2186987	2440352	MSTRG.12048.2	3	1729	MSTRG.12048
u	novel	0.0362957	-0.0446464	NW_004973375.1	+	2491404	2495572	MSTRG.12049.1	3	1631	MSTRG.12049
u	novel	0.0144726	-0.0004096	NW_004973375.1	.	2568246	2568450	MSTRG.12053.1	1	205	MSTRG.12053
i	novel	0.122524	-0.0483328	NW_004973375.1	-	2676924	2680147	MSTRG.12056.1	1	3224	MSTRG.12056
i	novel	0.0644591	-0.0425984	NW_004973375.1	+	2676924	2680147	MSTRG.12057.1	1	3224	MSTRG.12057
i	novel	0.00990314	-0.0217088	NW_004973375.1	+	2678780	2680146	MSTRG.12057.2	2	1306	MSTRG.12057
i	novel	0.311614	-0.069632	NW_004973375.1	+	2682038	2682553	MSTRG.12058.1	2	470	MSTRG.12058
x	novel	0.0724685	-0.0008192	NW_004973375.1	+	2694427	2696654	MSTRG.12059.1	2	2161	MSTRG.12059
x	novel	0.0794059	-0.0008192	NW_004973375.1	+	2694427	2696654	MSTRG.12059.2	3	2099	MSTRG.12059
u	novel	0.00767961	-0.049152	NW_004973376.1	.	223	676	MSTRG.12067.1	1	454	MSTRG.12067
u	novel	0.0105567	-0.049152	NW_004973376.1	.	2889	3139	MSTRG.12068.1	1	251	MSTRG.12068
j	novel	0.0317417	-0.012288	NW_004973375.1	-	3547789	3572007	MSTRG.12072.1	2	775	MSTRG.12072
u	novel	0.00755499	-0.008192	NW_004973376.1	+	7853	8079	MSTRG.12074.1	1	227	MSTRG.12074
u	novel	0.0270516	-0.036864	NW_004973376.1	-	8867	9530	MSTRG.12075.1	1	664	MSTRG.12075
i	novel	0.0085648	-0.004096	NW_004973377.1	.	101345	101875	MSTRG.12079.1	1	531	MSTRG.12079
u	novel	0.163427	-0.0397312	NW_004973192.1	-	3592913	3600162	MSTRG.1208.1	2	1427	MSTRG.1208
u	novel	0.00598388	-0.0004096	NW_004973377.1	.	380024	380245	MSTRG.12087.1	1	222	MSTRG.12087
i	novel	0.0994668	-0.138035	NW_004973377.1	.	539087	539431	MSTRG.12089.1	1	345	MSTRG.12089
u	novel	0.118992	-0.110182	NW_004973377.1	.	261904	262124	MSTRG.12091.1	1	221	MSTRG.12091
u	novel	0.363969	-0.049152	NW_004973377.1	.	1442837	1443576	MSTRG.12105.1	1	740	MSTRG.12105
u	novel	0.00810125	-0.036864	NW_004973377.1	.	1994067	1994731	MSTRG.12110.1	1	665	MSTRG.12110
u	novel	0.0158449	-0.024576	NW_004973377.1	.	2005280	2005657	MSTRG.12111.1	1	378	MSTRG.12111
o	novel	0.127116	-0.036864	NW_004973377.1	-	2109778	2170120	MSTRG.12119.1	2	229	MSTRG.12119
u	novel	0.00433605	-0.0004096	NW_004973377.1	.	2274259	2274519	MSTRG.12123.1	1	261	MSTRG.12123
i	novel	0.139891	-0.04096	NW_004973377.1	.	2546053	2546253	MSTRG.12130.1	1	201	MSTRG.12130
u	novel	0.0480618	-0.036864	NW_004973377.1	.	2764940	2765845	MSTRG.12136.1	1	906	MSTRG.12136
u	novel	0.017648	-0.147456	NW_004973377.1	.	2863306	2863664	MSTRG.12137.1	1	359	MSTRG.12137
u	novel	0.308263	-0.0671744	NW_004973377.1	.	3339640	3340065	MSTRG.12138.1	1	426	MSTRG.12138
u	novel	0.0143269	-0.0733184	NW_004973192.1	.	3630625	3632494	MSTRG.1214.1	1	1870	MSTRG.1214
i	novel	0.05935	-0.024576	NW_004973377.1	.	3112056	3115838	MSTRG.12140.1	1	3783	MSTRG.12140
i	novel	0.0272008	-0.045056	NW_004973377.1	.	3124210	3124477	MSTRG.12141.1	1	268	MSTRG.12141
i	novel	0.0104112	-0.0090112	NW_004973377.1	.	3233824	3234063	MSTRG.12143.1	1	240	MSTRG.12143
j	novel	0.257605	-0.0851968	NW_004973377.1	-	3412917	3426886	MSTRG.12146.4	4	531	MSTRG.12146
j	novel	0.060819	-0.008192	NW_004973192.1	-	3645729	3660231	MSTRG.1215.7	2	743	MSTRG.1215
u	novel	0.180814	-0.0745472	NW_004973377.1	.	3687720	3688624	MSTRG.12150.1	1	905	MSTRG.12150
i	novel	0.0852909	-0.069632	NW_004973377.1	.	3819743	3820449	MSTRG.12159.1	1	707	MSTRG.12159
i	novel	0.00755603	-0.032768	NW_004973378.1	.	24942	25355	MSTRG.12165.1	1	414	MSTRG.12165
i	novel	0.110503	-0.045056	NW_004973379.1	-	12255	20118	MSTRG.12168.1	2	7808	MSTRG.12168
j	novel	0.25304	-0.04096	NW_004973192.1	-	3771368	3831654	MSTRG.1217.3	6	4238	MSTRG.1217
j	novel	0.485886	-0.04096	NW_004973192.1	-	3771754	3816485	MSTRG.1217.6	6	3530	MSTRG.1217
u	novel	0.0138877	-0.105267	NW_004973379.1	.	907338	907593	MSTRG.12172.1	1	256	MSTRG.12172
i	novel	0.0379924	-0.106496	NW_004973379.1	-	942774	945201	MSTRG.12175.1	2	2302	MSTRG.12175
i	novel	0.0409702	-0.008192	NW_004973379.1	-	942804	945233	MSTRG.12175.2	2	2304	MSTRG.12175
i	novel	0.0158153	-0.0004096	NW_004973379.1	.	946220	947865	MSTRG.12176.1	1	1646	MSTRG.12176
u	novel	0.066659	-0.0679936	NW_004973380.1	+	159601	160018	MSTRG.12181.1	1	418	MSTRG.12181
u	novel	0.0825326	-0.065536	NW_004973380.1	.	372754	373201	MSTRG.12184.1	1	448	MSTRG.12184
u	novel	0.0232026	-0.0028672	NW_004973380.1	.	555557	555802	MSTRG.12185.1	1	246	MSTRG.12185
u	novel	0.0331321	-0.0262144	NW_004973380.1	-	631306	632094	MSTRG.12186.1	2	718	MSTRG.12186
u	novel	0.0305242	-0.004096	NW_004973380.1	+	631665	639342	MSTRG.12187.3	3	1070	MSTRG.12187
u	novel	0.316257	-0.0458752	NW_004973380.1	.	779633	780314	MSTRG.12188.1	1	682	MSTRG.12188
u	novel	0.0186145	-0.06144	NW_004973380.1	.	684587	684836	MSTRG.12189.1	1	250	MSTRG.12189
u	novel	0.139874	-0.0024576	NW_004973382.1	.	15785	16276	MSTRG.12191.1	1	492	MSTRG.12191
u	novel	0.036104	-0.0065536	NW_004973382.1	.	136179	136701	MSTRG.12197.1	1	523	MSTRG.12197
u	novel	0.0378476	-0.0004096	NW_004973382.1	.	169094	171352	MSTRG.12199.1	1	2259	MSTRG.12199
i	novel	0.00788984	-0.053248	NW_004973178.1	+	432655	432873	MSTRG.122.1	1	219	MSTRG.122
i	novel	0.0328187	-0.106496	NW_004973382.1	.	419257	419660	MSTRG.12203.1	1	404	MSTRG.12203
i	novel	0.132919	-0.0507904	NW_004973382.1	.	807580	807953	MSTRG.12213.1	1	374	MSTRG.12213
j	novel	0.340749	-0.008192	NW_004973383.1	+	1	5100	MSTRG.12215.1	3	2467	MSTRG.12215
u	novel	0.0836666	-0.16384	NW_004973383.1	+	177407	225613	MSTRG.12221.3	4	1958	MSTRG.12221
u	novel	0.0576098	-0.0966656	NW_004973383.1	-	380488	381084	MSTRG.12222.1	1	597	MSTRG.12222
j	novel	0.0769651	-0.0745472	NW_004973383.1	-	428492	440479	MSTRG.12225.8	5	660	MSTRG.12225
j	novel	0.0318218	-0.0139264	NW_004973383.1	-	623263	667678	MSTRG.12229.1	4	1470	MSTRG.12229
u	novel	0.0261669	-0.0004096	NW_004973383.1	.	1493139	1493538	MSTRG.12235.1	1	400	MSTRG.12235
u	novel	0.0291969	-0.0016384	NW_004973383.1	.	1952981	1953402	MSTRG.12246.1	1	422	MSTRG.12246
u	novel	0.13008	-0.018432	NW_004973383.1	+	1668969	1777982	MSTRG.12247.10	5	5051	MSTRG.12247
u	novel	0.123371	-0.008192	NW_004973383.1	+	1535929	1708203	MSTRG.12247.2	7	1954	MSTRG.12247
u	novel	0.0796284	-0.008192	NW_004973383.1	+	1535990	1710044	MSTRG.12247.3	6	3627	MSTRG.12247
u	novel	0.0827997	-0.008192	NW_004973383.1	+	1536922	1712073	MSTRG.12247.6	6	5771	MSTRG.12247
u	novel	0.0233034	-0.012288	NW_004973383.1	+	1539160	1584876	MSTRG.12247.8	2	3582	MSTRG.12247
u	novel	0.113933	-0.016384	NW_004973383.1	+	1540810	1652540	MSTRG.12247.9	3	8455	MSTRG.12247
u	novel	0.436467	-0.004096	NW_004973383.1	+	1623480	1633467	MSTRG.12248.1	2	9964	MSTRG.12248
u	novel	0.389733	-0.0032768	NW_004973383.1	.	2235371	2236066	MSTRG.12250.1	1	696	MSTRG.12250
u	novel	0.430367	-0.01024	NW_004973383.1	-	2410184	2453397	MSTRG.12251.1	5	8024	MSTRG.12251
u	novel	0.41904	-0.01024	NW_004973383.1	-	2411188	2421346	MSTRG.12251.2	3	6575	MSTRG.12251
u	novel	0.451028	-0.038912	NW_004973383.1	-	2414151	2453422	MSTRG.12251.3	5	3943	MSTRG.12251
u	novel	0.135558	-0.105677	NW_004973383.1	-	2422345	2453420	MSTRG.12251.4	3	1631	MSTRG.12251
x	novel	0.0192261	-0.0004096	NW_004973383.1	-	2469217	2477661	MSTRG.12253.1	3	351	MSTRG.12253
i	novel	0.0152369	-0.079872	NW_004973383.1	+	2670899	2671375	MSTRG.12263.1	1	477	MSTRG.12263
j	novel	0.0991466	-0.0425984	NW_004973384.1	-	16932	45710	MSTRG.12264.2	3	4633	MSTRG.12264
u	novel	0.040161	-0.016384	NW_004973384.1	-	112678	119583	MSTRG.12265.1	2	1958	MSTRG.12265
u	novel	0.17019	-0.0536576	NW_004973384.1	.	204918	205242	MSTRG.12266.1	1	325	MSTRG.12266
j	novel	0.0288747	-0.057344	NW_004973192.1	-	4243908	4266377	MSTRG.1227.1	10	1862	MSTRG.1227
j	novel	0.0223553	-0.0004096	NW_004973192.1	-	4245817	4266374	MSTRG.1227.2	7	1137	MSTRG.1227
i	novel	0.133271	-0.0380928	NW_004973384.1	+	312285	317172	MSTRG.12271.1	2	4827	MSTRG.12271
j	novel	0.0673691	-0.0077824	NW_004973384.1	+	513355	537156	MSTRG.12274.1	4	3198	MSTRG.12274
j	novel	0.0128108	-0.0864256	NW_004973384.1	-	1041591	1152907	MSTRG.12282.3	4	739	MSTRG.12282
j	novel	0.0250241	-0.0233472	NW_004973384.1	-	1221029	1237237	MSTRG.12285.1	3	738	MSTRG.12285
j	novel	0.0118208	-0.0004096	NW_004973384.1	-	1232991	1237237	MSTRG.12285.5	2	276	MSTRG.12285
u	novel	0.0194771	-0.147456	NW_004973384.1	-	1459029	1463675	MSTRG.12294.1	2	4548	MSTRG.12294
u	novel	0.0463368	-0.0196608	NW_004973384.1	+	1462219	1467552	MSTRG.12295.1	2	5294	MSTRG.12295
u	novel	0.0124838	-0.0004096	NW_004973384.1	.	1467652	1468167	MSTRG.12296.1	1	516	MSTRG.12296
u	novel	0.373772	-0.114688	NW_004973384.1	.	1591137	1598572	MSTRG.12299.1	1	7436	MSTRG.12299
x	novel	0.0675172	-0.028672	NW_004973384.1	-	1689937	1692570	MSTRG.12303.1	2	2547	MSTRG.12303
u	novel	0.028424	-0.0004096	NW_004973385.1	.	438769	438983	MSTRG.12312.1	1	215	MSTRG.12312
u	novel	0.178132	-0.0024576	NW_004973385.1	-	1254496	1266499	MSTRG.12315.1	3	481	MSTRG.12315
i	novel	0.398719	-0.04096	NW_004973385.1	.	1603191	1604888	MSTRG.12330.1	1	1698	MSTRG.12330
j	novel	0.0347938	-0.06144	NW_004973385.1	-	1622741	1628491	MSTRG.12332.1	2	3163	MSTRG.12332
u	novel	0.00975334	-0.06144	NW_004973385.1	.	1646058	1646406	MSTRG.12333.1	1	349	MSTRG.12333
u	novel	0.0814295	-0.0516096	NW_004973385.1	-	1651005	1651341	MSTRG.12334.1	1	337	MSTRG.12334
o	novel	0.102546	-2.03162	NW_004973385.1	-	1651466	1687253	MSTRG.12335.1	2	535	MSTRG.12335
u	novel	0.134295	-0.04096	NW_004973385.1	-	1679434	1683203	MSTRG.12336.1	1	3770	MSTRG.12336
u	novel	0.165036	-0.0356352	NW_004973385.1	-	2023433	2024360	MSTRG.12346.1	1	928	MSTRG.12346
u	novel	0.0842149	-0.0065536	NW_004973385.1	-	2329711	2341699	MSTRG.12353.1	1	11989	MSTRG.12353
u	novel	0.179078	-0.0835584	NW_004973385.1	+	2452874	2484758	MSTRG.12356.1	1	31885	MSTRG.12356
u	novel	0.0274777	-0.0212992	NW_004973192.1	-	5877721	5988652	MSTRG.1237.1	9	2580	MSTRG.1237
u	novel	0.00300928	-0.0004096	NW_004973385.1	.	3055107	3055312	MSTRG.12380.1	1	206	MSTRG.12380
u	novel	0.169847	-0.032768	NW_004973385.1	+	3160490	3217608	MSTRG.12383.1	3	9293	MSTRG.12383
u	novel	0.102974	-0.0262144	NW_004973385.1	-	3210294	3217617	MSTRG.12384.1	1	7324	MSTRG.12384
u	novel	0.0618939	-0.065536	NW_004973385.1	-	3355362	3381765	MSTRG.12388.1	4	3963	MSTRG.12388
u	novel	0.0157009	-0.0049152	NW_004973385.1	.	3434828	3435077	MSTRG.12389.1	1	250	MSTRG.12389
i	novel	0.0523791	-0.094208	NW_004973385.1	+	3509352	3509552	MSTRG.12392.1	1	201	MSTRG.12392
u	novel	0.00814311	-0.073728	NW_004973385.1	-	3809440	3813416	MSTRG.12400.2	2	861	MSTRG.12400
u	novel	0.295007	-0.0270336	NW_004973385.1	.	4398132	4415771	MSTRG.12414.1	1	17640	MSTRG.12414
u	novel	0.022548	-0.03072	NW_004973385.1	.	4534550	4534854	MSTRG.12416.1	1	305	MSTRG.12416
i	novel	0.0187212	-0.045056	NW_004973385.1	.	4558219	4559083	MSTRG.12418.1	1	865	MSTRG.12418
i	novel	0.0109804	-0.0004096	NW_004973385.1	.	4587716	4587976	MSTRG.12419.1	1	261	MSTRG.12419
u	novel	0.0361363	-0.196608	NW_004973192.1	+	5694111	5696045	MSTRG.1242.1	1	1935	MSTRG.1242
u	novel	0.0499163	-0.65536	NW_004973385.1	+	6140610	6145177	MSTRG.12427.1	3	1695	MSTRG.12427
u	novel	0.0135089	-0.012288	NW_004973385.1	+	6140610	6164838	MSTRG.12427.2	6	931	MSTRG.12427
j	novel	0.10461	-0.036864	NW_004973385.1	-	6202619	6219738	MSTRG.12428.2	2	8130	MSTRG.12428
u	novel	0.0901147	-0.055296	NW_004973385.1	-	6471715	6479612	MSTRG.12429.1	2	5762	MSTRG.12429
u	novel	0.00882961	-0.098304	NW_004973385.1	+	6482075	6482695	MSTRG.12430.1	1	621	MSTRG.12430
u	novel	0.0310995	-0.0049152	NW_004973385.1	.	6799175	6801616	MSTRG.12434.1	1	2442	MSTRG.12434
u	novel	0.423216	-0.0241664	NW_004973385.1	.	7228271	7229589	MSTRG.12438.1	1	1319	MSTRG.12438
j	novel	0.0142248	-0.0528384	NW_004973385.1	+	7646842	7656163	MSTRG.12445.5	4	850	MSTRG.12445
u	novel	0.123657	-0.0831488	NW_004973385.1	+	7903352	7907554	MSTRG.12455.1	1	4203	MSTRG.12455
u	novel	0.123657	-0.0831488	NW_004973385.1	+	7903352	7907509	MSTRG.12455.2	2	4132	MSTRG.12455
u	novel	0.100155	-0.008192	NW_004973385.1	.	8311429	8311657	MSTRG.12463.1	1	229	MSTRG.12463
u	novel	0.433159	-0.0135168	NW_004973385.1	.	8418515	8418982	MSTRG.12466.1	1	468	MSTRG.12466
j	novel	0.308317	-0.0753664	NW_004973385.1	+	8422049	8438697	MSTRG.12467.2	3	4216	MSTRG.12467
i	novel	0.147988	-0.012288	NW_004973385.1	+	8461755	8463025	MSTRG.12469.1	1	1271	MSTRG.12469
j	novel	0.0827117	-0.0212992	NW_004973385.1	+	8487111	8505867	MSTRG.12471.3	2	2919	MSTRG.12471
j	novel	0.04275	-0.02048	NW_004973385.1	+	8487111	8505330	MSTRG.12471.4	2	2327	MSTRG.12471
j	novel	0.0136566	-0.0679936	NW_004973385.1	+	8487199	8521325	MSTRG.12471.5	3	244	MSTRG.12471
u	novel	0.0199861	-0.0372736	NW_004973385.1	+	8662736	8665389	MSTRG.12477.1	1	2654	MSTRG.12477
i	novel	0.111983	-0.446464	NW_004973385.1	.	8932547	8935559	MSTRG.12481.1	1	3013	MSTRG.12481
j	novel	0.0161587	-0.014336	NW_004973385.1	+	9119205	9135863	MSTRG.12489.2	3	2297	MSTRG.12489
u	novel	0.0336213	-0.0012288	NW_004973192.1	.	4800548	4801939	MSTRG.1249.1	1	1392	MSTRG.1249
u	novel	0.072279	-0.049152	NW_004973178.1	.	619101	620980	MSTRG.125.1	1	1880	MSTRG.125
j	novel	0.0325157	-0.0352256	NW_004973385.1	+	9396697	9410695	MSTRG.12503.10	3	1390	MSTRG.12503
j	novel	0.449439	-0.004096	NW_004973385.1	-	9648203	9655574	MSTRG.12509.1	4	3089	MSTRG.12509
x	novel	0.0624485	-0.06144	NW_004973192.1	+	4861591	4876699	MSTRG.1251.1	6	2668	MSTRG.1251
x	novel	0.139157	-0.06144	NW_004973192.1	+	4861947	4877261	MSTRG.1251.3	6	802	MSTRG.1251
x	novel	0.461202	-0.28672	NW_004973192.1	+	4861952	4876202	MSTRG.1251.4	5	1699	MSTRG.1251
j	novel	0.0728127	-0.004096	NW_004973385.1	+	9687812	9694703	MSTRG.12512.17	3	1746	MSTRG.12512
j	novel	0.0562374	-0.0094208	NW_004973385.1	+	9687812	9694001	MSTRG.12512.18	5	1166	MSTRG.12512
j	novel	0.0647299	-0.0094208	NW_004973385.1	+	9687820	9694001	MSTRG.12512.22	4	1073	MSTRG.12512
u	novel	0.0208647	-0.0339968	NW_004973385.1	+	9928531	9931402	MSTRG.12517.1	2	2746	MSTRG.12517
u	novel	0.0188795	-0.016384	NW_004973385.1	.	10272058	10272372	MSTRG.12524.1	1	315	MSTRG.12524
u	novel	0.032008	-0.016384	NW_004973385.1	.	10739351	10739643	MSTRG.12527.1	1	293	MSTRG.12527
j	novel	0.298845	-0.155648	NW_004973385.1	+	11184707	11214411	MSTRG.12529.1	3	542	MSTRG.12529
u	novel	0.0166371	-0.02048	NW_004973385.1	.	11441374	11441612	MSTRG.12530.1	1	239	MSTRG.12530
u	novel	0.0424238	-0.0069632	NW_004973385.1	.	11698789	11699481	MSTRG.12532.1	1	693	MSTRG.12532
u	novel	0.106227	-0.0512	NW_004973385.1	.	11786413	11786863	MSTRG.12534.1	1	451	MSTRG.12534
u	novel	0.132778	-0.0004096	NW_004973386.1	.	240036	240530	MSTRG.12535.1	1	495	MSTRG.12535
i	novel	0.0169674	-0.0004096	NW_004973386.1	+	88493	88940	MSTRG.12537.1	2	407	MSTRG.12537
i	novel	0.0654223	-0.0180224	NW_004973386.1	+	105887	108759	MSTRG.12538.1	3	2759	MSTRG.12538
u	novel	0.0888111	-0.004096	NW_004973386.1	.	489187	489419	MSTRG.12542.1	1	233	MSTRG.12542
j	novel	0.401879	-0.0155648	NW_004973388.1	-	10434	24022	MSTRG.12543.1	6	9082	MSTRG.12543
j	novel	0.0661037	-0.0004096	NW_004973388.1	-	17966	24022	MSTRG.12543.3	4	1409	MSTRG.12543
u	novel	0.254017	-0.016384	NW_004973388.1	+	334820	341085	MSTRG.12547.1	3	6063	MSTRG.12547
u	novel	0.0663276	-0.0413696	NW_004973388.1	-	341450	354314	MSTRG.12548.1	2	12810	MSTRG.12548
u	novel	0.0665297	-0.098304	NW_004973388.1	-	341450	344810	MSTRG.12548.2	2	3299	MSTRG.12548
u	novel	0.0648035	-0.1024	NW_004973192.1	+	5031445	5051289	MSTRG.1255.1	2	4623	MSTRG.1255
u	novel	0.0229402	-0.073728	NW_004973388.1	.	387079	387790	MSTRG.12551.1	1	712	MSTRG.12551
u	novel	0.0141121	-0.024576	NW_004973388.1	.	434965	435259	MSTRG.12553.1	1	295	MSTRG.12553
x	novel	0.0709913	-0.012288	NW_004973388.1	+	704284	709283	MSTRG.12554.1	2	4939	MSTRG.12554
u	novel	0.0162035	-0.0004096	NW_004973389.1	.	160	439	MSTRG.12556.1	1	280	MSTRG.12556
u	novel	0.0761963	-0.0147456	NW_004973389.1	.	33404	34359	MSTRG.12557.1	1	956	MSTRG.12557
u	novel	0.0872159	-0.0004096	NW_004973389.1	.	111383	112242	MSTRG.12559.1	1	860	MSTRG.12559
u	novel	0.00363291	-0.0004096	NW_004973389.1	.	311362	311584	MSTRG.12560.1	1	223	MSTRG.12560
u	novel	0.0164057	-0.0004096	NW_004973389.1	.	860757	860979	MSTRG.12565.1	1	223	MSTRG.12565
u	novel	0.0577123	-0.126976	NW_004973389.1	-	558284	560689	MSTRG.12568.1	1	2406	MSTRG.12568
u	novel	0.0738588	-0.0131072	NW_004973389.1	-	562656	564624	MSTRG.12569.1	2	362	MSTRG.12569
u	novel	0.00603071	-0.0004096	NW_004973389.1	.	861375	861757	MSTRG.12572.1	1	383	MSTRG.12572
u	novel	0.018527	-0.02048	NW_004973389.1	.	915678	917138	MSTRG.12573.1	1	1461	MSTRG.12573
u	novel	0.139443	-0.0135168	NW_004973389.1	.	997591	997864	MSTRG.12576.1	1	274	MSTRG.12576
u	novel	0.0031268	-0.172032	NW_004973389.1	.	1014026	1014419	MSTRG.12577.1	1	394	MSTRG.12577
u	novel	0.14685	-0.0065536	NW_004973389.1	.	1138214	1138623	MSTRG.12578.1	1	410	MSTRG.12578
u	novel	0.132598	-0.0004096	NW_004973389.1	.	1389801	1394473	MSTRG.12580.1	1	4673	MSTRG.12580
u	novel	0.0159997	-0.024576	NW_004973389.1	.	1396146	1398587	MSTRG.12581.1	1	2442	MSTRG.12581
u	novel	0.0369972	-0.065536	NW_004973389.1	.	1401818	1406573	MSTRG.12582.1	1	4756	MSTRG.12582
x	novel	0.124471	-0.114688	NW_004973389.1	+	1576496	1594510	MSTRG.12586.1	3	1314	MSTRG.12586
u	novel	0.0237237	-0.0028672	NW_004973389.1	-	2407677	2407882	MSTRG.12588.1	1	206	MSTRG.12588
o	novel	0.141745	-0.032768	NW_004973389.1	-	2408035	2587376	MSTRG.12589.1	2	247	MSTRG.12589
u	novel	0.0219635	-0.024576	NW_004973389.1	.	2120844	2121118	MSTRG.12594.1	1	275	MSTRG.12594
u	novel	0.11494	-0.0540672	NW_004973389.1	.	2811523	2811774	MSTRG.12599.1	1	252	MSTRG.12599
j	novel	0.0904685	-0.073728	NW_004973389.1	+	3216097	3222993	MSTRG.12605.1	4	2648	MSTRG.12605
j	novel	0.0580268	-0.008192	NW_004973389.1	+	3541411	3551887	MSTRG.12611.2	4	7104	MSTRG.12611
j	novel	0.0580268	-0.063488	NW_004973389.1	+	3541411	3551887	MSTRG.12611.3	5	6115	MSTRG.12611
u	novel	0.0250148	-0.004096	NW_004973389.1	+	3809708	3815137	MSTRG.12615.1	4	836	MSTRG.12615
u	novel	0.0528159	-0.0053248	NW_004973389.1	.	4178514	4178782	MSTRG.12619.1	1	269	MSTRG.12619
u	novel	0.0126596	-0.0086016	NW_004973389.1	+	4449834	4450301	MSTRG.12626.1	2	387	MSTRG.12626
u	novel	0.00434274	-0.0004096	NW_004973389.1	.	5001984	5002277	MSTRG.12637.1	1	294	MSTRG.12637
o	novel	0.013984	-0.0004096	NW_004973389.1	-	5157746	5217705	MSTRG.12642.1	2	209	MSTRG.12642
o	novel	0.0138468	-0.0004096	NW_004973389.1	-	5172206	5217704	MSTRG.12642.2	2	232	MSTRG.12642
i	novel	0.0402109	-0.028672	NW_004973389.1	.	5160226	5160925	MSTRG.12643.1	1	700	MSTRG.12643
u	novel	0.00886727	-0.0004096	NW_004973389.1	.	5461143	5461414	MSTRG.12645.1	1	272	MSTRG.12645
u	novel	0.173364	-0.0004096	NW_004973389.1	.	5655040	5655610	MSTRG.12646.1	1	571	MSTRG.12646
u	novel	0.0414705	-0.0151552	NW_004973389.1	.	6213605	6214005	MSTRG.12653.1	1	401	MSTRG.12653
u	novel	0.132752	-0.0401408	NW_004973389.1	.	6282765	6284150	MSTRG.12656.1	1	1386	MSTRG.12656
u	novel	0.0369384	-0.016384	NW_004973389.1	.	6371696	6371997	MSTRG.12657.1	1	302	MSTRG.12657
j	novel	0.139234	-0.067584	NW_004973389.1	+	6945095	6991713	MSTRG.12663.2	4	1908	MSTRG.12663
x	novel	0.219167	-0.0364544	NW_004973390.1	-	90094	94590	MSTRG.12677.1	3	4395	MSTRG.12677
u	novel	0.298259	-0.0516096	NW_004973192.1	.	6192972	6198100	MSTRG.1268.1	1	5129	MSTRG.1268
i	novel	0.0269644	-0.0012288	NW_004973390.1	.	611799	612016	MSTRG.12682.1	1	218	MSTRG.12682
x	novel	0.0204771	-0.118374	NW_004973390.1	-	1202194	1202515	MSTRG.12697.1	2	280	MSTRG.12697
j	novel	0.416217	-0.0270336	NW_004973390.1	+	1238806	1248474	MSTRG.12700.1	5	2130	MSTRG.12700
j	novel	0.0571134	-0.008192	NW_004973390.1	+	1239651	1248474	MSTRG.12700.3	2	6565	MSTRG.12700
u	novel	0.0078117	-0.032768	NW_004973390.1	-	1337326	1338081	MSTRG.12704.1	2	278	MSTRG.12704
i	novel	0.175907	-0.002048	NW_004973390.1	.	1340635	1340894	MSTRG.12706.1	1	260	MSTRG.12706
i	novel	0.287878	-0.0004096	NW_004973390.1	-	1370249	1370582	MSTRG.12714.1	1	334	MSTRG.12714
u	novel	0.053753	-0.181043	NW_004973390.1	-	1444075	1444378	MSTRG.12716.1	2	220	MSTRG.12716
j	novel	0.05028	-0.0086016	NW_004973390.1	+	1471250	1475007	MSTRG.12718.2	4	835	MSTRG.12718
u	novel	0.0130535	-0.188416	NW_004973390.1	.	1583149	1583805	MSTRG.12724.1	1	657	MSTRG.12724
x	novel	0.150587	-0.0401408	NW_004973390.1	+	1551945	1560687	MSTRG.12725.1	2	8670	MSTRG.12725
x	novel	0.00655591	-0.0299008	NW_004973390.1	-	1822292	1822592	MSTRG.12738.1	2	244	MSTRG.12738
j	novel	0.147952	-0.0311296	NW_004973390.1	+	1853020	1855043	MSTRG.12742.1	4	1162	MSTRG.12742
j	novel	0.331355	-0.0704512	NW_004973390.1	+	1853289	1854825	MSTRG.12742.3	4	613	MSTRG.12742
j	novel	0.126558	-0.0479232	NW_004973390.1	+	1853289	1855052	MSTRG.12742.4	4	835	MSTRG.12742
o	novel	0.0151079	-0.0315392	NW_004973192.1	+	6501125	6502258	MSTRG.1275.2	2	1078	MSTRG.1275
o	novel	0.0152084	-0.0098304	NW_004973192.1	+	6501125	6502258	MSTRG.1275.3	2	1101	MSTRG.1275
o	novel	0.0157253	-0.0315392	NW_004973192.1	+	6501125	6502258	MSTRG.1275.4	2	1083	MSTRG.1275
u	novel	0.0679013	-0.024576	NW_004973390.1	+	2533246	2533505	MSTRG.12752.1	1	260	MSTRG.12752
u	novel	0.0932876	-0.0004096	NW_004973390.1	.	2538238	2538573	MSTRG.12753.1	1	336	MSTRG.12753
x	novel	0.235365	-0.131482	NW_004973390.1	-	1999306	2003700	MSTRG.12759.1	2	1201	MSTRG.12759
x	novel	0.00356998	-0.0004096	NW_004973192.1	-	6494498	6502745	MSTRG.1276.1	2	458	MSTRG.1276
x	novel	0.00982679	-0.180634	NW_004973390.1	-	2081751	2084992	MSTRG.12764.1	2	270	MSTRG.12764
x	novel	0.0146235	-0.032768	NW_004973192.1	-	6501125	6502075	MSTRG.1277.1	2	918	MSTRG.1277
i	novel	0.0542283	-0.0569344	NW_004973390.1	.	2414001	2414276	MSTRG.12774.1	1	276	MSTRG.12774
i	novel	0.163049	-0.004096	NW_004973390.1	+	2449360	2451412	MSTRG.12776.1	1	2053	MSTRG.12776
u	novel	0.092676	-0.0294912	NW_004973392.1	+	7279	7994	MSTRG.12780.1	2	618	MSTRG.12780
u	novel	0.0057673	-0.124928	NW_004973392.1	+	7279	7994	MSTRG.12780.2	2	348	MSTRG.12780
u	novel	0.0109612	-0.139674	NW_004973392.1	+	7279	7994	MSTRG.12780.3	2	250	MSTRG.12780
u	novel	0.058372	-0.0188416	NW_004973392.1	+	7279	7994	MSTRG.12780.4	3	541	MSTRG.12780
u	novel	0.00498654	-0.16343	NW_004973392.1	+	7279	7994	MSTRG.12780.5	3	267	MSTRG.12780
x	novel	0.0879955	-0.11223	NW_004973392.1	-	3265	3934	MSTRG.12782.1	2	280	MSTRG.12782
x	novel	0.0894156	-0.11264	NW_004973392.1	-	3265	3933	MSTRG.12782.2	2	321	MSTRG.12782
x	novel	0.159621	-0.0966656	NW_004973392.1	-	3265	3934	MSTRG.12782.3	3	478	MSTRG.12782
u	novel	0.0792529	-0.0589824	NW_004973393.1	+	125659	128026	MSTRG.12791.1	1	2368	MSTRG.12791
u	novel	0.066521	-0.0155648	NW_004973393.1	.	1067049	1067532	MSTRG.12799.1	1	484	MSTRG.12799
u	novel	0.0064243	-0.034816	NW_004973393.1	.	1264340	1265074	MSTRG.12805.1	1	735	MSTRG.12805
u	novel	0.12803	-0.057344	NW_004973393.1	.	1378724	1379103	MSTRG.12807.1	1	380	MSTRG.12807
u	novel	0.00957247	-0.115507	NW_004973393.1	-	319187	319527	MSTRG.12809.1	1	341	MSTRG.12809
u	novel	0.0606286	-0.0118784	NW_004973192.1	+	6568527	6575886	MSTRG.1281.1	1	7360	MSTRG.1281
o	novel	0.262592	-0.0069632	NW_004973393.1	+	319187	324047	MSTRG.12810.1	2	267	MSTRG.12810
j	novel	0.127117	-0.110592	NW_004973393.1	-	413657	421600	MSTRG.12818.1	4	818	MSTRG.12818
i	novel	0.321974	-0.012288	NW_004973393.1	+	426242	426915	MSTRG.12821.1	1	674	MSTRG.12821
x	novel	0.0567002	-0.016384	NW_004973393.1	-	530427	531553	MSTRG.12824.1	1	1127	MSTRG.12824
u	novel	0.0421944	-0.107725	NW_004973393.1	.	2041346	2041692	MSTRG.12845.1	1	347	MSTRG.12845
u	novel	0.00532797	-0.0004096	NW_004973393.1	+	1963031	1963244	MSTRG.12846.1	1	214	MSTRG.12846
i	novel	0.0173146	-0.0004096	NW_004973393.1	.	2005645	2006219	MSTRG.12848.1	1	575	MSTRG.12848
u	novel	0.0140903	-0.258048	NW_004973192.1	.	6633028	6634112	MSTRG.1285.1	1	1085	MSTRG.1285
j	novel	0.0118428	-0.0004096	NW_004973393.1	+	2132923	2239305	MSTRG.12850.1	6	839	MSTRG.12850
j	novel	0.0283529	-0.118784	NW_004973393.1	+	2132928	2137188	MSTRG.12850.7	3	1163	MSTRG.12850
o	novel	0.0698022	-0.024576	NW_004973393.1	-	1426201	1901624	MSTRG.12853.1	2	12681	MSTRG.12853
o	novel	0.0366621	-0.077824	NW_004973393.1	+	1606381	1682878	MSTRG.12855.1	2	1186	MSTRG.12855
i	novel	0.121694	-0.0380928	NW_004973393.1	-	2488294	2496563	MSTRG.12866.1	1	8270	MSTRG.12866
o	novel	0.0580864	-0.0024576	NW_004973393.1	+	2564400	2645759	MSTRG.12871.1	2	2471	MSTRG.12871
o	novel	0.0742943	-0.057344	NW_004973393.1	+	2603629	2645784	MSTRG.12871.2	2	1812	MSTRG.12871
u	novel	0.137458	-0.159744	NW_004973192.1	.	6727509	6728063	MSTRG.1288.1	1	555	MSTRG.1288
u	novel	0.127649	-0.0086016	NW_004973393.1	+	3406804	3413255	MSTRG.12881.1	3	4575	MSTRG.12881
u	novel	0.0224422	-0.458752	NW_004973393.1	.	3488321	3488527	MSTRG.12886.1	1	207	MSTRG.12886
u	novel	0.030642	-0.024576	NW_004973393.1	-	2996478	2997297	MSTRG.12891.1	1	820	MSTRG.12891
i	novel	0.0426273	-0.10199	NW_004973393.1	+	4186460	4186795	MSTRG.12896.1	1	336	MSTRG.12896
j	novel	0.233726	-0.016384	NW_004973393.1	+	4233332	4235611	MSTRG.12900.2	2	2064	MSTRG.12900
u	novel	0.147654	-0.06144	NW_004973395.1	.	32969	36092	MSTRG.12906.1	1	3124	MSTRG.12906
u	novel	0.00504524	-0.0933888	NW_004973396.1	.	180473	180708	MSTRG.12909.1	1	236	MSTRG.12909
u	novel	0.0425714	-0.0176128	NW_004973396.1	.	338294	339117	MSTRG.12910.1	1	824	MSTRG.12910
u	novel	0.157825	-0.0434176	NW_004973396.1	.	497486	497851	MSTRG.12911.1	1	366	MSTRG.12911
u	novel	0.0443903	-0.077824	NW_004973396.1	.	513814	514087	MSTRG.12912.1	1	274	MSTRG.12912
u	novel	0.0183966	-0.0536576	NW_004973397.1	.	1	594	MSTRG.12916.1	1	594	MSTRG.12916
u	novel	0.0557317	-0.0217088	NW_004973397.1	.	41368	41789	MSTRG.12917.1	1	422	MSTRG.12917
j	novel	0.083199	-0.0012288	NW_004973397.1	-	85139	92742	MSTRG.12918.2	3	630	MSTRG.12918
j	novel	0.159595	-0.159744	NW_004973192.1	-	7129014	7363612	MSTRG.1292.2	10	1167	MSTRG.1292
j	novel	0.0102556	-0.028672	NW_004973192.1	-	7279360	7363612	MSTRG.1292.3	3	749	MSTRG.1292
j	novel	0.0590876	-0.0724992	NW_004973192.1	-	7316553	7364427	MSTRG.1292.4	4	2757	MSTRG.1292
o	novel	0.0940961	-0.012288	NW_004973192.1	-	7316931	7319798	MSTRG.1292.5	2	2089	MSTRG.1292
u	novel	0.335893	-0.0475136	NW_004973397.1	+	820549	824237	MSTRG.12920.1	1	3689	MSTRG.12920
u	novel	0.283492	-0.0217088	NW_004973397.1	+	120914	121268	MSTRG.12921.1	1	355	MSTRG.12921
j	novel	0.0224633	-0.077824	NW_004973397.1	-	407854	416891	MSTRG.12925.4	3	1473	MSTRG.12925
u	novel	0.138867	-0.008192	NW_004973397.1	.	490989	491301	MSTRG.12927.1	1	313	MSTRG.12927
u	novel	0.0275834	-0.028672	NW_004973397.1	-	726154	744482	MSTRG.12933.1	2	1845	MSTRG.12933
u	novel	0.0427671	-0.0004096	NW_004973397.1	+	926192	926610	MSTRG.12940.1	1	419	MSTRG.12940
u	novel	0.176345	-0.0720896	NW_004973397.1	-	1027775	1048888	MSTRG.12943.1	3	879	MSTRG.12943
u	novel	0.216158	-0.008192	NW_004973397.1	-	1036004	1036627	MSTRG.12944.1	1	624	MSTRG.12944
o	novel	0.151241	-0.0364544	NW_004973397.1	+	1114630	1132562	MSTRG.12949.1	3	1947	MSTRG.12949
o	novel	0.151241	-0.0077824	NW_004973397.1	+	1114634	1132555	MSTRG.12949.3	2	1937	MSTRG.12949
o	novel	0.117476	-0.004096	NW_004973397.1	-	1183144	1206489	MSTRG.12956.1	2	2940	MSTRG.12956
j	novel	0.0564059	-0.0167936	NW_004973397.1	-	1205100	1263464	MSTRG.12956.2	4	1631	MSTRG.12956
o	novel	0.0432652	-0.004096	NW_004973397.1	-	1206783	1254602	MSTRG.12956.4	2	1540	MSTRG.12956
u	novel	0.10595	-0.004096	NW_004973192.1	-	7654280	7658685	MSTRG.1296.2	3	3258	MSTRG.1296
u	novel	0.0442757	-0.0135168	NW_004973397.1	-	1365214	1397627	MSTRG.12965.1	2	1030	MSTRG.12965
u	novel	0.0227553	-0.008192	NW_004973397.1	+	1515500	1527331	MSTRG.12967.1	2	368	MSTRG.12967
u	novel	0.00279559	-0.262144	NW_004973397.1	-	2232537	2232785	MSTRG.12969.1	1	249	MSTRG.12969
u	novel	0.059263	-0.0004096	NW_004973397.1	.	2270833	2271036	MSTRG.12970.1	1	204	MSTRG.12970
x	novel	1.88234e-05	-0.0004096	NW_004973397.1	+	1787816	1789090	MSTRG.12976.1	2	276	MSTRG.12976
x	novel	0.0339137	-0.0004096	NW_004973397.1	+	1788241	1788731	MSTRG.12977.1	3	349	MSTRG.12977
x	novel	0.0649177	-0.0745472	NW_004973397.1	+	1801537	1807411	MSTRG.12978.1	2	2084	MSTRG.12978
j	novel	0.0212221	-0.026624	NW_004973192.1	+	7477157	7481424	MSTRG.1298.2	2	1102	MSTRG.1298
i	novel	0.120233	-0.08192	NW_004973397.1	+	1862625	1864740	MSTRG.12981.1	1	2116	MSTRG.12981
x	novel	0.0761642	-0.0258048	NW_004973397.1	-	1873904	1937237	MSTRG.12983.1	2	3302	MSTRG.12983
x	novel	0.0632411	-0.0270336	NW_004973397.1	-	1891081	1930971	MSTRG.12984.1	2	278	MSTRG.12984
u	novel	0.176773	-0.0458752	NW_004973397.1	-	1938271	1954204	MSTRG.12985.1	2	3899	MSTRG.12985
u	novel	0.0829787	-0.073728	NW_004973397.1	-	1942288	1949471	MSTRG.12986.1	2	1649	MSTRG.12986
i	novel	0.0272404	-0.065536	NW_004973397.1	-	2049880	2052101	MSTRG.12987.1	2	2158	MSTRG.12987
i	novel	0.0729367	-0.024576	NW_004973397.1	-	2077433	2080377	MSTRG.12988.1	2	2881	MSTRG.12988
x	novel	0.131526	-0.03072	NW_004973397.1	-	2096798	2116427	MSTRG.12989.1	2	1933	MSTRG.12989
i	novel	1.51864e-05	-0.114688	NW_004973398.1	-	2023	2462	MSTRG.12997.1	2	349	MSTRG.12997
x	novel	0.0198499	-0.0704512	NW_004973398.1	-	7236	9551	MSTRG.12998.1	3	240	MSTRG.12998
i	novel	0.332753	-0.0688128	NW_004973398.1	.	79273	79733	MSTRG.13003.1	1	461	MSTRG.13003
j	novel	0.152421	-0.0434176	NW_004973398.1	+	324950	338128	MSTRG.13007.3	6	2479	MSTRG.13007
i	novel	0.00563056	-0.057344	NW_004973398.1	+	292041	292362	MSTRG.13011.1	1	322	MSTRG.13011
x	novel	0.011785	-0.148275	NW_004973398.1	-	593153	595127	MSTRG.13023.1	2	207	MSTRG.13023
x	novel	0.425712	-0.0335872	NW_004973398.1	+	639123	641478	MSTRG.13026.1	2	2289	MSTRG.13026
x	novel	0.0166016	-0.0540672	NW_004973398.1	+	640460	641478	MSTRG.13026.2	2	949	MSTRG.13026
x	novel	0.0198293	-0.0540672	NW_004973398.1	+	640486	641478	MSTRG.13026.3	2	924	MSTRG.13026
x	novel	0.0163629	-0.0540672	NW_004973398.1	+	640493	641478	MSTRG.13026.4	3	886	MSTRG.13026
x	novel	0.0204853	-0.0540672	NW_004973398.1	+	640493	641478	MSTRG.13026.5	3	885	MSTRG.13026
u	novel	0.116613	-0.0004096	NW_004973398.1	+	654433	664229	MSTRG.13028.1	2	9726	MSTRG.13028
u	novel	0.102158	-0.06144	NW_004973399.1	.	1	785	MSTRG.13030.1	1	785	MSTRG.13030
u	novel	0.0185004	-0.12288	NW_004973399.1	+	157249	158469	MSTRG.13046.1	2	239	MSTRG.13046
j	novel	0.0296995	-0.0159744	NW_004973399.1	+	166779	168554	MSTRG.13052.1	3	430	MSTRG.13052
u	novel	0.0217984	-0.0868352	NW_004973399.1	-	754926	755146	MSTRG.13057.1	1	221	MSTRG.13057
u	novel	0.0490068	-0.008192	NW_004973399.1	+	1311621	1324342	MSTRG.13063.1	3	2227	MSTRG.13063
u	novel	0.0355549	-0.0004096	NW_004973399.1	.	575719	578276	MSTRG.13092.1	1	2558	MSTRG.13092
u	novel	0.112496	-0.0282624	NW_004973399.1	.	579401	583520	MSTRG.13093.1	1	4120	MSTRG.13093
j	novel	0.244288	-0.0495616	NW_004973399.1	+	1694230	1712812	MSTRG.13098.1	4	12546	MSTRG.13098
u	novel	0.00424847	-0.0475136	NW_004973178.1	+	755320	755877	MSTRG.131.1	1	558	MSTRG.131
j	novel	0.407767	-0.016384	NW_004973399.1	-	1746179	1874290	MSTRG.13100.1	4	2260	MSTRG.13100
j	novel	0.166154	-0.0053248	NW_004973399.1	-	1818472	1874290	MSTRG.13100.3	3	1229	MSTRG.13100
u	novel	0.0751617	-0.0098304	NW_004973399.1	.	2085200	2086253	MSTRG.13101.1	1	1054	MSTRG.13101
i	novel	0.094505	-0.0196608	NW_004973399.1	+	3707672	3711482	MSTRG.13119.1	1	3811	MSTRG.13119
j	novel	0.0337541	-0.04096	NW_004973192.1	-	8140995	8170102	MSTRG.1312.1	3	1530	MSTRG.1312
i	novel	0.0158747	-0.036864	NW_004973399.1	+	3729009	3729927	MSTRG.13120.1	2	864	MSTRG.13120
i	novel	0.147037	-0.0290816	NW_004973399.1	+	3734675	3737734	MSTRG.13121.1	1	3060	MSTRG.13121
u	novel	0.0289664	-0.0004096	NW_004973399.1	.	4004410	4004646	MSTRG.13124.1	1	237	MSTRG.13124
u	novel	0.175102	-0.0151552	NW_004973399.1	-	4107042	4108108	MSTRG.13127.1	2	679	MSTRG.13127
i	novel	0.0156181	-0.0004096	NW_004973399.1	-	4330512	4333127	MSTRG.13130.1	2	2571	MSTRG.13130
x	novel	0.0468763	-0.0155648	NW_004973399.1	+	4356652	4364141	MSTRG.13132.1	2	7432	MSTRG.13132
x	novel	0.0407366	-0.0155648	NW_004973399.1	+	4356701	4364141	MSTRG.13132.2	2	7366	MSTRG.13132
j	novel	0.0278187	-0.012288	NW_004973399.1	-	4356701	4365923	MSTRG.13133.1	3	7985	MSTRG.13133
o	novel	0.113616	-0.0397312	NW_004973399.1	+	4392645	4400858	MSTRG.13135.8	2	8028	MSTRG.13135
i	novel	0.012068	-0.04096	NW_004973399.1	+	4400921	4404214	MSTRG.13136.1	1	3294	MSTRG.13136
j	novel	0.170346	-0.094208	NW_004973399.1	-	4533188	4539070	MSTRG.13144.1	4	967	MSTRG.13144
i	novel	0.0572994	-0.0372736	NW_004973399.1	+	4745921	4755489	MSTRG.13151.1	1	9569	MSTRG.13151
u	novel	0.112424	-0.053248	NW_004973399.1	.	4873778	4879776	MSTRG.13152.1	1	5999	MSTRG.13152
u	novel	0.1322	-0.0147456	NW_004973399.1	.	4884143	4899233	MSTRG.13153.1	1	15091	MSTRG.13153
i	novel	0.0630693	-0.0004096	NW_004973403.1	.	88962	89309	MSTRG.13162.1	1	348	MSTRG.13162
i	novel	0.285634	-0.100762	NW_004973403.1	.	98012	98829	MSTRG.13163.1	1	818	MSTRG.13163
x	novel	0.465715	-0.0004096	NW_004973403.1	-	651309	656497	MSTRG.13171.1	3	2688	MSTRG.13171
u	novel	0.0427319	-0.0004096	NW_004973403.1	+	728093	728738	MSTRG.13173.1	1	646	MSTRG.13173
j	novel	0.0868997	-0.0417792	NW_004973402.1	+	101374	106356	MSTRG.13178.2	2	4166	MSTRG.13178
o	novel	0.0225535	-0.200704	NW_004973402.1	+	121947	148792	MSTRG.13179.1	2	1469	MSTRG.13179
i	novel	0.0541269	-0.0004096	NW_004973402.1	-	139586	151472	MSTRG.13182.1	2	2642	MSTRG.13182
x	novel	0.0165462	-0.0004096	NW_004973402.1	-	453683	476183	MSTRG.13194.1	2	641	MSTRG.13194
o	novel	0.0413032	-0.0090112	NW_004973402.1	+	454038	792260	MSTRG.13195.1	2	274	MSTRG.13195
x	novel	0.0380884	-0.0372736	NW_004973402.1	-	714832	746676	MSTRG.13197.1	7	4699	MSTRG.13197
x	novel	0.0390291	-0.0335872	NW_004973402.1	-	742621	745096	MSTRG.13199.1	4	342	MSTRG.13199
i	novel	0.0711329	-0.032768	NW_004973403.1	.	2223060	2224050	MSTRG.13224.1	1	991	MSTRG.13224
i	novel	0.0217004	-0.0782336	NW_004973403.1	.	2224318	2226307	MSTRG.13225.1	1	1990	MSTRG.13225
x	novel	0.0405968	-0.098304	NW_004973403.1	+	2299984	2331166	MSTRG.13227.1	2	223	MSTRG.13227
x	novel	0.089661	-0.03072	NW_004973403.1	+	2319648	2331166	MSTRG.13227.2	3	405	MSTRG.13227
x	novel	0.318937	-0.08192	NW_004973403.1	+	2320854	2344934	MSTRG.13227.3	3	509	MSTRG.13227
x	novel	0.245518	-0.03072	NW_004973403.1	+	2323148	2345409	MSTRG.13227.4	3	769	MSTRG.13227
u	novel	0.0549293	-0.0413696	NW_004973403.1	+	2325440	2345409	MSTRG.13227.5	3	1060	MSTRG.13227
u	novel	0.101096	-0.032768	NW_004973403.1	+	2325440	2331166	MSTRG.13227.6	3	774	MSTRG.13227
u	novel	0.160258	-0.0229376	NW_004973403.1	+	2325440	2345409	MSTRG.13227.7	3	1021	MSTRG.13227
u	novel	0.050734	-0.004096	NW_004973403.1	+	2330226	2331166	MSTRG.13227.8	2	809	MSTRG.13227
j	novel	0.37172	-0.0729088	NW_004973403.1	-	2321468	2323608	MSTRG.13228.4	4	1680	MSTRG.13228
u	novel	0.141349	-0.0004096	NW_004973403.1	+	2326506	2326802	MSTRG.13229.1	1	297	MSTRG.13229
j	novel	0.271634	-0.08192	NW_004973403.1	+	2367613	2417285	MSTRG.13231.1	4	3891	MSTRG.13231
j	novel	0.0101732	-0.103219	NW_004973403.1	+	2378410	2414373	MSTRG.13231.2	2	697	MSTRG.13231
j	novel	0.0581083	-0.032768	NW_004973403.1	+	2521671	2618340	MSTRG.13232.7	2	7021	MSTRG.13232
i	novel	0.046855	-0.0565248	NW_004973403.1	-	2442601	2443220	MSTRG.13234.1	1	620	MSTRG.13234
o	novel	0.102	-0.0319488	NW_004973403.1	-	2443472	2444914	MSTRG.13235.1	2	1176	MSTRG.13235
u	novel	0.0474218	-0.110182	NW_004973404.1	.	1	1044	MSTRG.13237.1	1	1044	MSTRG.13237
j	novel	0.0567156	-0.006144	NW_004973404.1	-	904945	942186	MSTRG.13252.1	5	5649	MSTRG.13252
j	novel	0.0623729	-0.006144	NW_004973404.1	-	905892	942186	MSTRG.13252.3	4	4352	MSTRG.13252
j	novel	0.0934624	-0.098304	NW_004973404.1	-	908723	942186	MSTRG.13252.4	4	1527	MSTRG.13252
j	novel	0.0214436	-0.090112	NW_004973404.1	-	1194357	1231820	MSTRG.13255.1	3	2443	MSTRG.13255
u	novel	0.0382701	-0.0913408	NW_004973404.1	.	1288085	1288520	MSTRG.13257.1	1	436	MSTRG.13257
o	novel	0.210668	-0.043008	NW_004973404.1	+	1361223	1371266	MSTRG.13259.4	2	9498	MSTRG.13259
x	novel	0.121155	-0.0004096	NW_004973404.1	+	1911411	1933953	MSTRG.13275.1	4	1813	MSTRG.13275
u	novel	0.0208493	-0.323584	NW_004973404.1	+	1914796	1933331	MSTRG.13275.2	4	1147	MSTRG.13275
u	novel	0.0150759	-0.022528	NW_004973404.1	+	1914820	1928895	MSTRG.13275.3	3	465	MSTRG.13275
x	novel	0.0644203	-0.008192	NW_004973404.1	+	1914820	2135922	MSTRG.13275.4	4	643	MSTRG.13275
x	novel	0.169046	-0.008192	NW_004973404.1	+	1914847	2135922	MSTRG.13275.6	5	678	MSTRG.13275
u	novel	0.164148	-0.0004096	NW_004973404.1	.	2311136	2311779	MSTRG.13278.1	1	644	MSTRG.13278
j	novel	0.164652	-0.0671744	NW_004973404.1	-	3076676	3081840	MSTRG.13295.3	2	3192	MSTRG.13295
u	novel	0.151091	-0.0782336	NW_004973404.1	.	3184441	3188540	MSTRG.13299.1	1	4100	MSTRG.13299
u	novel	0.321292	-0.0479232	NW_004973404.1	-	3318107	3319136	MSTRG.13312.1	1	1030	MSTRG.13312
x	novel	0.0379204	-0.0159744	NW_004973404.1	+	3355572	3355868	MSTRG.13317.1	2	273	MSTRG.13317
j	novel	0.190915	-0.008192	NW_004973404.1	-	3654965	3667856	MSTRG.13331.2	4	4463	MSTRG.13331
j	novel	0.194227	-0.008192	NW_004973404.1	-	3659122	3667851	MSTRG.13331.5	4	2845	MSTRG.13331
i	novel	0.0237684	-0.0217088	NW_004973404.1	.	3806644	3808320	MSTRG.13334.1	1	1677	MSTRG.13334
j	novel	0.395089	-0.0544768	NW_004973404.1	+	3860006	3863617	MSTRG.13338.1	4	452	MSTRG.13338
u	novel	0.0212297	-0.18432	NW_004973405.1	.	340793	341115	MSTRG.13343.1	1	323	MSTRG.13343
j	novel	0.204236	-0.0217088	NW_004973405.1	-	328707	339779	MSTRG.13344.3	2	869	MSTRG.13344
u	novel	0.00680765	-0.0159744	NW_004973405.1	.	691285	691798	MSTRG.13349.1	1	514	MSTRG.13349
u	novel	0.01024	-0.598016	NW_004973405.1	.	776221	776442	MSTRG.13354.1	1	222	MSTRG.13354
u	novel	0.128768	-0.026624	NW_004973405.1	+	1116741	1123592	MSTRG.13356.1	2	1713	MSTRG.13356
u	novel	0.0208253	-0.0004096	NW_004973405.1	.	1127025	1127409	MSTRG.13359.1	1	385	MSTRG.13359
u	novel	0.0338331	-0.0712704	NW_004973405.1	.	1256454	1256892	MSTRG.13360.1	1	439	MSTRG.13360
u	novel	0.302777	-0.113869	NW_004973405.1	.	1510881	1511454	MSTRG.13361.1	1	574	MSTRG.13361
u	novel	0.0139975	-0.0004096	NW_004973405.1	.	2177094	2177604	MSTRG.13369.1	1	511	MSTRG.13369
i	novel	0.0462802	-0.045056	NW_004973405.1	.	2200644	2205292	MSTRG.13372.1	1	4649	MSTRG.13372
i	novel	0.225585	-0.0884736	NW_004973405.1	.	2235369	2245959	MSTRG.13373.1	1	10591	MSTRG.13373
i	novel	0.0808675	-0.0684032	NW_004973405.1	.	2259033	2259812	MSTRG.13374.1	1	780	MSTRG.13374
i	novel	0.170508	-0.0864256	NW_004973405.1	.	2260638	2262641	MSTRG.13375.1	1	2004	MSTRG.13375
i	novel	0.115012	-0.0077824	NW_004973405.1	-	2284806	2287895	MSTRG.13377.1	1	3090	MSTRG.13377
u	novel	0.0548334	-0.018432	NW_004973408.1	-	13322	15905	MSTRG.13379.1	1	2584	MSTRG.13379
u	novel	0.00595363	-0.090112	NW_004973408.1	-	149847	151506	MSTRG.13381.1	2	775	MSTRG.13381
u	novel	0.455014	-0.045056	NW_004973409.1	.	2857	3873	MSTRG.13383.1	1	1017	MSTRG.13383
j	novel	0.0208611	-0.0004096	NW_004973409.1	-	179054	217898	MSTRG.13385.14	3	384	MSTRG.13385
j	novel	0.280117	-0.008192	NW_004973409.1	-	206923	217881	MSTRG.13385.15	3	1551	MSTRG.13385
i	novel	0.00849232	-0.004096	NW_004973409.1	.	122215	122490	MSTRG.13386.1	1	276	MSTRG.13386
u	novel	0.0129733	-0.0364544	NW_004973409.1	.	610685	610896	MSTRG.13392.1	1	212	MSTRG.13392
j	novel	0.0471885	-0.004096	NW_004973409.1	-	534771	581801	MSTRG.13393.1	3	1607	MSTRG.13393
j	novel	0.16336	-0.065536	NW_004973409.1	-	535565	581832	MSTRG.13393.2	5	893	MSTRG.13393
j	novel	0.0325358	-0.045056	NW_004973409.1	-	535567	581553	MSTRG.13393.3	3	725	MSTRG.13393
j	novel	0.0993637	-0.008192	NW_004973409.1	-	535567	581831	MSTRG.13393.4	4	847	MSTRG.13393
j	novel	0.0913572	-0.024576	NW_004973409.1	-	535568	582118	MSTRG.13393.5	5	1278	MSTRG.13393
j	novel	0.107109	-0.012288	NW_004973409.1	-	535572	582163	MSTRG.13393.6	5	1368	MSTRG.13393
u	novel	0.0124482	-0.0212992	NW_004973409.1	.	1397752	1398243	MSTRG.13404.1	1	492	MSTRG.13404
x	novel	0.0144141	-0.0253952	NW_004973409.1	+	1253314	1270746	MSTRG.13412.1	3	379	MSTRG.13412
i	novel	0.0153824	-0.0352256	NW_004973410.1	.	124198	124485	MSTRG.13417.1	1	288	MSTRG.13417
i	novel	0.0510495	-0.0692224	NW_004973410.1	+	137403	141800	MSTRG.13418.1	1	4398	MSTRG.13418
o	novel	0.0435201	-0.002048	NW_004973410.1	-	242543	657186	MSTRG.13420.1	2	669	MSTRG.13420
u	novel	0.00854853	-0.0180224	NW_004973410.1	.	1246030	1246578	MSTRG.13426.1	1	549	MSTRG.13426
u	novel	0.241289	-0.0053248	NW_004973410.1	.	1336951	1337441	MSTRG.13428.1	1	491	MSTRG.13428
j	novel	0.17663	-0.03072	NW_004973192.1	+	9556228	9564574	MSTRG.1343.2	2	2157	MSTRG.1343
u	novel	0.0411265	-0.0815104	NW_004973410.1	.	1458003	1458301	MSTRG.13431.1	1	299	MSTRG.13431
u	novel	0.0142197	-0.057344	NW_004973411.1	.	13538	13990	MSTRG.13433.1	1	453	MSTRG.13433
u	novel	0.215648	-0.0098304	NW_004973411.1	-	47319	49092	MSTRG.13435.1	1	1774	MSTRG.13435
u	novel	0.175049	-0.0352256	NW_004973411.1	.	50321	55279	MSTRG.13437.1	1	4959	MSTRG.13437
u	novel	0.0642028	-0.06144	NW_004973411.1	+	72269	144807	MSTRG.13438.1	2	3780	MSTRG.13438
u	novel	0.0880535	-0.114688	NW_004973411.1	+	72318	144803	MSTRG.13438.2	3	3647	MSTRG.13438
o	novel	0.411721	-0.0217088	NW_004973192.1	+	9584271	9609795	MSTRG.1344.2	5	1455	MSTRG.1344
o	novel	0.465612	-0.0073728	NW_004973192.1	+	9584271	9609795	MSTRG.1344.4	4	1106	MSTRG.1344
u	novel	0.114486	-0.270336	NW_004973411.1	-	291956	293472	MSTRG.13442.1	1	1517	MSTRG.13442
u	novel	0.0564538	-0.053248	NW_004973411.1	.	474984	475362	MSTRG.13445.1	1	379	MSTRG.13445
i	novel	0.310533	-0.008192	NW_004973411.1	.	540752	541194	MSTRG.13449.1	1	443	MSTRG.13449
j	novel	0.0857249	-0.0417792	NW_004973411.1	+	597644	617780	MSTRG.13451.1	7	2577	MSTRG.13451
j	novel	0.12206	-0.0417792	NW_004973411.1	+	597644	617780	MSTRG.13451.2	6	2506	MSTRG.13451
i	novel	0.0148784	-0.0212992	NW_004973411.1	.	680963	681399	MSTRG.13453.1	1	437	MSTRG.13453
i	novel	0.121756	-0.0999424	NW_004973411.1	-	699491	708996	MSTRG.13454.1	1	9506	MSTRG.13454
x	novel	0.131242	-0.0503808	NW_004973411.1	-	810136	811104	MSTRG.13456.1	2	386	MSTRG.13456
x	novel	0.0150758	-0.077824	NW_004973411.1	+	848739	851307	MSTRG.13460.1	2	2491	MSTRG.13460
i	novel	0.0695629	-0.090112	NW_004973411.1	+	863558	867519	MSTRG.13461.1	2	3906	MSTRG.13461
u	novel	0.0817598	-0.151552	NW_004973411.1	.	2246414	2247519	MSTRG.13476.1	1	1106	MSTRG.13476
j	novel	0.0556887	-0.032768	NW_004973411.1	+	1866926	1878257	MSTRG.13478.1	3	4578	MSTRG.13478
i	novel	0.145003	-0.0233472	NW_004973411.1	+	2052760	2055528	MSTRG.13479.1	2	2660	MSTRG.13479
u	novel	0.0277758	-0.101171	NW_004973413.1	.	161284	161865	MSTRG.13484.1	1	582	MSTRG.13484
u	novel	0.233042	-0.0208896	NW_004973413.1	.	442174	443160	MSTRG.13490.1	1	987	MSTRG.13490
u	novel	0.0541789	-0.1024	NW_004973413.1	+	444239	444590	MSTRG.13491.1	1	352	MSTRG.13491
j	novel	0.103144	-0.0221184	NW_004973413.1	+	465791	526424	MSTRG.13492.2	3	3173	MSTRG.13492
j	novel	0.0223596	-0.02048	NW_004973413.1	-	823403	827661	MSTRG.13499.1	2	1599	MSTRG.13499
u	novel	0.0120222	-0.0380928	NW_004973413.1	+	839560	839774	MSTRG.13501.1	1	215	MSTRG.13501
i	novel	0.0364903	-0.0700416	NW_004973413.1	.	1348450	1348770	MSTRG.13505.1	1	321	MSTRG.13505
u	novel	0.193767	-0.0618496	NW_004973413.1	.	1957661	1958355	MSTRG.13513.1	1	695	MSTRG.13513
j	novel	0.0257389	-0.0192512	NW_004973413.1	+	1993777	2030067	MSTRG.13514.1	6	4319	MSTRG.13514
j	novel	0.0274345	-0.0466944	NW_004973413.1	+	2003532	2030063	MSTRG.13514.10	6	5530	MSTRG.13514
j	novel	0.0246336	-0.0421888	NW_004973413.1	+	1994142	2030053	MSTRG.13514.3	6	3981	MSTRG.13514
j	novel	0.0257389	-0.0004096	NW_004973413.1	+	2003519	2030067	MSTRG.13514.7	6	4003	MSTRG.13514
j	novel	0.0346798	-0.0466944	NW_004973413.1	+	2003527	2030067	MSTRG.13514.8	5	8243	MSTRG.13514
j	novel	0.139842	-0.0466944	NW_004973413.1	+	2003527	2030067	MSTRG.13514.9	6	5301	MSTRG.13514
u	novel	0.042416	-0.0294912	NW_004973413.1	.	2039389	2041681	MSTRG.13515.1	1	2293	MSTRG.13515
j	novel	0.036764	-0.0090112	NW_004973413.1	-	3571189	3584326	MSTRG.13538.1	2	2416	MSTRG.13538
j	novel	0.0776633	-0.0172032	NW_004973413.1	-	3572740	3584657	MSTRG.13538.2	3	3973	MSTRG.13538
u	novel	0.00284875	-0.0004096	NW_004973413.1	.	4017011	4017259	MSTRG.13539.1	1	249	MSTRG.13539
i	novel	0.0811899	-0.0004096	NW_004973413.1	.	4202768	4203014	MSTRG.13545.1	1	247	MSTRG.13545
u	novel	0.104658	-0.0303104	NW_004973413.1	+	4451299	4532250	MSTRG.13552.1	2	77307	MSTRG.13552
i	novel	0.0739825	-0.0868352	NW_004973413.1	-	4676671	4677120	MSTRG.13554.1	1	450	MSTRG.13554
u	novel	0.41053	-0.043008	NW_004973413.1	+	5092945	5140862	MSTRG.13558.1	2	19692	MSTRG.13558
u	novel	0.0400462	-0.016384	NW_004973413.1	+	5135433	5140783	MSTRG.13558.2	2	5142	MSTRG.13558
u	novel	0.0792072	-0.03072	NW_004973413.1	.	5301518	5301741	MSTRG.13561.1	1	224	MSTRG.13561
u	novel	0.0429093	-0.0233472	NW_004973413.1	.	5412146	5416437	MSTRG.13564.1	1	4292	MSTRG.13564
j	novel	0.149354	-0.0004096	NW_004973413.1	-	5435795	5444035	MSTRG.13566.1	3	3498	MSTRG.13566
o	novel	0.263664	-0.0028672	NW_004973413.1	-	5435796	5444035	MSTRG.13566.2	2	6147	MSTRG.13566
j	novel	0.150374	-0.0004096	NW_004973413.1	-	5435801	5446179	MSTRG.13566.3	3	4697	MSTRG.13566
i	novel	0.0408486	-0.0159744	NW_004973413.1	-	5951024	5952160	MSTRG.13571.1	1	1137	MSTRG.13571
j	novel	0.255259	-0.0524288	NW_004973413.1	-	5684940	5695967	MSTRG.13573.2	8	699	MSTRG.13573
i	novel	0.0105928	-0.0086016	NW_004973413.1	.	5720144	5720451	MSTRG.13574.1	1	308	MSTRG.13574
j	novel	0.0774428	-0.192512	NW_004973413.1	-	6301070	6310459	MSTRG.13576.2	4	465	MSTRG.13576
i	novel	0.0154311	-0.04096	NW_004973413.1	.	6427625	6429999	MSTRG.13580.1	1	2375	MSTRG.13580
u	novel	0.166426	-0.0024576	NW_004973413.1	+	7020960	7021516	MSTRG.13582.1	1	557	MSTRG.13582
u	novel	0.109573	-0.0811008	NW_004973413.1	.	7323840	7324425	MSTRG.13583.1	1	586	MSTRG.13583
u	novel	0.090052	-0.0643072	NW_004973413.1	.	7421349	7421867	MSTRG.13584.1	1	519	MSTRG.13584
u	novel	0.0428813	-0.0352256	NW_004973413.1	.	8550141	8557556	MSTRG.13587.1	1	7416	MSTRG.13587
u	novel	0.0529947	-0.0237568	NW_004973413.1	.	8558225	8561920	MSTRG.13588.1	1	3696	MSTRG.13588
u	novel	0.0469994	-0.028672	NW_004973413.1	+	8578256	8582977	MSTRG.13591.1	1	4722	MSTRG.13591
j	novel	0.0549809	-0.036864	NW_004973413.1	+	8008020	8020965	MSTRG.13593.2	3	3097	MSTRG.13593
i	novel	0.0290512	-0.07168	NW_004973413.1	.	8233742	8234282	MSTRG.13595.1	1	541	MSTRG.13595
j	novel	0.363803	-0.1024	NW_004973413.1	-	9618634	9627052	MSTRG.13599.2	3	1282	MSTRG.13599
u	novel	0.0241984	-0.119603	NW_004973178.1	.	733158	733410	MSTRG.136.1	1	253	MSTRG.136
i	novel	0.00386651	-0.0004096	NW_004973413.1	+	9825515	9825976	MSTRG.13607.1	1	462	MSTRG.13607
x	novel	0.015673	-0.0651264	NW_004973192.1	+	10083802	10085216	MSTRG.1361.1	1	1415	MSTRG.1361
i	novel	0.00463184	-0.0413696	NW_004973413.1	.	10558140	10558423	MSTRG.13614.1	1	284	MSTRG.13614
u	novel	0.0441001	-0.0323584	NW_004973413.1	+	10718968	10727188	MSTRG.13615.1	2	266	MSTRG.13615
u	novel	0.00472078	-0.090112	NW_004973413.1	-	11855827	11856116	MSTRG.13619.1	1	290	MSTRG.13619
j	novel	0.0624854	-0.3072	NW_004973413.1	-	11703306	11711136	MSTRG.13620.2	3	907	MSTRG.13620
u	novel	0.0843941	-0.0004096	NW_004973413.1	.	12011228	12011449	MSTRG.13622.1	1	222	MSTRG.13622
u	novel	0.0911632	-0.0815104	NW_004973413.1	-	12183149	12183593	MSTRG.13623.1	1	445	MSTRG.13623
u	novel	0.0172509	-0.012288	NW_004973413.1	.	12330286	12330582	MSTRG.13624.1	1	297	MSTRG.13624
u	novel	0.010146	-0.0495616	NW_004973413.1	-	11507136	11507501	MSTRG.13640.1	1	366	MSTRG.13640
u	novel	0.0228365	-0.004096	NW_004973413.1	-	13480899	13516034	MSTRG.13646.1	2	492	MSTRG.13646
j	novel	0.0243605	-0.045056	NW_004973413.1	+	12666367	12696192	MSTRG.13648.2	3	5122	MSTRG.13648
i	novel	0.108252	-0.0741376	NW_004973413.1	.	13066108	13066440	MSTRG.13651.1	1	333	MSTRG.13651
i	novel	0.0269352	-0.008192	NW_004973413.1	.	13305647	13306247	MSTRG.13652.1	1	601	MSTRG.13652
u	novel	0.160971	-0.161792	NW_004973413.1	.	13703819	13704058	MSTRG.13654.1	1	240	MSTRG.13654
u	novel	0.0998818	-0.0139264	NW_004973413.1	-	13729141	13815728	MSTRG.13655.1	2	700	MSTRG.13655
u	novel	0.0877701	-0.06144	NW_004973413.1	-	13780110	13815728	MSTRG.13655.2	2	599	MSTRG.13655
u	novel	0.0141673	-0.0004096	NW_004973413.1	-	13814190	13821737	MSTRG.13655.4	2	1112	MSTRG.13655
i	novel	0.115937	-0.032768	NW_004973413.1	.	14582194	14583060	MSTRG.13659.1	1	867	MSTRG.13659
j	novel	0.185411	-0.004096	NW_004973192.1	-	10119944	10165273	MSTRG.1366.5	2	513	MSTRG.1366
j	novel	0.110526	-0.0585728	NW_004973192.1	-	10178569	10190991	MSTRG.1366.6	2	5181	MSTRG.1366
i	novel	0.0221616	-0.0004096	NW_004973413.1	.	14808371	14808634	MSTRG.13660.1	1	264	MSTRG.13660
j	novel	0.230341	-0.024576	NW_004973413.1	-	14217703	14230987	MSTRG.13661.4	3	2426	MSTRG.13661
i	novel	0.051763	-0.02048	NW_004973413.1	.	15547638	15548132	MSTRG.13674.1	1	495	MSTRG.13674
j	novel	0.080525	-0.0126976	NW_004973413.1	-	15570829	15575278	MSTRG.13679.1	4	1218	MSTRG.13679
u	novel	0.0458229	-0.0241664	NW_004973413.1	.	15780222	15780452	MSTRG.13681.1	1	231	MSTRG.13681
i	novel	0.0625799	-0.0024576	NW_004973413.1	.	16272367	16272719	MSTRG.13683.1	1	353	MSTRG.13683
i	novel	0.0202317	-0.0004096	NW_004973413.1	.	16533938	16534345	MSTRG.13686.1	1	408	MSTRG.13686
i	novel	0.0716422	-0.106496	NW_004973413.1	.	16550911	16551451	MSTRG.13687.1	1	541	MSTRG.13687
i	novel	0.0357081	-0.0004096	NW_004973413.1	+	17152822	17153125	MSTRG.13690.1	2	253	MSTRG.13690
i	novel	0.121052	-0.012288	NW_004973413.1	.	17366336	17367734	MSTRG.13696.1	1	1399	MSTRG.13696
j	novel	0.083246	-0.049152	NW_004973192.1	-	10214931	10252430	MSTRG.1370.1	2	1402	MSTRG.1370
j	novel	0.0122993	-0.090112	NW_004973192.1	-	10230160	10252476	MSTRG.1370.5	3	401	MSTRG.1370
j	novel	0.0378794	-0.090112	NW_004973192.1	-	10239011	10252476	MSTRG.1370.9	3	490	MSTRG.1370
i	novel	0.10725	-0.0004096	NW_004973413.1	.	17698480	17698729	MSTRG.13701.1	1	250	MSTRG.13701
u	novel	0.0311242	-0.0405504	NW_004973413.1	.	17871865	17872101	MSTRG.13702.1	1	237	MSTRG.13702
u	novel	0.00693354	-0.155648	NW_004973413.1	.	17948399	17948648	MSTRG.13703.1	1	250	MSTRG.13703
j	novel	0.015454	-0.004096	NW_004973413.1	-	19394370	19409034	MSTRG.13714.21	5	498	MSTRG.13714
j	novel	0.0707912	-0.0598016	NW_004973413.1	-	19405159	19409034	MSTRG.13714.22	3	2699	MSTRG.13714
u	novel	0.00331567	-0.0004096	NW_004973413.1	.	20033857	20034074	MSTRG.13730.1	1	218	MSTRG.13730
o	novel	0.147263	-0.0004096	NW_004973413.1	+	20194175	20240519	MSTRG.13734.1	2	239	MSTRG.13734
u	novel	0.059458	-0.0053248	NW_004973413.1	.	20393763	20397576	MSTRG.13739.1	1	3814	MSTRG.13739
i	novel	0.0783743	-0.047104	NW_004973413.1	+	20507773	20512771	MSTRG.13741.1	1	4999	MSTRG.13741
u	novel	1.2272e-05	-0.0188416	NW_004973413.1	.	20775221	20775441	MSTRG.13744.1	1	221	MSTRG.13744
u	novel	0.123127	-0.0004096	NW_004973413.1	.	20902307	20902710	MSTRG.13748.1	1	404	MSTRG.13748
u	novel	0.061087	-0.0868352	NW_004973413.1	+	21712385	21712798	MSTRG.13759.1	1	414	MSTRG.13759
u	novel	0.0343918	-0.0421888	NW_004973413.1	.	22205192	22205442	MSTRG.13761.1	1	251	MSTRG.13761
u	novel	0.0272241	-0.06144	NW_004973413.1	+	22485904	22492182	MSTRG.13763.1	2	615	MSTRG.13763
u	novel	0.108619	-0.0987136	NW_004973413.1	.	22987129	22987356	MSTRG.13771.1	1	228	MSTRG.13771
u	novel	1.79162e-05	-0.028672	NW_004973413.1	.	23042820	23043028	MSTRG.13772.1	1	209	MSTRG.13772
i	novel	0.0276235	-0.26624	NW_004973413.1	.	23639309	23646390	MSTRG.13776.1	1	7082	MSTRG.13776
i	novel	0.0966209	-0.032768	NW_004973413.1	-	24060486	24069724	MSTRG.13778.1	2	4140	MSTRG.13778
u	novel	0.31397	-0.281805	NW_004973414.1	-	43350	43990	MSTRG.13797.1	1	641	MSTRG.13797
u	novel	0.19257	-0.0651264	NW_004973414.1	.	48578	48930	MSTRG.13798.1	1	353	MSTRG.13798
i	novel	0.11712	-0.0495616	NW_004973414.1	+	64215	64452	MSTRG.13801.1	1	238	MSTRG.13801
x	novel	0.0108743	-0.028672	NW_004973415.1	+	204792	263029	MSTRG.13805.1	4	1548	MSTRG.13805
x	novel	0.0212086	-0.0126976	NW_004973415.1	+	204800	258369	MSTRG.13805.2	4	802	MSTRG.13805
x	novel	0.014616	-0.016384	NW_004973415.1	+	303298	398473	MSTRG.13807.1	7	1104	MSTRG.13807
u	novel	0.0219903	-0.0004096	NW_004973417.1	.	88399	89747	MSTRG.13814.1	1	1349	MSTRG.13814
j	novel	0.178247	-0.014336	NW_004973417.1	+	157531	168122	MSTRG.13826.1	4	1255	MSTRG.13826
i	novel	0.0771074	-0.126976	NW_004973417.1	.	475293	475588	MSTRG.13835.1	1	296	MSTRG.13835
i	novel	0.0177642	-0.131072	NW_004973417.1	.	530338	530790	MSTRG.13836.1	1	453	MSTRG.13836
j	novel	0.0325167	-0.12288	NW_004973417.1	-	620908	639784	MSTRG.13838.3	3	779	MSTRG.13838
i	novel	0.0482468	-0.04096	NW_004973417.1	+	771819	772135	MSTRG.13841.1	1	317	MSTRG.13841
i	novel	0.020461	-0.34816	NW_004973417.1	.	797385	797696	MSTRG.13842.1	1	312	MSTRG.13842
i	novel	0.0363696	-0.075776	NW_004973417.1	.	861536	861801	MSTRG.13843.1	1	266	MSTRG.13843
j	novel	0.296605	-0.045056	NW_004973417.1	+	899567	919780	MSTRG.13846.4	2	2513	MSTRG.13846
i	novel	0.0771175	-0.04096	NW_004973417.1	+	935795	936097	MSTRG.13849.1	1	303	MSTRG.13849
i	novel	0.01136	-0.032768	NW_004973417.1	+	1073932	1080392	MSTRG.13856.1	2	624	MSTRG.13856
i	novel	0.00503972	-0.196608	NW_004973417.1	-	1183782	1184198	MSTRG.13860.1	1	417	MSTRG.13860
u	novel	0.0379454	-0.008192	NW_004973418.1	.	840534	846627	MSTRG.13869.1	1	6094	MSTRG.13869
u	novel	0.0295735	-0.0004096	NW_004973418.1	-	767037	773520	MSTRG.13872.1	2	6401	MSTRG.13872
u	novel	0.120625	-0.0356352	NW_004973418.1	+	774391	783294	MSTRG.13873.1	2	8827	MSTRG.13873
u	novel	0.0322888	-0.077824	NW_004973418.1	-	779695	783294	MSTRG.13874.1	1	3600	MSTRG.13874
j	novel	0.182251	-0.016384	NW_004973420.1	-	67651	76965	MSTRG.13882.2	3	7883	MSTRG.13882
i	novel	0.0770862	-0.004096	NW_004973420.1	.	113716	123758	MSTRG.13888.1	1	10043	MSTRG.13888
j	novel	0.21117	-0.0012288	NW_004973420.1	-	197394	203083	MSTRG.13892.1	3	1649	MSTRG.13892
j	novel	0.022918	-0.008192	NW_004973420.1	-	284104	301618	MSTRG.13900.24	4	2272	MSTRG.13900
u	novel	0.0221438	-0.018432	NW_004973420.1	.	390452	391440	MSTRG.13902.1	1	989	MSTRG.13902
u	novel	0.0744565	-0.012288	NW_004973420.1	-	392122	394919	MSTRG.13903.1	1	2798	MSTRG.13903
x	novel	0.111261	-0.014336	NW_004973420.1	+	404925	411996	MSTRG.13905.1	2	6983	MSTRG.13905
x	novel	0.136574	-0.014336	NW_004973420.1	+	408601	411984	MSTRG.13905.2	2	3295	MSTRG.13905
o	novel	0.298507	-0.0475136	NW_004973420.1	-	477351	480022	MSTRG.13906.6	2	2598	MSTRG.13906
i	novel	0.0627605	-0.190464	NW_004973420.1	+	453034	455806	MSTRG.13908.1	2	2683	MSTRG.13908
i	novel	0.281025	-0.0028672	NW_004973420.1	.	455924	459616	MSTRG.13909.1	1	3693	MSTRG.13909
i	novel	0.0502108	-0.0004096	NW_004973420.1	.	470835	471405	MSTRG.13910.1	1	571	MSTRG.13910
j	novel	0.0422396	-0.094208	NW_004973420.1	-	499381	515290	MSTRG.13912.2	7	2694	MSTRG.13912
j	novel	0.0223266	-0.0110592	NW_004973420.1	-	500538	515311	MSTRG.13912.3	4	2600	MSTRG.13912
j	novel	0.0237319	-0.1024	NW_004973420.1	-	500538	513820	MSTRG.13912.4	7	3366	MSTRG.13912
j	novel	0.0149568	-0.0110592	NW_004973420.1	-	500538	515311	MSTRG.13912.5	5	746	MSTRG.13912
x	novel	0.0249394	-0.156467	NW_004973420.1	+	880708	883024	MSTRG.13928.1	2	2232	MSTRG.13928
i	novel	0.155745	-0.057344	NW_004973420.1	+	896900	902302	MSTRG.13931.1	2	5331	MSTRG.13931
j	novel	0.0943561	-0.08192	NW_004973420.1	+	1229926	1331834	MSTRG.13937.2	6	4318	MSTRG.13937
u	novel	0.13692	-0.024576	NW_004973192.1	.	11064484	11068360	MSTRG.1394.1	1	3877	MSTRG.1394
j	novel	0.2991	-0.0372736	NW_004973420.1	-	2108510	2111107	MSTRG.13952.1	2	2001	MSTRG.13952
u	novel	0.160734	-0.04096	NW_004973420.1	.	2051738	2055170	MSTRG.13953.1	1	3433	MSTRG.13953
j	novel	0.455836	-0.0733184	NW_004973420.1	+	2118934	2121229	MSTRG.13958.5	2	2016	MSTRG.13958
j	novel	0.0647296	-0.0770048	NW_004973420.1	+	2445961	2448090	MSTRG.13979.2	6	889	MSTRG.13979
u	novel	0.455684	-0.0073728	NW_004973420.1	-	2708759	2709544	MSTRG.13988.1	1	786	MSTRG.13988
i	novel	0.139386	-0.008192	NW_004973420.1	-	2778073	2781886	MSTRG.13992.1	2	3725	MSTRG.13992
j	novel	0.0490605	-0.018432	NW_004973420.1	-	2985923	2995121	MSTRG.13998.1	2	3200	MSTRG.13998
i	novel	0.0107621	-0.0712704	NW_004973420.1	.	3069837	3071373	MSTRG.14002.1	1	1537	MSTRG.14002
j	novel	0.0367595	-0.069632	NW_004973420.1	+	3442232	3444035	MSTRG.14019.1	2	1575	MSTRG.14019
u	novel	0.0140946	-0.0004096	NW_004973421.1	+	1	243	MSTRG.14022.1	1	243	MSTRG.14022
u	novel	0.0290856	-0.008192	NW_004973421.1	.	506510	506720	MSTRG.14027.1	1	211	MSTRG.14027
u	novel	0.192337	-0.073728	NW_004973421.1	.	508071	508320	MSTRG.14028.1	1	250	MSTRG.14028
i	novel	0.456582	-0.045056	NW_004973421.1	.	535977	536338	MSTRG.14030.1	1	362	MSTRG.14030
u	novel	0.019817	-0.0155648	NW_004973421.1	.	329726	330249	MSTRG.14032.1	1	524	MSTRG.14032
u	novel	0.0504824	-0.0155648	NW_004973421.1	.	856305	857109	MSTRG.14037.1	1	805	MSTRG.14037
u	novel	0.10861	-0.069632	NW_004973421.1	.	946458	946749	MSTRG.14038.1	1	292	MSTRG.14038
j	novel	0.0824382	-0.0282624	NW_004973421.1	+	1030899	1109581	MSTRG.14047.1	4	3139	MSTRG.14047
j	novel	0.0137533	-0.0618496	NW_004973421.1	+	1030899	1102853	MSTRG.14047.2	4	1074	MSTRG.14047
o	novel	0.0265957	-0.0155648	NW_004973421.1	+	1030899	1065553	MSTRG.14047.3	3	1475	MSTRG.14047
j	novel	0.122162	-0.0618496	NW_004973421.1	+	1031331	1102853	MSTRG.14047.4	3	3592	MSTRG.14047
x	novel	0.0330161	-0.086016	NW_004973421.1	+	1083906	1085616	MSTRG.14049.1	2	572	MSTRG.14049
i	novel	0.0291569	-0.0974848	NW_004973421.1	.	1628966	1629293	MSTRG.14062.1	1	328	MSTRG.14062
i	novel	0.0699926	-0.0692224	NW_004973421.1	.	1640625	1640855	MSTRG.14063.1	1	231	MSTRG.14063
o	novel	0.0406035	-0.11223	NW_004973421.1	+	1947726	2027949	MSTRG.14077.1	2	340	MSTRG.14077
o	novel	0.113149	-0.012288	NW_004973421.1	+	1954770	2015503	MSTRG.14078.1	3	4953	MSTRG.14078
o	novel	0.0969712	-0.012288	NW_004973421.1	+	1964657	2015491	MSTRG.14078.2	3	5065	MSTRG.14078
o	novel	0.253057	-0.012288	NW_004973421.1	+	1965382	2015502	MSTRG.14078.3	3	4874	MSTRG.14078
u	novel	0.0122115	-0.0557056	NW_004973421.1	+	1955763	1956046	MSTRG.14079.1	2	262	MSTRG.14079
u	novel	0.327322	-0.024576	NW_004973421.1	.	1957763	1958338	MSTRG.14080.1	1	576	MSTRG.14080
o	novel	0.0579155	-0.0270336	NW_004973421.1	+	1987453	2027163	MSTRG.14083.1	2	371	MSTRG.14083
o	novel	0.0230111	-0.0561152	NW_004973421.1	+	2000229	2016784	MSTRG.14084.1	2	264	MSTRG.14084
u	novel	0.0308676	-0.0360448	NW_004973421.1	-	2049686	2049926	MSTRG.14086.1	1	241	MSTRG.14086
u	novel	0.110157	-0.028672	NW_004973421.1	.	2207697	2210720	MSTRG.14092.1	1	3024	MSTRG.14092
u	novel	0.0345794	-0.059392	NW_004973421.1	.	2538518	2539035	MSTRG.14093.1	1	518	MSTRG.14093
u	novel	0.00905131	-0.024576	NW_004973421.1	+	2279042	2279334	MSTRG.14095.1	1	293	MSTRG.14095
i	novel	0.156053	-0.110592	NW_004973421.1	.	2422569	2423294	MSTRG.14098.1	1	726	MSTRG.14098
u	novel	0.0642666	-0.065536	NW_004973192.1	-	11334614	11341172	MSTRG.1410.1	1	6559	MSTRG.1410
j	novel	0.150736	-0.118784	NW_004973421.1	+	2634044	2642500	MSTRG.14101.2	4	703	MSTRG.14101
j	novel	0.232121	-0.0217088	NW_004973421.1	-	2683294	2735883	MSTRG.14102.2	8	3451	MSTRG.14102
j	novel	0.0300917	-0.012288	NW_004973421.1	-	2744982	2754469	MSTRG.14102.5	3	2811	MSTRG.14102
j	novel	0.0174751	-0.049152	NW_004973421.1	-	2745021	2754467	MSTRG.14102.6	3	2485	MSTRG.14102
j	novel	0.0174751	-0.049152	NW_004973421.1	-	2745021	2754451	MSTRG.14102.7	2	2563	MSTRG.14102
u	novel	0.0636152	-0.049152	NW_004973421.1	.	2849028	2849497	MSTRG.14104.1	1	470	MSTRG.14104
i	novel	0.0209487	-0.04096	NW_004973422.1	.	780199	780430	MSTRG.14107.1	1	232	MSTRG.14107
i	novel	0.0307231	-0.06144	NW_004973422.1	+	929599	931564	MSTRG.14109.1	1	1966	MSTRG.14109
u	novel	0.0471252	-0.0925696	NW_004973422.1	.	56916	57477	MSTRG.14110.1	1	562	MSTRG.14110
i	novel	0.0172221	-0.049152	NW_004973422.1	.	215127	215420	MSTRG.14112.1	1	294	MSTRG.14112
u	novel	0.048545	-0.016384	NW_004973422.1	-	1008720	1013028	MSTRG.14118.1	3	1229	MSTRG.14118
j	novel	0.170003	-0.0274432	NW_004973192.1	+	11364928	11385612	MSTRG.1412.1	4	2977	MSTRG.1412
x	novel	0.0696676	-0.024576	NW_004973422.1	-	1281611	1282076	MSTRG.14127.1	3	357	MSTRG.14127
u	novel	0.0772544	-0.0200704	NW_004973422.1	.	1734792	1737381	MSTRG.14129.1	1	2590	MSTRG.14129
o	novel	0.404826	-0.02048	NW_004973422.1	-	1918382	1937327	MSTRG.14132.5	2	18858	MSTRG.14132
i	novel	0.0308745	-0.14336	NW_004973422.1	-	1871997	1891676	MSTRG.14133.1	2	639	MSTRG.14133
x	novel	0.25859	-0.0212992	NW_004973422.1	+	1963481	1970557	MSTRG.14135.1	2	6979	MSTRG.14135
u	novel	0.245762	-0.151552	NW_004973422.1	-	1475077	1493682	MSTRG.14139.1	3	18082	MSTRG.14139
u	novel	0.245762	-0.151552	NW_004973422.1	-	1475099	1493652	MSTRG.14139.2	3	18030	MSTRG.14139
u	novel	0.147827	-0.21504	NW_004973422.1	-	1477537	1493668	MSTRG.14139.3	3	15986	MSTRG.14139
u	novel	0.147827	-0.210534	NW_004973422.1	-	1477547	1493428	MSTRG.14139.4	3	15736	MSTRG.14139
u	novel	0.059884	-0.0004096	NW_004973422.1	-	1519697	1526904	MSTRG.14140.1	2	7156	MSTRG.14140
u	novel	0.279363	-0.0299008	NW_004973422.1	+	1519697	1542200	MSTRG.14141.1	2	22445	MSTRG.14141
u	novel	0.0697612	-0.0299008	NW_004973422.1	+	1526594	1542157	MSTRG.14141.2	3	15419	MSTRG.14141
u	novel	0.043728	-0.0585728	NW_004973422.1	+	1542316	1547735	MSTRG.14142.1	2	5335	MSTRG.14142
u	novel	0.0545348	-0.057344	NW_004973422.1	-	1542322	1547735	MSTRG.14143.1	2	5328	MSTRG.14143
u	novel	0.371671	-0.008192	NW_004973422.1	+	1561674	1568111	MSTRG.14145.1	2	6358	MSTRG.14145
u	novel	0.0750821	-0.16384	NW_004973422.1	-	1563851	1568111	MSTRG.14146.1	2	4202	MSTRG.14146
u	novel	0.154729	-0.0315392	NW_004973422.1	+	1568171	1603770	MSTRG.14147.1	1	35600	MSTRG.14147
u	novel	0.154729	-0.0315392	NW_004973422.1	+	1568192	1603774	MSTRG.14147.2	2	35547	MSTRG.14147
u	novel	0.116915	-0.0290816	NW_004973422.1	-	1578137	1603960	MSTRG.14148.1	1	25824	MSTRG.14148
u	novel	0.168119	-0.0602112	NW_004973422.1	-	1626677	1665903	MSTRG.14150.1	7	38748	MSTRG.14150
u	novel	0.178083	-0.0016384	NW_004973422.1	-	1648417	1660378	MSTRG.14150.2	3	11829	MSTRG.14150
u	novel	0.0894529	-0.0999424	NW_004973422.1	-	1671988	1683768	MSTRG.14154.1	2	11704	MSTRG.14154
u	novel	0.134918	-0.0618496	NW_004973422.1	-	1671988	1681558	MSTRG.14154.2	3	9455	MSTRG.14154
u	novel	0.335865	-0.0004096	NW_004973422.1	+	1683840	1689360	MSTRG.14155.1	2	5471	MSTRG.14155
u	novel	0.260241	-0.0004096	NW_004973422.1	+	1683840	1687875	MSTRG.14155.2	2	3986	MSTRG.14155
u	novel	0.300946	-0.018432	NW_004973422.1	+	1703488	1707749	MSTRG.14156.1	2	4229	MSTRG.14156
u	novel	0.0498765	-0.0217088	NW_004973422.1	.	1707755	1713983	MSTRG.14157.1	1	6229	MSTRG.14157
u	novel	0.382015	-0.024576	NW_004973422.1	.	1720472	1722139	MSTRG.14158.1	1	1668	MSTRG.14158
u	novel	0.0116125	-0.0004096	NW_004973422.1	.	1982314	1982559	MSTRG.14167.1	1	246	MSTRG.14167
x	novel	0.0236872	-0.0004096	NW_004973422.1	+	2020613	2021677	MSTRG.14169.1	2	975	MSTRG.14169
x	novel	0.0234517	-0.0004096	NW_004973422.1	+	2020613	2021656	MSTRG.14169.2	3	865	MSTRG.14169
x	novel	0.0209352	-0.0004096	NW_004973422.1	+	2020618	2021663	MSTRG.14169.3	3	867	MSTRG.14169
i	novel	0.0308259	-0.147456	NW_004973422.1	-	2106148	2183888	MSTRG.14172.1	2	326	MSTRG.14172
j	novel	0.0249366	-0.094208	NW_004973422.1	-	2605412	2619647	MSTRG.14177.1	5	793	MSTRG.14177
u	novel	0.191598	-0.0606208	NW_004973423.1	-	87738	103962	MSTRG.14193.3	2	16138	MSTRG.14193
x	novel	0.197111	-0.0569344	NW_004973178.1	+	887592	890802	MSTRG.142.1	2	3130	MSTRG.142
u	novel	0.0283005	-0.012288	NW_004973424.1	+	14827	18074	MSTRG.14204.1	1	3248	MSTRG.14204
i	novel	0.0294602	-0.0712704	NW_004973424.1	.	128293	128930	MSTRG.14208.1	1	638	MSTRG.14208
u	novel	0.0279399	-0.0790528	NW_004973424.1	.	353395	353670	MSTRG.14211.1	1	276	MSTRG.14211
u	novel	0.0148569	-0.0004096	NW_004973424.1	.	692592	692852	MSTRG.14215.1	1	261	MSTRG.14215
j	novel	0.061375	-0.036864	NW_004973424.1	-	1245697	1251303	MSTRG.14220.7	2	5246	MSTRG.14220
i	novel	0.0810436	-0.0196608	NW_004973424.1	.	1149847	1151132	MSTRG.14221.1	1	1286	MSTRG.14221
j	novel	0.0736075	-0.086016	NW_004973424.1	+	1772973	1776120	MSTRG.14230.2	2	1820	MSTRG.14230
u	novel	0.0438194	-0.036864	NW_004973425.1	-	53987	55573	MSTRG.14232.1	1	1587	MSTRG.14232
u	novel	0.0450669	-0.036864	NW_004973425.1	-	53987	55573	MSTRG.14232.2	2	1231	MSTRG.14232
u	novel	0.0724118	-0.0311296	NW_004973425.1	+	56610	62524	MSTRG.14233.1	2	5850	MSTRG.14233
u	novel	0.142477	-0.0569344	NW_004973425.1	+	68726	71169	MSTRG.14235.1	1	2444	MSTRG.14235
j	novel	0.0986814	-0.049152	NW_004973425.1	+	111403	124627	MSTRG.14237.2	4	3474	MSTRG.14237
j	novel	0.128787	-0.028672	NW_004973425.1	+	111403	124627	MSTRG.14237.3	3	3379	MSTRG.14237
j	novel	0.150153	-0.100352	NW_004973425.1	-	169298	173673	MSTRG.14241.4	4	2356	MSTRG.14241
j	novel	0.322641	-0.10281	NW_004973425.1	-	169375	173685	MSTRG.14241.5	3	1747	MSTRG.14241
j	novel	0.168566	-0.10281	NW_004973425.1	-	169375	173673	MSTRG.14241.6	6	2266	MSTRG.14241
i	novel	0.0184215	-0.0536576	NW_004973425.1	+	169487	170638	MSTRG.14242.1	2	1044	MSTRG.14242
o	novel	0.273314	-0.02048	NW_004973425.1	+	203291	229311	MSTRG.14243.2	2	3712	MSTRG.14243
j	novel	0.038425	-0.0294912	NW_004973425.1	+	237001	278470	MSTRG.14244.1	5	2140	MSTRG.14244
x	novel	0.194968	-0.045056	NW_004973425.1	-	359676	363255	MSTRG.14247.1	2	3214	MSTRG.14247
j	novel	0.0275849	-0.0782336	NW_004973425.1	-	618168	620487	MSTRG.14253.2	3	1168	MSTRG.14253
u	novel	0.060672	-0.171213	NW_004973425.1	-	1219540	1220936	MSTRG.14267.1	1	1397	MSTRG.14267
i	novel	0.0178929	-0.012288	NW_004973425.1	-	1317853	1319898	MSTRG.14273.1	3	1926	MSTRG.14273
u	novel	0.0205399	-0.0114688	NW_004973425.1	.	1489927	1493761	MSTRG.14276.1	1	3835	MSTRG.14276
u	novel	0.0267728	-0.0446464	NW_004973425.1	.	1550219	1550997	MSTRG.14278.1	1	779	MSTRG.14278
i	novel	0.0486607	-0.065536	NW_004973427.1	+	353044	355982	MSTRG.14303.1	2	2891	MSTRG.14303
u	novel	0.129884	-0.0077824	NW_004973427.1	-	380279	413716	MSTRG.14307.1	2	33376	MSTRG.14307
u	novel	0.0489212	-0.0270336	NW_004973427.1	-	398449	411359	MSTRG.14307.2	2	12868	MSTRG.14307
i	novel	0.0680234	-0.0647168	NW_004973427.1	-	419345	423868	MSTRG.14308.1	3	4414	MSTRG.14308
x	novel	0.428055	-0.018432	NW_004973427.1	-	507777	528118	MSTRG.14312.1	3	1172	MSTRG.14312
u	novel	0.041811	-0.0167936	NW_004973427.1	-	524785	528042	MSTRG.14312.2	3	550	MSTRG.14312
x	novel	0.0218487	-0.0528384	NW_004973426.1	+	65279	140235	MSTRG.14317.1	2	1829	MSTRG.14317
x	novel	0.291905	-0.0557056	NW_004973426.1	+	65279	155718	MSTRG.14317.2	3	11088	MSTRG.14317
i	novel	0.16375	-0.0094208	NW_004973426.1	+	140307	152399	MSTRG.14317.3	2	8819	MSTRG.14317
i	novel	0.0336224	-0.032768	NW_004973192.1	+	12164071	12164569	MSTRG.1432.1	1	499	MSTRG.1432
x	novel	0.00324424	-0.053248	NW_004973426.1	+	107590	107857	MSTRG.14320.1	2	246	MSTRG.14320
i	novel	0.0429135	-0.094208	NW_004973426.1	-	114256	152350	MSTRG.14321.1	2	4986	MSTRG.14321
o	novel	0.27363	-0.004096	NW_004973426.1	+	134303	278512	MSTRG.14322.1	2	3656	MSTRG.14322
u	novel	0.0425503	-0.090112	NW_004973426.1	-	180482	181076	MSTRG.14323.1	1	595	MSTRG.14323
u	novel	0.101017	-0.016384	NW_004973426.1	+	220949	226752	MSTRG.14327.1	2	5754	MSTRG.14327
j	novel	0.213998	-0.0131072	NW_004973426.1	+	233734	242478	MSTRG.14329.1	2	8671	MSTRG.14329
o	novel	0.186212	-0.0131072	NW_004973426.1	+	233734	242480	MSTRG.14329.2	2	8674	MSTRG.14329
x	novel	0.0564644	-0.057344	NW_004973426.1	+	382326	421047	MSTRG.14332.1	2	1813	MSTRG.14332
u	novel	0.0451322	-0.0241664	NW_004973426.1	+	405585	407278	MSTRG.14333.1	2	1622	MSTRG.14333
u	novel	0.247994	-0.0360448	NW_004973426.1	+	407324	418690	MSTRG.14334.1	2	5946	MSTRG.14334
o	novel	0.109499	-0.0405504	NW_004973426.1	-	407366	699506	MSTRG.14335.1	2	2343	MSTRG.14335
u	novel	0.277043	-0.0303104	NW_004973426.1	-	412578	419765	MSTRG.14337.1	2	7140	MSTRG.14337
u	novel	0.0238046	-0.032768	NW_004973426.1	+	419165	420436	MSTRG.14338.1	2	1229	MSTRG.14338
o	novel	0.108269	-0.0294912	NW_004973426.1	-	427128	808953	MSTRG.14339.1	4	4630	MSTRG.14339
i	novel	0.221141	-0.0282624	NW_004973426.1	-	792510	796079	MSTRG.14339.3	3	3447	MSTRG.14339
u	novel	0.170669	-0.02048	NW_004973426.1	-	434968	437027	MSTRG.14340.1	2	2021	MSTRG.14340
u	novel	0.212997	-0.069632	NW_004973426.1	+	437176	452998	MSTRG.14341.1	4	10733	MSTRG.14341
u	novel	0.274072	-0.069632	NW_004973426.1	+	447093	452928	MSTRG.14341.2	2	906	MSTRG.14341
j	novel	0.16404	-0.0344064	NW_004973426.1	+	799626	819147	MSTRG.14351.11	5	13188	MSTRG.14351
j	novel	0.162335	-0.0319488	NW_004973426.1	+	799634	819208	MSTRG.14351.12	6	13007	MSTRG.14351
i	novel	0.0314237	-0.08192	NW_004973426.1	+	784981	786083	MSTRG.14351.9	2	1029	MSTRG.14351
j	novel	0.0762422	-0.0323584	NW_004973426.1	-	779716	783291	MSTRG.14352.1	2	1398	MSTRG.14352
i	novel	0.0163627	-0.167936	NW_004973426.1	-	784981	786080	MSTRG.14354.1	2	1026	MSTRG.14354
i	novel	0.0106754	-0.0004096	NW_004973427.1	.	718527	718846	MSTRG.14365.1	1	320	MSTRG.14365
u	novel	0.164507	-0.0155648	NW_004973427.1	-	892147	919737	MSTRG.14372.1	2	684	MSTRG.14372
u	novel	0.0561307	-0.032768	NW_004973427.1	-	892147	919737	MSTRG.14372.2	3	809	MSTRG.14372
u	novel	0.106621	-0.1024	NW_004973427.1	.	1233557	1235688	MSTRG.14376.1	1	2132	MSTRG.14376
u	novel	0.0690402	-0.016384	NW_004973427.1	.	1237587	1240439	MSTRG.14377.1	1	2853	MSTRG.14377
u	novel	0.110337	-0.04096	NW_004973427.1	.	1243237	1250060	MSTRG.14378.1	1	6824	MSTRG.14378
j	novel	0.0417419	-0.045056	NW_004973427.1	-	1197361	1223386	MSTRG.14381.1	5	1720	MSTRG.14381
x	novel	0.0224359	-0.065536	NW_004973428.1	+	73163	73497	MSTRG.14384.1	2	276	MSTRG.14384
u	novel	0.0937257	-0.0618496	NW_004973428.1	+	98962	110589	MSTRG.14385.1	3	6071	MSTRG.14385
u	novel	0.00876403	-0.0004096	NW_004973428.1	.	175794	176097	MSTRG.14386.1	1	304	MSTRG.14386
u	novel	0.0383065	-0.0004096	NW_004973428.1	.	601143	601566	MSTRG.14394.1	1	424	MSTRG.14394
u	novel	0.00593718	-0.0004096	NW_004973428.1	.	997189	997398	MSTRG.14398.1	1	210	MSTRG.14398
i	novel	0.0641769	-0.09216	NW_004973428.1	.	1833424	1833705	MSTRG.14402.1	1	282	MSTRG.14402
u	novel	0.0133754	-0.0004096	NW_004973428.1	.	2625806	2626046	MSTRG.14406.1	1	241	MSTRG.14406
u	novel	0.00368942	-0.185549	NW_004973428.1	.	2947851	2948089	MSTRG.14407.1	1	239	MSTRG.14407
i	novel	0.102473	-0.0221184	NW_004973428.1	+	3181059	3197641	MSTRG.14412.1	3	16432	MSTRG.14412
i	novel	0.102473	-0.0221184	NW_004973428.1	+	3181926	3197638	MSTRG.14412.2	2	15665	MSTRG.14412
i	novel	0.175429	-0.0462848	NW_004973428.1	-	3203674	3224495	MSTRG.14413.2	3	20714	MSTRG.14413
i	novel	0.130051	-0.0217088	NW_004973428.1	+	3203677	3218300	MSTRG.14414.1	2	14550	MSTRG.14414
i	novel	0.0527193	-0.045056	NW_004973428.1	+	3273569	3277557	MSTRG.14415.1	2	3915	MSTRG.14415
i	novel	0.148022	-0.0172032	NW_004973428.1	-	3283111	3286960	MSTRG.14416.1	2	3813	MSTRG.14416
i	novel	0.0814381	-0.0196608	NW_004973428.1	+	3721772	3730137	MSTRG.14418.1	2	8281	MSTRG.14418
i	novel	0.0454707	-0.0299008	NW_004973428.1	+	3732321	3735988	MSTRG.14419.1	1	3668	MSTRG.14419
j	novel	0.0199621	-0.0024576	NW_004973428.1	+	3960806	3965921	MSTRG.14425.2	2	3512	MSTRG.14425
i	novel	0.0227582	-0.012288	NW_004973428.1	+	4165682	4167167	MSTRG.14431.1	2	1417	MSTRG.14431
j	novel	0.129092	-0.0303104	NW_004973428.1	+	4726114	4737962	MSTRG.14442.3	4	2247	MSTRG.14442
j	novel	0.432328	-0.0303104	NW_004973428.1	+	4726755	4737859	MSTRG.14442.4	4	2304	MSTRG.14442
i	novel	0.0831403	-0.004096	NW_004973428.1	-	5063000	5065994	MSTRG.14450.1	1	2995	MSTRG.14450
u	novel	0.0156792	-0.0708608	NW_004973428.1	.	6021177	6021642	MSTRG.14451.1	1	466	MSTRG.14451
o	novel	0.0579941	-0.0004096	NW_004973428.1	-	5308734	5336613	MSTRG.14455.1	2	755	MSTRG.14455
u	novel	0.0269509	-0.045056	NW_004973428.1	.	6769790	6770692	MSTRG.14467.1	1	903	MSTRG.14467
i	novel	0.069408	-0.006144	NW_004973428.1	-	7285590	7301068	MSTRG.14482.1	1	15479	MSTRG.14482
i	novel	0.0580597	-0.008192	NW_004973428.1	-	7294129	7301054	MSTRG.14482.2	2	6834	MSTRG.14482
j	novel	0.0365034	-0.0053248	NW_004973428.1	-	7481839	7485820	MSTRG.14485.1	3	3483	MSTRG.14485
j	novel	0.0275155	-0.06144	NW_004973428.1	-	7482057	7485823	MSTRG.14485.2	3	2196	MSTRG.14485
j	novel	0.0128749	-0.04096	NW_004973428.1	-	7482891	7485820	MSTRG.14485.3	3	1360	MSTRG.14485
j	novel	0.0114721	-0.0004096	NW_004973428.1	-	7482891	7485779	MSTRG.14485.4	4	1379	MSTRG.14485
j	novel	0.0313215	-0.0319488	NW_004973429.1	-	9541	16482	MSTRG.14491.1	4	4039	MSTRG.14491
i	novel	0.0359968	-0.131482	NW_004973429.1	-	174680	175460	MSTRG.14497.1	1	781	MSTRG.14497
u	novel	0.030923	-0.004096	NW_004973430.1	.	302726	303020	MSTRG.14502.1	1	295	MSTRG.14502
i	novel	0.0260255	-0.0802816	NW_004973430.1	+	293688	294384	MSTRG.14504.1	1	697	MSTRG.14504
i	novel	0.0154254	-0.0188416	NW_004973430.1	-	293688	294384	MSTRG.14505.1	1	697	MSTRG.14505
u	novel	0.109116	-0.028672	NW_004973430.1	.	294703	295273	MSTRG.14506.1	1	571	MSTRG.14506
u	novel	0.0125093	-0.0004096	NW_004973430.1	.	419442	419730	MSTRG.14507.1	1	289	MSTRG.14507
u	novel	0.00651843	-0.0376832	NW_004973430.1	.	534924	535202	MSTRG.14508.1	1	279	MSTRG.14508
u	novel	0.105716	-0.0372736	NW_004973431.1	-	236475	240157	MSTRG.14509.1	2	845	MSTRG.14509
u	novel	0.0383826	-0.0372736	NW_004973431.1	-	236475	240157	MSTRG.14509.2	2	883	MSTRG.14509
j	novel	0.079314	-0.036864	NW_004973192.1	-	12785789	12789950	MSTRG.1451.5	2	2277	MSTRG.1451
u	novel	0.0331406	-0.002048	NW_004973431.1	-	407072	410341	MSTRG.14513.1	2	2027	MSTRG.14513
u	novel	0.0681112	-0.002048	NW_004973431.1	-	407778	410344	MSTRG.14513.2	2	1091	MSTRG.14513
u	novel	0.25904	-0.036864	NW_004973431.1	-	442659	444102	MSTRG.14516.1	2	698	MSTRG.14516
j	novel	0.301631	-0.0069632	NW_004973431.1	+	533256	546041	MSTRG.14521.3	4	4886	MSTRG.14521
o	novel	0.0763335	-0.049152	NW_004973431.1	-	569215	573880	MSTRG.14523.1	3	4575	MSTRG.14523
i	novel	0.0314285	-0.045056	NW_004973431.1	-	621524	622903	MSTRG.14524.1	2	1305	MSTRG.14524
u	novel	0.0149105	-0.0004096	NW_004973431.1	.	1118639	1118872	MSTRG.14531.1	1	234	MSTRG.14531
u	novel	0.0803827	-0.0278528	NW_004973431.1	+	1267278	1294662	MSTRG.14532.1	3	799	MSTRG.14532
j	novel	0.165634	-0.034816	NW_004973431.1	+	879973	924770	MSTRG.14533.5	4	1160	MSTRG.14533
j	novel	0.0219587	-0.0438272	NW_004973431.1	+	879973	924383	MSTRG.14533.6	4	933	MSTRG.14533
i	novel	0.177414	-0.0483328	NW_004973431.1	-	961665	987753	MSTRG.14534.1	2	8517	MSTRG.14534
j	novel	0.183154	-0.004096	NW_004973431.1	+	1024380	1067387	MSTRG.14536.16	3	3131	MSTRG.14536
j	novel	0.206903	-0.004096	NW_004973431.1	+	1024381	1071549	MSTRG.14536.17	3	1141	MSTRG.14536
i	novel	0.067938	-0.036864	NW_004973431.1	.	1085106	1085598	MSTRG.14537.1	1	493	MSTRG.14537
j	novel	0.0164646	-0.0241664	NW_004973431.1	-	1704989	1859513	MSTRG.14538.3	5	651	MSTRG.14538
u	novel	0.0641816	-0.04096	NW_004973192.1	-	12864499	12888527	MSTRG.1454.1	4	1675	MSTRG.1454
j	novel	0.181009	-0.02048	NW_004973431.1	+	1924268	2021716	MSTRG.14544.1	3	535	MSTRG.14544
j	novel	0.103281	-0.034816	NW_004973431.1	+	2151896	2186205	MSTRG.14544.6	2	1096	MSTRG.14544
i	novel	0.00274795	-0.024576	NW_004973431.1	+	2079721	2080077	MSTRG.14545.1	1	357	MSTRG.14545
u	novel	0.160155	-0.199475	NW_004973433.1	.	335	538	MSTRG.14546.1	1	204	MSTRG.14546
x	novel	0.0651544	-0.098304	NW_004973431.1	+	2210137	2214630	MSTRG.14547.1	4	990	MSTRG.14547
i	novel	0.173829	-0.012288	NW_004973431.1	.	2228696	2229001	MSTRG.14549.1	1	306	MSTRG.14549
u	novel	0.0276896	-0.0057344	NW_004973192.1	.	12890037	12892456	MSTRG.1455.1	1	2420	MSTRG.1455
u	novel	0.0295892	-0.012288	NW_004973431.1	.	2263678	2265126	MSTRG.14550.1	1	1449	MSTRG.14550
x	novel	0.0154729	-0.0114688	NW_004973434.1	-	8216	32244	MSTRG.14553.1	2	1395	MSTRG.14553
u	novel	0.251929	-0.02048	NW_004973434.1	.	36133	43065	MSTRG.14554.1	1	6933	MSTRG.14554
u	novel	0.0340994	-0.036864	NW_004973434.1	.	49737	50723	MSTRG.14555.1	1	987	MSTRG.14555
u	novel	0.0458031	-0.0065536	NW_004973434.1	+	180311	181527	MSTRG.14559.1	2	583	MSTRG.14559
u	novel	0.100731	-0.008192	NW_004973434.1	+	204987	209245	MSTRG.14561.1	2	4154	MSTRG.14561
u	novel	0.0313845	-0.028672	NW_004973434.1	.	288023	289611	MSTRG.14565.1	1	1589	MSTRG.14565
u	novel	0.0798093	-0.0708608	NW_004973434.1	.	622509	622836	MSTRG.14570.1	1	328	MSTRG.14570
i	novel	0.205344	-0.0622592	NW_004973434.1	+	558591	568243	MSTRG.14573.1	2	9615	MSTRG.14573
i	novel	0.205344	-0.0118784	NW_004973434.1	+	559328	568255	MSTRG.14573.2	3	8832	MSTRG.14573
o	novel	0.155472	-0.016384	NW_004973434.1	-	640099	644904	MSTRG.14575.1	2	4736	MSTRG.14575
i	novel	0.436083	-0.028672	NW_004973434.1	.	647790	649332	MSTRG.14576.1	1	1543	MSTRG.14576
o	novel	0.153456	-0.0094208	NW_004973434.1	-	750405	758008	MSTRG.14579.6	2	7552	MSTRG.14579
u	novel	0.06014	-0.002048	NW_004973435.1	+	7219	20100	MSTRG.14583.1	1	12882	MSTRG.14583
u	novel	0.055677	-0.0417792	NW_004973435.1	+	40483	47440	MSTRG.14585.1	2	6914	MSTRG.14585
u	novel	0.0166957	-0.0004096	NW_004973435.1	.	75098	75938	MSTRG.14587.1	1	841	MSTRG.14587
u	novel	0.00823466	-0.0024576	NW_004973435.1	.	93173	93553	MSTRG.14588.1	1	381	MSTRG.14588
u	novel	0.0411754	-0.053248	NW_004973435.1	-	340832	347744	MSTRG.14590.1	2	1695	MSTRG.14590
u	novel	0.10577	-0.0688128	NW_004973436.1	.	1	2139	MSTRG.14593.1	1	2139	MSTRG.14593
i	novel	0.0318039	-0.024576	NW_004973436.1	.	43666	43943	MSTRG.14595.1	1	278	MSTRG.14595
x	novel	0.0178599	-0.147866	NW_004973436.1	-	5271	5819	MSTRG.14597.1	2	213	MSTRG.14597
i	novel	0.0107051	-0.0077824	NW_004973436.1	.	7967	8435	MSTRG.14598.1	1	469	MSTRG.14598
u	novel	0.120875	-0.0053248	NW_004973436.1	.	544371	544746	MSTRG.14611.1	1	376	MSTRG.14611
x	novel	0.0385834	-0.0581632	NW_004973436.1	-	575003	576028	MSTRG.14614.1	2	1006	MSTRG.14614
u	novel	7.84379e-07	-0.147456	NW_004973436.1	.	585311	585698	MSTRG.14615.1	1	388	MSTRG.14615
u	novel	0.0970238	-0.139264	NW_004973437.1	.	89927	90163	MSTRG.14616.1	1	237	MSTRG.14616
o	novel	0.114135	-0.0356352	NW_004973436.1	-	114559	150659	MSTRG.14621.1	2	954	MSTRG.14621
i	novel	0.0560784	-0.0315392	NW_004973436.1	+	205471	207189	MSTRG.14626.1	2	1231	MSTRG.14626
o	novel	0.0688437	-0.0876544	NW_004973437.1	+	1061348	1098084	MSTRG.14637.1	2	321	MSTRG.14637
i	novel	0.0672312	-0.049152	NW_004973437.1	-	1072365	1072598	MSTRG.14638.1	1	234	MSTRG.14638
x	novel	0.0148066	-0.0004096	NW_004973437.1	-	1093774	1094114	MSTRG.14640.1	3	232	MSTRG.14640
i	novel	0.145808	-0.0208896	NW_004973437.1	-	1129433	1130597	MSTRG.14642.1	1	1165	MSTRG.14642
i	novel	0.087709	-0.145408	NW_004973438.1	-	23107	23679	MSTRG.14645.1	2	539	MSTRG.14645
j	novel	0.0666862	-0.012288	NW_004973438.1	+	522506	528422	MSTRG.14647.1	3	2544	MSTRG.14647
u	novel	0.00823016	-0.0004096	NW_004973439.1	.	369953	370418	MSTRG.14664.1	1	466	MSTRG.14664
u	novel	0.0706168	-0.0004096	NW_004973439.1	.	379515	380897	MSTRG.14665.1	1	1383	MSTRG.14665
u	novel	0.00829777	-0.0004096	NW_004973439.1	.	484056	484349	MSTRG.14666.1	1	294	MSTRG.14666
u	novel	0.0483139	-0.0004096	NW_004973439.1	.	490421	491456	MSTRG.14667.1	1	1036	MSTRG.14667
j	novel	0.0511333	-0.02048	NW_004973439.1	+	980645	988500	MSTRG.14670.2	3	2536	MSTRG.14670
u	novel	0.325788	-0.01024	NW_004973439.1	.	1097697	1098458	MSTRG.14671.1	1	762	MSTRG.14671
u	novel	0.0149381	-0.024576	NW_004973439.1	+	1279986	1282396	MSTRG.14675.1	1	2411	MSTRG.14675
i	novel	0.271729	-0.0118784	NW_004973439.1	+	2489986	2490532	MSTRG.14689.1	1	547	MSTRG.14689
i	novel	0.0310734	-0.0405504	NW_004973192.1	.	13598506	13599547	MSTRG.1469.1	1	1042	MSTRG.1469
i	novel	0.135307	-0.278528	NW_004973439.1	+	2515942	2516391	MSTRG.14690.1	1	450	MSTRG.14690
u	novel	0.128967	-0.04096	NW_004973439.1	.	3147952	3149556	MSTRG.14691.1	1	1605	MSTRG.14691
j	novel	0.212652	-0.0131072	NW_004973439.1	-	3300535	3322238	MSTRG.14696.1	4	2053	MSTRG.14696
j	novel	0.193907	-0.0131072	NW_004973439.1	-	3300535	3321334	MSTRG.14696.2	4	1795	MSTRG.14696
u	novel	0.0280044	-0.002048	NW_004973439.1	+	3532872	3534769	MSTRG.14702.1	2	1540	MSTRG.14702
u	novel	0.0528736	-0.008192	NW_004973439.1	.	3551475	3553689	MSTRG.14703.1	1	2215	MSTRG.14703
u	novel	0.0941421	-0.016384	NW_004973439.1	.	4178469	4178688	MSTRG.14706.1	1	220	MSTRG.14706
j	novel	0.0493601	-0.024576	NW_004973439.1	-	5130096	5137984	MSTRG.14716.1	3	658	MSTRG.14716
i	novel	0.0704036	-0.0004096	NW_004973439.1	.	4993744	4994064	MSTRG.14719.1	1	321	MSTRG.14719
i	novel	0.246545	-0.045056	NW_004973439.1	-	5003886	5010740	MSTRG.14720.1	2	6623	MSTRG.14720
i	novel	0.107253	-0.0364544	NW_004973439.1	+	5004382	5028516	MSTRG.14721.1	2	23184	MSTRG.14721
u	novel	0.0181333	-0.0557056	NW_004973439.1	.	5965521	5965779	MSTRG.14734.1	1	259	MSTRG.14734
u	novel	0.00437119	-0.0004096	NW_004973439.1	.	6299533	6299821	MSTRG.14742.1	1	289	MSTRG.14742
x	novel	0.0301975	-0.0487424	NW_004973439.1	-	6150366	6150906	MSTRG.14747.1	2	480	MSTRG.14747
i	novel	0.0167918	-0.016384	NW_004973439.1	.	6234087	6234361	MSTRG.14750.1	1	275	MSTRG.14750
j	novel	0.0598856	-0.146227	NW_004973440.1	-	19173	20643	MSTRG.14753.1	3	370	MSTRG.14753
u	novel	0.0225728	-0.008192	NW_004973440.1	.	78116	79159	MSTRG.14758.1	1	1044	MSTRG.14758
u	novel	0.156323	-0.0270336	NW_004973440.1	.	75494	76114	MSTRG.14761.1	1	621	MSTRG.14761
j	novel	0.0145497	-0.0135168	NW_004973192.1	-	14144569	14168697	MSTRG.1477.13	3	494	MSTRG.1477
j	novel	0.01339	-0.0131072	NW_004973192.1	-	14144569	14168697	MSTRG.1477.14	3	491	MSTRG.1477
x	novel	0.00956533	-0.0602112	NW_004973440.1	+	179958	180244	MSTRG.14771.1	2	267	MSTRG.14771
u	novel	0.0468146	-0.065536	NW_004973442.1	.	148996	149671	MSTRG.14774.1	1	676	MSTRG.14774
u	novel	0.0420242	-0.0884736	NW_004973442.1	.	217744	217975	MSTRG.14775.1	1	232	MSTRG.14775
u	novel	0.0104934	-0.045056	NW_004973442.1	.	229051	229551	MSTRG.14776.1	1	501	MSTRG.14776
i	novel	0.0103265	-0.028672	NW_004973442.1	-	379203	379484	MSTRG.14778.1	1	282	MSTRG.14778
i	novel	0.116153	-0.0217088	NW_004973442.1	.	460557	464191	MSTRG.14779.1	1	3635	MSTRG.14779
u	novel	0.0956153	-0.0176128	NW_004973443.1	.	6356	6684	MSTRG.14780.1	1	329	MSTRG.14780
i	novel	0.0114947	-0.598016	NW_004973444.1	.	352791	353007	MSTRG.14785.1	1	217	MSTRG.14785
i	novel	0.0310292	-0.0360448	NW_004973444.1	+	392982	393846	MSTRG.14789.1	1	865	MSTRG.14789
i	novel	0.384293	-0.0299008	NW_004973444.1	+	409605	417424	MSTRG.14790.1	2	7702	MSTRG.14790
x	novel	0.138807	-0.0004096	NW_004973444.1	+	418147	421900	MSTRG.14791.1	2	3699	MSTRG.14791
i	novel	0.0155017	-0.0610304	NW_004973444.1	+	425985	428575	MSTRG.14792.1	2	2517	MSTRG.14792
i	novel	0.157899	-0.028672	NW_004973444.1	+	428667	438955	MSTRG.14793.1	2	8228	MSTRG.14793
i	novel	0.0298151	-0.024576	NW_004973444.1	+	461213	465046	MSTRG.14795.1	2	3747	MSTRG.14795
u	novel	0.114143	-0.004096	NW_004973444.1	+	500614	507783	MSTRG.14796.1	2	7116	MSTRG.14796
u	novel	0.114328	-0.0630784	NW_004973444.1	+	501350	513965	MSTRG.14796.2	2	12560	MSTRG.14796
i	novel	0.00900346	-0.0004096	NW_004973444.1	.	750924	751192	MSTRG.14800.1	1	269	MSTRG.14800
u	novel	0.135575	-0.08192	NW_004973444.1	.	1241878	1242161	MSTRG.14802.1	1	284	MSTRG.14802
u	novel	0.0328753	-0.160563	NW_004973444.1	.	1381492	1381786	MSTRG.14803.1	1	295	MSTRG.14803
u	novel	0.159865	-0.0909312	NW_004973444.1	-	1591094	1591416	MSTRG.14805.1	1	323	MSTRG.14805
u	novel	0.00448335	-0.0004096	NW_004973444.1	.	1686562	1686845	MSTRG.14806.1	1	284	MSTRG.14806
u	novel	0.0149733	-0.0417792	NW_004973444.1	.	1773043	1773450	MSTRG.14807.1	1	408	MSTRG.14807
u	novel	0.0878937	-0.195379	NW_004973444.1	.	2132285	2132511	MSTRG.14808.1	1	227	MSTRG.14808
j	novel	0.148944	-0.073728	NW_004973192.1	+	14212594	14280393	MSTRG.1481.2	3	597	MSTRG.1481
j	novel	0.00641275	-0.0004096	NW_004973444.1	-	1950464	1984234	MSTRG.14810.3	6	416	MSTRG.14810
u	novel	0.013016	-0.024576	NW_004973446.1	.	462237	462494	MSTRG.14817.1	1	258	MSTRG.14817
u	novel	0.0107996	-0.0770048	NW_004973446.1	.	462918	463158	MSTRG.14818.1	1	241	MSTRG.14818
i	novel	0.0337058	-0.094208	NW_004973446.1	+	333839	338128	MSTRG.14822.1	2	4224	MSTRG.14822
j	novel	0.0967141	-0.0114688	NW_004973446.1	-	524368	542370	MSTRG.14830.1	3	2804	MSTRG.14830
j	novel	0.178445	-0.0114688	NW_004973446.1	-	525683	539913	MSTRG.14830.2	3	825	MSTRG.14830
j	novel	0.0651284	-0.0229376	NW_004973446.1	+	1310589	1332392	MSTRG.14841.1	7	2329	MSTRG.14841
u	novel	0.326081	-0.04096	NW_004973446.1	+	1310589	1324131	MSTRG.14841.2	4	5334	MSTRG.14841
j	novel	0.0937505	-0.0311296	NW_004973446.1	+	1310614	1331509	MSTRG.14841.3	6	1795	MSTRG.14841
u	novel	0.333699	-0.0253952	NW_004973446.1	+	1310614	1322108	MSTRG.14841.4	5	3174	MSTRG.14841
u	novel	0.280907	-0.04096	NW_004973446.1	+	1310614	1323646	MSTRG.14841.5	4	2329	MSTRG.14841
i	novel	0.0565927	-0.0086016	NW_004973446.1	-	1978783	1983078	MSTRG.14861.1	2	4250	MSTRG.14861
o	novel	0.0799633	-0.0167936	NW_004973446.1	-	2094342	2137535	MSTRG.14863.1	2	2712	MSTRG.14863
u	novel	0.158489	-0.0438272	NW_004973446.1	+	2432737	2445321	MSTRG.14872.1	3	12510	MSTRG.14872
x	novel	0.261714	-0.0466944	NW_004973446.1	-	2492451	2493685	MSTRG.14875.1	2	1212	MSTRG.14875
j	novel	0.0253288	-0.121242	NW_004973446.1	-	2576150	2577126	MSTRG.14884.1	5	672	MSTRG.14884
x	novel	0.1857	-0.100352	NW_004973446.1	-	2634614	2635251	MSTRG.14894.1	2	537	MSTRG.14894
u	novel	0.291086	-0.0262144	NW_004973446.1	-	2638344	2644308	MSTRG.14895.1	2	5907	MSTRG.14895
i	novel	0.057522	-0.059392	NW_004973192.1	-	14417315	14419625	MSTRG.1490.1	2	2213	MSTRG.1490
u	novel	0.123759	-0.038912	NW_004973446.1	-	2855199	2856745	MSTRG.14909.1	1	1547	MSTRG.14909
i	novel	0.150602	-0.0159744	NW_004973192.1	-	14483256	14490592	MSTRG.1492.1	1	7337	MSTRG.1492
j	novel	0.38189	-0.0475136	NW_004973446.1	-	3569380	3799517	MSTRG.14923.3	5	665	MSTRG.14923
j	novel	0.0492328	-0.0151552	NW_004973446.1	-	3734409	3769764	MSTRG.14923.5	4	1601	MSTRG.14923
i	novel	0.0434211	-0.0425984	NW_004973192.1	-	14581094	14584314	MSTRG.1493.1	1	3221	MSTRG.1493
i	novel	0.0174336	-0.0557056	NW_004973449.1	.	342003	342709	MSTRG.14931.1	1	707	MSTRG.14931
u	novel	0.0591372	-0.105677	NW_004973449.1	-	484236	484968	MSTRG.14934.1	2	703	MSTRG.14934
j	novel	0.260521	-0.0548864	NW_004973449.1	-	896364	912250	MSTRG.14946.1	5	4271	MSTRG.14946
j	novel	0.150063	-0.0548864	NW_004973449.1	-	896364	912760	MSTRG.14946.2	5	3871	MSTRG.14946
j	novel	0.274005	-0.0548864	NW_004973449.1	-	896364	912250	MSTRG.14946.3	5	3711	MSTRG.14946
j	novel	0.260521	-0.0548864	NW_004973449.1	-	896364	912220	MSTRG.14946.4	5	4314	MSTRG.14946
u	novel	0.012747	-0.159744	NW_004973449.1	.	982459	982701	MSTRG.14948.1	1	243	MSTRG.14948
u	novel	0.169029	-0.028672	NW_004973450.1	.	1769460	1769899	MSTRG.14990.1	1	440	MSTRG.14990
j	novel	0.0669355	-0.04096	NW_004973450.1	-	1904518	1907284	MSTRG.14994.1	2	2331	MSTRG.14994
i	novel	0.178302	-0.0004096	NW_004973175.1	.	252317	252554	MSTRG.15.1	1	238	MSTRG.15
i	novel	0.0412802	-0.0172032	NW_004973450.1	.	2190554	2198732	MSTRG.15003.1	1	8179	MSTRG.15003
i	novel	0.104895	-0.0069632	NW_004973450.1	+	2202300	2257372	MSTRG.15004.1	2	14657	MSTRG.15004
i	novel	0.0308949	-0.057344	NW_004973450.1	+	2284163	2288018	MSTRG.15005.1	2	2395	MSTRG.15005
i	novel	0.013072	-0.0446464	NW_004973450.1	.	2298486	2301408	MSTRG.15006.1	1	2923	MSTRG.15006
i	novel	0.00911156	-0.028672	NW_004973450.1	.	2431210	2431466	MSTRG.15008.1	1	257	MSTRG.15008
i	novel	0.0173809	-0.045056	NW_004973450.1	.	2459159	2461393	MSTRG.15009.1	1	2235	MSTRG.15009
i	novel	0.124938	-0.0507904	NW_004973450.1	.	2518508	2520210	MSTRG.15010.1	1	1703	MSTRG.15010
i	novel	0.042863	-0.045056	NW_004973450.1	.	2533308	2533686	MSTRG.15011.1	1	379	MSTRG.15011
o	novel	0.182759	-0.0262144	NW_004973450.1	+	2669632	3035877	MSTRG.15012.1	2	11332	MSTRG.15012
u	novel	0.0715723	-0.006144	NW_004973450.1	+	3137819	3139578	MSTRG.15018.1	1	1760	MSTRG.15018
u	novel	0.0787932	-0.28672	NW_004973192.1	.	15158121	15158337	MSTRG.1502.1	1	217	MSTRG.1502
j	novel	0.0596266	-0.028672	NW_004973450.1	+	3355321	3383251	MSTRG.15028.1	4	1649	MSTRG.15028
u	novel	0.113524	-0.598016	NW_004973450.1	.	3480414	3480958	MSTRG.15030.1	1	545	MSTRG.15030
j	novel	0.0341009	-0.118784	NW_004973450.1	+	3797113	3810984	MSTRG.15034.5	3	3398	MSTRG.15034
j	novel	0.040887	-0.0356352	NW_004973450.1	-	3810988	3816878	MSTRG.15035.2	5	882	MSTRG.15035
j	novel	0.0514159	-0.0679936	NW_004973450.1	-	3812321	3816879	MSTRG.15035.3	5	1034	MSTRG.15035
j	novel	0.0309343	-0.02048	NW_004973450.1	-	3812502	3816892	MSTRG.15035.4	5	944	MSTRG.15035
u	novel	0.00538405	-0.0004096	NW_004973450.1	.	4650297	4650522	MSTRG.15045.1	1	226	MSTRG.15045
u	novel	0.0508424	-0.036864	NW_004973450.1	.	4787779	4788166	MSTRG.15048.1	1	388	MSTRG.15048
u	novel	0.0108467	-0.0004096	NW_004973450.1	.	5265253	5265668	MSTRG.15050.1	1	416	MSTRG.15050
j	novel	0.366707	-0.0688128	NW_004973192.1	+	15167497	15184959	MSTRG.1506.2	9	879	MSTRG.1506
i	novel	0.0824593	-0.0032768	NW_004973450.1	-	6753418	6756108	MSTRG.15065.1	1	2691	MSTRG.15065
u	novel	0.101163	-0.094208	NW_004973450.1	.	6858354	6859579	MSTRG.15066.1	1	1226	MSTRG.15066
j	novel	0.128749	-0.0774144	NW_004973450.1	-	7299801	7307995	MSTRG.15080.1	5	5596	MSTRG.15080
i	novel	0.24034	-0.0004096	NW_004973450.1	+	7686471	7710129	MSTRG.15092.1	1	23659	MSTRG.15092
i	novel	0.184571	-0.0241664	NW_004973450.1	-	7766000	7769312	MSTRG.15094.5	2	1884	MSTRG.15094
i	novel	0.204158	-0.0290816	NW_004973450.1	.	7947484	7948902	MSTRG.15097.1	1	1419	MSTRG.15097
i	novel	0.134815	-0.012288	NW_004973450.1	.	8024247	8025423	MSTRG.15098.1	1	1177	MSTRG.15098
i	novel	0.0232235	-0.069632	NW_004973179.1	+	94721	98806	MSTRG.151.1	2	3997	MSTRG.151
j	novel	0.0546367	-0.045056	NW_004973450.1	+	8840393	8843881	MSTRG.15101.1	3	763	MSTRG.15101
u	novel	0.24235	-0.0700416	NW_004973450.1	+	8866737	8886886	MSTRG.15102.1	2	978	MSTRG.15102
u	novel	0.108667	-0.032768	NW_004973450.1	.	8300370	8309711	MSTRG.15105.1	1	9342	MSTRG.15105
u	novel	0.0329507	-0.008192	NW_004973451.1	+	1	5931	MSTRG.15109.1	3	3567	MSTRG.15109
i	novel	0.118563	-0.0380928	NW_004973451.1	-	100627	111969	MSTRG.15113.1	2	11302	MSTRG.15113
i	novel	0.0546718	-0.032768	NW_004973451.1	+	132756	137493	MSTRG.15114.1	2	4624	MSTRG.15114
x	novel	1.84406e-05	-0.0004096	NW_004973451.1	+	1155440	1155707	MSTRG.15127.1	2	211	MSTRG.15127
i	novel	0.170203	-0.0086016	NW_004973451.1	.	1172723	1173322	MSTRG.15131.1	1	600	MSTRG.15131
u	novel	0.100585	-0.057344	NW_004973451.1	+	1255389	1258810	MSTRG.15133.1	1	3422	MSTRG.15133
u	novel	0.0435449	-0.0249856	NW_004973451.1	+	1258884	1268301	MSTRG.15134.1	2	9334	MSTRG.15134
x	novel	0.00352492	-0.0823296	NW_004973452.1	-	67633	140275	MSTRG.15138.1	2	450	MSTRG.15138
x	novel	0.00352492	-0.0823296	NW_004973452.1	-	67633	140275	MSTRG.15138.2	3	450	MSTRG.15138
u	novel	0.0234069	-0.02048	NW_004973452.1	.	246330	247162	MSTRG.15150.1	1	833	MSTRG.15150
u	novel	0.404318	-0.0569344	NW_004973452.1	.	247864	251704	MSTRG.15151.1	1	3841	MSTRG.15151
j	novel	0.361136	-0.121242	NW_004973452.1	+	287344	295833	MSTRG.15153.4	9	4619	MSTRG.15153
u	novel	0.174966	-0.0004096	NW_004973452.1	.	662007	662532	MSTRG.15156.1	1	526	MSTRG.15156
u	novel	0.0139027	-0.032768	NW_004973452.1	.	659806	660015	MSTRG.15157.1	1	210	MSTRG.15157
j	novel	0.0248633	-0.0495616	NW_004973452.1	+	610935	612573	MSTRG.15158.1	3	1195	MSTRG.15158
u	novel	0.0411046	-0.0004096	NW_004973452.1	.	679642	679902	MSTRG.15161.1	1	261	MSTRG.15161
j	novel	0.0410888	-0.0933888	NW_004973452.1	+	318943	333815	MSTRG.15163.4	2	1073	MSTRG.15163
j	novel	0.0404183	-0.0004096	NW_004973452.1	+	319413	328587	MSTRG.15163.5	3	1109	MSTRG.15163
j	novel	0.0371632	-0.0978944	NW_004973452.1	+	405619	414152	MSTRG.15166.1	3	3076	MSTRG.15166
j	novel	0.484531	-0.0589824	NW_004973453.1	+	193662	196180	MSTRG.15183.2	4	1480	MSTRG.15183
u	novel	0.100659	-0.101581	NW_004973453.1	.	519778	520032	MSTRG.15185.1	1	255	MSTRG.15185
j	novel	0.19103	-0.0434176	NW_004973453.1	-	637915	645887	MSTRG.15190.1	2	5135	MSTRG.15190
j	novel	0.0130211	-0.0004096	NW_004973453.1	-	644758	645899	MSTRG.15190.4	2	263	MSTRG.15190
i	novel	0.0158289	-0.0516096	NW_004973454.1	-	119236	119457	MSTRG.15199.6	1	222	MSTRG.15199
u	novel	0.043919	-0.038912	NW_004973454.1	-	1146947	1170993	MSTRG.15203.1	2	262	MSTRG.15203
j	novel	0.218624	-0.028672	NW_004973454.1	-	1502196	1509480	MSTRG.15204.2	2	6900	MSTRG.15204
u	novel	0.0715078	-0.0065536	NW_004973453.1	-	1054688	1057193	MSTRG.15209.1	1	2506	MSTRG.15209
x	novel	0.0656934	-0.135168	NW_004973454.1	-	1566938	1577457	MSTRG.15217.1	3	727	MSTRG.15217
i	novel	0.00590887	-0.0438272	NW_004973454.1	.	1843455	1844156	MSTRG.15220.1	1	702	MSTRG.15220
i	novel	0.00320598	-0.0004096	NW_004973454.1	.	1906584	1906814	MSTRG.15221.1	1	231	MSTRG.15221
u	novel	0.00782968	-0.057344	NW_004973454.1	.	2480273	2480481	MSTRG.15226.1	1	209	MSTRG.15226
u	novel	0.189555	-0.257229	NW_004973455.1	-	305	592	MSTRG.15228.1	1	288	MSTRG.15228
i	novel	0.139588	-0.142541	NW_004973455.1	-	26531	26776	MSTRG.15230.1	1	246	MSTRG.15230
j	novel	0.106133	-0.063488	NW_004973456.1	-	499994	519552	MSTRG.15235.7	4	758	MSTRG.15235
j	novel	0.112802	-0.0004096	NW_004973456.1	-	730304	784219	MSTRG.15237.1	4	3115	MSTRG.15237
j	novel	0.112026	-0.0004096	NW_004973456.1	-	730949	784161	MSTRG.15237.3	3	2327	MSTRG.15237
j	novel	0.0269243	-0.0032768	NW_004973456.1	-	737977	749779	MSTRG.15237.4	3	1703	MSTRG.15237
j	novel	0.0571314	-0.0421888	NW_004973456.1	-	898172	1154994	MSTRG.15238.4	5	1351	MSTRG.15238
j	novel	0.0390182	-0.0479232	NW_004973456.1	-	1153849	1154989	MSTRG.15238.8	2	521	MSTRG.15238
o	novel	0.0774096	-0.0282624	NW_004973456.1	+	1155093	1166356	MSTRG.15240.2	2	11161	MSTRG.15240
i	novel	0.0688905	-0.086016	NW_004973456.1	+	1263691	1275749	MSTRG.15244.1	2	11948	MSTRG.15244
i	novel	0.221596	-0.016384	NW_004973456.1	-	1643866	1648958	MSTRG.15248.1	2	4982	MSTRG.15248
i	novel	0.0416762	-0.0233472	NW_004973456.1	-	1646409	1648647	MSTRG.15248.2	2	2128	MSTRG.15248
x	novel	0.0135064	-0.108134	NW_004973456.1	-	1684057	1685085	MSTRG.15250.1	2	947	MSTRG.15250
j	novel	0.0174136	-0.0004096	NW_004973456.1	-	1786201	1818121	MSTRG.15254.2	2	422	MSTRG.15254
j	novel	0.0177301	-0.0004096	NW_004973456.1	-	1786201	1818121	MSTRG.15254.3	3	505	MSTRG.15254
j	novel	0.0140919	-0.131072	NW_004973456.1	-	1799592	1818121	MSTRG.15254.4	3	725	MSTRG.15254
u	novel	0.0277842	-0.0331776	NW_004973457.1	.	333139	333430	MSTRG.15255.1	1	292	MSTRG.15255
j	novel	0.00965144	-0.0647168	NW_004973457.1	+	365313	367176	MSTRG.15258.2	3	1054	MSTRG.15258
j	novel	0.0103654	-0.0647168	NW_004973457.1	+	365313	367176	MSTRG.15258.3	3	1106	MSTRG.15258
j	novel	0.0104311	-0.0647168	NW_004973457.1	+	365375	367176	MSTRG.15258.4	3	1047	MSTRG.15258
j	novel	0.0510152	-0.024576	NW_004973457.1	-	438030	475859	MSTRG.15259.2	2	388	MSTRG.15259
u	novel	0.0381189	-0.028672	NW_004973457.1	.	603910	604281	MSTRG.15260.1	1	372	MSTRG.15260
u	novel	0.0222288	-0.0618496	NW_004973457.1	.	649732	650669	MSTRG.15263.1	1	938	MSTRG.15263
u	novel	0.375649	-0.0999424	NW_004973457.1	-	655251	662919	MSTRG.15264.1	2	7607	MSTRG.15264
u	novel	0.0731008	-0.0937984	NW_004973457.1	+	660860	662938	MSTRG.15265.1	1	2079	MSTRG.15265
u	novel	0.155517	-0.0004096	NW_004973457.1	.	681446	681656	MSTRG.15267.1	1	211	MSTRG.15267
u	novel	0.294087	-0.0487424	NW_004973458.1	.	5320	6421	MSTRG.15268.1	1	1102	MSTRG.15268
j	novel	0.113747	-0.0258048	NW_004973192.1	+	15885902	15903409	MSTRG.1527.2	3	422	MSTRG.1527
u	novel	0.0477392	-0.045056	NW_004973458.1	+	149894	150188	MSTRG.15271.1	1	295	MSTRG.15271
i	novel	0.045879	-0.012288	NW_004973458.1	.	272137	272436	MSTRG.15274.1	1	300	MSTRG.15274
x	novel	0.149561	-0.004096	NW_004973459.1	+	1	7196	MSTRG.15292.1	2	1151	MSTRG.15292
x	novel	0.154023	-0.004096	NW_004973459.1	+	1	7196	MSTRG.15292.2	2	1151	MSTRG.15292
i	novel	0.0170946	-0.016384	NW_004973459.1	+	4610	5022	MSTRG.15293.1	1	413	MSTRG.15293
i	novel	0.0359488	-0.069632	NW_004973458.1	-	648076	649654	MSTRG.15297.1	3	1512	MSTRG.15297
i	novel	0.0441654	-0.012288	NW_004973458.1	-	649735	656760	MSTRG.15298.1	3	6906	MSTRG.15298
u	novel	0.0595933	-0.0008192	NW_004973460.1	+	2111	95635	MSTRG.15299.1	6	1298	MSTRG.15299
i	novel	0.0343174	-0.180224	NW_004973192.1	.	16127118	16127771	MSTRG.1530.1	1	654	MSTRG.1530
u	novel	0.0281331	-0.0405504	NW_004973459.1	-	98408	99084	MSTRG.15303.1	2	240	MSTRG.15303
j	novel	0.0119261	-0.0016384	NW_004973460.1	+	700480	748095	MSTRG.15314.4	4	889	MSTRG.15314
u	novel	0.0570754	-0.053248	NW_004973460.1	.	941896	944531	MSTRG.15323.1	1	2636	MSTRG.15323
u	novel	0.0773153	-0.0663552	NW_004973460.1	.	1349970	1350285	MSTRG.15327.1	1	316	MSTRG.15327
u	novel	0.102737	-0.0421888	NW_004973460.1	-	1047222	1062080	MSTRG.15329.1	3	14759	MSTRG.15329
u	novel	0.0404439	-0.004096	NW_004973460.1	+	1062291	1067817	MSTRG.15331.1	3	5369	MSTRG.15331
u	novel	0.0247187	-0.045056	NW_004973460.1	-	1067828	1073134	MSTRG.15332.1	1	5307	MSTRG.15332
u	novel	0.0359947	-0.002048	NW_004973460.1	-	1073177	1081660	MSTRG.15333.1	2	8444	MSTRG.15333
u	novel	0.0359947	-0.002048	NW_004973460.1	-	1073185	1081647	MSTRG.15333.2	3	8358	MSTRG.15333
u	novel	0.154671	-0.0004096	NW_004973460.1	+	1079719	1086385	MSTRG.15334.1	2	6538	MSTRG.15334
i	novel	0.0297167	-0.0004096	NW_004973460.1	-	1111884	1112673	MSTRG.15335.1	2	713	MSTRG.15335
i	novel	0.082612	-0.006144	NW_004973460.1	-	1170882	1173425	MSTRG.15336.1	1	2544	MSTRG.15336
i	novel	0.0678716	-0.012288	NW_004973460.1	-	1177906	1182103	MSTRG.15338.1	2	4109	MSTRG.15338
x	novel	0.0175586	-0.094208	NW_004973462.1	-	9149	15096	MSTRG.15342.1	2	261	MSTRG.15342
x	novel	0.0255182	-0.117555	NW_004973462.1	-	10404	16621	MSTRG.15344.1	2	491	MSTRG.15344
x	novel	0.0835077	-0.02048	NW_004973462.1	-	10857	16948	MSTRG.15345.1	2	365	MSTRG.15345
j	novel	0.0612232	-0.165888	NW_004973462.1	+	44424	46429	MSTRG.15349.2	5	701	MSTRG.15349
j	novel	0.0269818	-0.0745472	NW_004973462.1	+	66093	67138	MSTRG.15349.3	5	539	MSTRG.15349
x	novel	0.17733	-0.201114	NW_004973462.1	-	36990	37295	MSTRG.15350.1	2	276	MSTRG.15350
u	novel	0.167237	-0.0176128	NW_004973462.1	.	195011	195449	MSTRG.15361.1	1	439	MSTRG.15361
i	novel	0.00328628	-0.139264	NW_004973462.1	+	466416	466640	MSTRG.15368.1	1	225	MSTRG.15368
u	novel	0.0268007	-0.0475136	NW_004973462.1	+	476383	478277	MSTRG.15369.1	2	1806	MSTRG.15369
u	novel	0.0190691	-0.127386	NW_004973462.1	.	478716	479304	MSTRG.15370.1	1	589	MSTRG.15370
u	novel	0.0191333	-0.0167936	NW_004973462.1	-	211746	213488	MSTRG.15374.1	1	1743	MSTRG.15374
o	novel	0.0806249	-0.0376832	NW_004973462.1	-	272820	338349	MSTRG.15378.1	2	2783	MSTRG.15378
i	novel	0.0521265	-0.0589824	NW_004973462.1	+	305184	305745	MSTRG.15381.1	1	562	MSTRG.15381
u	novel	0.192827	-0.0319488	NW_004973462.1	-	382433	386142	MSTRG.15385.1	2	3054	MSTRG.15385
u	novel	0.178016	-0.0331776	NW_004973462.1	-	382590	386088	MSTRG.15385.2	2	2873	MSTRG.15385
u	novel	0.151784	-0.0692224	NW_004973462.1	-	382951	383870	MSTRG.15385.3	2	774	MSTRG.15385
u	novel	0.156009	-0.032768	NW_004973462.1	-	382951	386264	MSTRG.15385.4	2	2628	MSTRG.15385
x	novel	0.0343586	-0.0172032	NW_004973462.1	+	384147	387136	MSTRG.15386.1	3	2685	MSTRG.15386
u	novel	0.0352509	-0.0172032	NW_004973462.1	+	384168	387122	MSTRG.15386.2	2	2432	MSTRG.15386
u	novel	0.0342644	-0.0172032	NW_004973462.1	+	384168	387122	MSTRG.15386.3	3	2644	MSTRG.15386
x	novel	0.0345616	-0.0172032	NW_004973462.1	+	384170	387133	MSTRG.15386.4	4	2530	MSTRG.15386
x	novel	0.0343499	-0.0172032	NW_004973462.1	+	384170	387133	MSTRG.15386.5	3	2454	MSTRG.15386
u	novel	0.0341801	-0.0172032	NW_004973462.1	+	384280	387089	MSTRG.15386.6	4	2453	MSTRG.15386
u	novel	0.0121594	-0.0004096	NW_004973462.1	+	386411	387089	MSTRG.15386.7	3	564	MSTRG.15386
u	novel	0.222509	-0.004096	NW_004973463.1	-	741874	768990	MSTRG.15389.1	4	816	MSTRG.15389
j	novel	0.00684188	-0.057344	NW_004973463.1	+	863935	873949	MSTRG.15390.6	3	376	MSTRG.15390
u	novel	0.0713168	-0.043008	NW_004973463.1	.	20166	22678	MSTRG.15393.1	1	2513	MSTRG.15393
i	novel	0.190612	-0.0126976	NW_004973463.1	+	422330	438076	MSTRG.15400.1	2	15725	MSTRG.15400
i	novel	0.0315572	-0.024576	NW_004973463.1	-	485416	486169	MSTRG.15401.1	1	754	MSTRG.15401
i	novel	0.0192255	-0.0004096	NW_004973463.1	.	1654552	1655499	MSTRG.15403.1	1	948	MSTRG.15403
j	novel	0.0389272	-0.036864	NW_004973463.1	+	1248185	1285029	MSTRG.15405.3	3	2334	MSTRG.15405
j	novel	0.0316284	-0.024576	NW_004973463.1	-	1702949	1719436	MSTRG.15409.3	6	3033	MSTRG.15409
j	novel	0.0185211	-0.024576	NW_004973463.1	-	1705219	1719419	MSTRG.15409.4	6	836	MSTRG.15409
j	novel	0.0119487	-0.024576	NW_004973463.1	-	1705232	1719417	MSTRG.15409.7	4	497	MSTRG.15409
x	novel	0.00578914	-0.0004096	NW_004973463.1	+	1789446	1789857	MSTRG.15412.1	2	210	MSTRG.15412
i	novel	0.0512548	-0.0671744	NW_004973463.1	.	1862940	1866090	MSTRG.15416.1	1	3151	MSTRG.15416
u	novel	0.141487	-0.0344064	NW_004973463.1	.	2314161	2314461	MSTRG.15419.1	1	301	MSTRG.15419
u	novel	0.105653	-0.073728	NW_004973192.1	.	16670509	16675311	MSTRG.1542.1	1	4803	MSTRG.1542
j	novel	0.0456442	-0.043008	NW_004973463.1	-	2576001	2581520	MSTRG.15429.2	5	2698	MSTRG.15429
u	novel	0.233262	-0.06144	NW_004973464.1	-	78551	87647	MSTRG.15438.1	2	8993	MSTRG.15438
j	novel	0.467632	-0.0544768	NW_004973192.1	-	16289641	16309103	MSTRG.1544.2	5	6020	MSTRG.1544
j	novel	0.0218943	-0.073728	NW_004973464.1	-	511850	525027	MSTRG.15449.5	3	831	MSTRG.15449
o	novel	0.0485968	-0.0475136	NW_004973192.1	+	16300639	16534240	MSTRG.1545.1	2	1916	MSTRG.1545
x	novel	0.0524567	-0.032768	NW_004973465.1	-	72406	73071	MSTRG.15454.1	3	510	MSTRG.15454
u	novel	0.143558	-0.0647168	NW_004973467.1	.	57680	67483	MSTRG.15461.1	1	9804	MSTRG.15461
u	novel	0.0368479	-0.602112	NW_004973467.1	.	70931	72582	MSTRG.15462.1	1	1652	MSTRG.15462
u	novel	0.102516	-0.0528384	NW_004973467.1	-	77164	85854	MSTRG.15463.1	2	8632	MSTRG.15463
u	novel	0.100551	-0.0483328	NW_004973467.1	.	85943	88308	MSTRG.15464.1	1	2366	MSTRG.15464
x	novel	0.0125399	-0.0843776	NW_004973467.1	+	117646	117966	MSTRG.15467.1	2	265	MSTRG.15467
i	novel	5.29081e-07	-0.069632	NW_004973467.1	.	236497	236734	MSTRG.15476.1	1	238	MSTRG.15476
i	novel	0.033175	-0.0004096	NW_004973467.1	.	237086	237698	MSTRG.15477.1	1	613	MSTRG.15477
i	novel	0.164103	-0.002048	NW_004973467.1	+	335870	337588	MSTRG.15487.1	2	1663	MSTRG.15487
x	novel	0.0804085	-0.0475136	NW_004973467.1	-	356956	358776	MSTRG.15490.1	1	1821	MSTRG.15490
j	novel	0.0140461	-0.308429	NW_004973467.1	+	585667	601204	MSTRG.15495.2	2	451	MSTRG.15495
j	novel	0.0287113	-0.318259	NW_004973467.1	+	585667	600242	MSTRG.15495.3	2	1904	MSTRG.15495
j	novel	0.390105	-0.077824	NW_004973467.1	+	769639	782850	MSTRG.15501.3	5	1682	MSTRG.15501
i	novel	0.0110531	-0.036864	NW_004973467.1	.	870872	871171	MSTRG.15504.1	1	300	MSTRG.15504
i	novel	0.00355177	-0.0147456	NW_004973467.1	+	875811	876354	MSTRG.15505.1	1	544	MSTRG.15505
u	novel	0.205467	-0.0036864	NW_004973467.1	.	937320	937993	MSTRG.15507.1	1	674	MSTRG.15507
i	novel	0.159169	-0.0241664	NW_004973467.1	+	1193489	1195662	MSTRG.15528.1	1	2174	MSTRG.15528
i	novel	0.00733863	-0.0004096	NW_004973467.1	+	1242163	1242441	MSTRG.15530.1	1	279	MSTRG.15530
j	novel	0.170925	-0.0528384	NW_004973467.1	+	1243275	1245118	MSTRG.15531.1	2	584	MSTRG.15531
x	novel	0.344153	-0.0155648	NW_004973467.1	+	1260740	1261401	MSTRG.15534.1	2	623	MSTRG.15534
x	novel	0.0238104	-0.008192	NW_004973467.1	+	1260966	1261401	MSTRG.15534.2	2	395	MSTRG.15534
o	novel	0.0331335	-0.0036864	NW_004973468.1	+	88824	94416	MSTRG.15539.1	2	5494	MSTRG.15539
u	novel	0.0137717	-0.18432	NW_004973469.1	.	388997	389429	MSTRG.15552.1	1	433	MSTRG.15552
o	novel	0.117472	-0.0004096	NW_004973469.1	+	390255	398197	MSTRG.15553.1	2	562	MSTRG.15553
o	novel	0.00357321	-0.0004096	NW_004973469.1	+	390255	398131	MSTRG.15553.2	2	496	MSTRG.15553
o	novel	0.00357321	-0.0004096	NW_004973469.1	+	390255	398131	MSTRG.15553.3	2	496	MSTRG.15553
o	novel	0.00357321	-0.0004096	NW_004973469.1	+	390255	398131	MSTRG.15553.4	2	496	MSTRG.15553
j	novel	0.00680384	-0.0864256	NW_004973469.1	+	390257	391862	MSTRG.15553.5	3	1510	MSTRG.15553
x	novel	0.00504695	-0.0978944	NW_004973469.1	-	390943	391262	MSTRG.15554.2	2	264	MSTRG.15554
j	novel	0.0512084	-0.0004096	NW_004973469.1	+	682017	759214	MSTRG.15569.1	6	691	MSTRG.15569
u	novel	0.095252	-0.02048	NW_004973469.1	.	812436	812777	MSTRG.15571.1	1	342	MSTRG.15571
u	novel	0.0230501	-0.0630784	NW_004973469.1	.	1500010	1500548	MSTRG.15580.1	1	539	MSTRG.15580
u	novel	0.0534511	-0.012288	NW_004973469.1	.	1850719	1850998	MSTRG.15585.1	1	280	MSTRG.15585
u	novel	0.0764386	-0.166298	NW_004973469.1	.	2340269	2340489	MSTRG.15592.1	1	221	MSTRG.15592
j	novel	0.0179203	-0.0712704	NW_004973469.1	+	2341016	2343343	MSTRG.15593.1	4	503	MSTRG.15593
u	novel	1.28041e-05	-0.0004096	NW_004973470.1	.	32875	33079	MSTRG.15594.1	1	205	MSTRG.15594
i	novel	0.16464	-0.0004096	NW_004973470.1	.	318684	318895	MSTRG.15606.1	1	212	MSTRG.15606
i	novel	0.224238	-0.008192	NW_004973470.1	+	347818	348349	MSTRG.15607.1	1	532	MSTRG.15607
j	novel	0.0247405	-0.0851968	NW_004973192.1	+	16865896	16870692	MSTRG.1561.2	2	1617	MSTRG.1561
u	novel	0.0346928	-0.008192	NW_004973470.1	.	447065	448887	MSTRG.15610.1	1	1823	MSTRG.15610
i	novel	0.218273	-0.0503808	NW_004973470.1	.	799387	800666	MSTRG.15618.1	1	1280	MSTRG.15618
u	novel	0.0025965	-0.0004096	NW_004973471.1	.	14221	14729	MSTRG.15619.1	1	509	MSTRG.15619
u	novel	0.0168938	-0.0434176	NW_004973470.1	.	1232875	1233099	MSTRG.15623.1	1	225	MSTRG.15623
u	novel	0.0346169	-0.004096	NW_004973471.1	.	17860	19513	MSTRG.15624.1	1	1654	MSTRG.15624
x	novel	0.0441106	-0.0008192	NW_004973471.1	+	181689	213316	MSTRG.15630.1	2	330	MSTRG.15630
j	novel	0.00984779	-0.0598016	NW_004973471.1	+	637454	662914	MSTRG.15632.3	3	589	MSTRG.15632
u	novel	0.0813637	-0.260096	NW_004973471.1	+	919754	948738	MSTRG.15636.1	2	694	MSTRG.15636
u	novel	0.0555246	-0.0008192	NW_004973472.1	-	795	4452	MSTRG.15637.1	2	297	MSTRG.15637
i	novel	0.179826	-0.0045056	NW_004973473.1	.	480268	481141	MSTRG.15648.1	1	874	MSTRG.15648
u	novel	0.0571437	-0.032768	NW_004973473.1	.	565630	565852	MSTRG.15651.1	1	223	MSTRG.15651
u	novel	0.078262	-0.193331	NW_004973473.1	.	713908	714148	MSTRG.15667.1	1	241	MSTRG.15667
u	novel	0.0449728	-0.008192	NW_004973473.1	.	729916	730283	MSTRG.15669.1	1	368	MSTRG.15669
j	novel	0.354248	-0.309248	NW_004973473.1	+	818807	823635	MSTRG.15673.1	3	318	MSTRG.15673
o	novel	0.00654928	-0.0520192	NW_004973192.1	-	17412408	17416052	MSTRG.1568.1	2	2752	MSTRG.1568
u	novel	0.170348	-0.0077824	NW_004973474.1	.	32081	32497	MSTRG.15682.1	1	417	MSTRG.15682
u	novel	0.0233238	-0.0004096	NW_004973476.1	.	13674	13960	MSTRG.15683.1	1	287	MSTRG.15683
j	novel	0.059249	-0.036864	NW_004973476.1	-	139257	139729	MSTRG.15685.2	2	298	MSTRG.15685
u	novel	0.0197589	-0.024576	NW_004973476.1	.	1430127	1430428	MSTRG.15687.1	1	302	MSTRG.15687
u	novel	0.0176358	-0.117146	NW_004973476.1	.	1885492	1886169	MSTRG.15692.1	1	678	MSTRG.15692
u	novel	0.00532027	-0.049152	NW_004973476.1	.	1891570	1891937	MSTRG.15693.1	1	368	MSTRG.15693
j	novel	0.015971	-0.126976	NW_004973476.1	+	1975282	1977420	MSTRG.15695.1	3	1260	MSTRG.15695
j	novel	0.0170373	-0.090112	NW_004973476.1	+	1975352	1977420	MSTRG.15695.3	2	570	MSTRG.15695
u	novel	0.0176417	-0.458752	NW_004973477.1	+	152650	153046	MSTRG.15698.1	1	397	MSTRG.15698
x	novel	0.00622001	-2.9655	NW_004973477.1	+	200084	240665	MSTRG.15707.1	3	691	MSTRG.15707
x	novel	0.0482153	-0.125747	NW_004973477.1	-	335388	335834	MSTRG.15713.1	2	312	MSTRG.15713
x	novel	0.0756985	-0.0925696	NW_004973477.1	-	335388	335825	MSTRG.15713.2	2	270	MSTRG.15713
x	novel	0.0573001	-0.0462848	NW_004973477.1	-	365273	384731	MSTRG.15716.1	2	868	MSTRG.15716
u	novel	0.291988	-0.0282624	NW_004973477.1	+	375888	381086	MSTRG.15718.1	2	5111	MSTRG.15718
u	novel	0.0968795	-0.034816	NW_004973477.1	-	381351	382028	MSTRG.15719.1	1	678	MSTRG.15719
j	novel	0.0527056	-0.0434176	NW_004973192.1	-	17597802	17602219	MSTRG.1572.1	2	3509	MSTRG.1572
j	novel	0.0527056	-0.0434176	NW_004973192.1	-	17597955	17602199	MSTRG.1572.2	2	3005	MSTRG.1572
x	novel	0.0234049	-0.0589824	NW_004973478.1	-	270389	274041	MSTRG.15730.1	2	3596	MSTRG.15730
u	novel	0.007519	-0.0393216	NW_004973478.1	.	380674	381213	MSTRG.15732.1	1	540	MSTRG.15732
i	novel	0.135553	-0.106496	NW_004973478.1	.	359726	359931	MSTRG.15736.1	1	206	MSTRG.15736
u	novel	0.0211757	-0.0004096	NW_004973478.1	.	408688	409241	MSTRG.15738.1	1	554	MSTRG.15738
i	novel	0.0543976	-0.028672	NW_004973478.1	-	164290	170119	MSTRG.15740.1	3	5696	MSTRG.15740
i	novel	0.0890887	-0.094208	NW_004973478.1	+	164817	170533	MSTRG.15741.1	2	5638	MSTRG.15741
i	novel	0.14871	-0.0258048	NW_004973478.1	-	206442	220216	MSTRG.15742.1	3	9738	MSTRG.15742
i	novel	0.132603	-0.0290816	NW_004973478.1	-	213929	220216	MSTRG.15742.2	2	2325	MSTRG.15742
x	novel	0.0121734	-0.0626688	NW_004973478.1	-	446349	447752	MSTRG.15745.1	1	1404	MSTRG.15745
u	novel	0.0230253	-0.0626688	NW_004973478.1	-	446367	448393	MSTRG.15745.2	2	1977	MSTRG.15745
u	novel	0.147217	-0.0589824	NW_004973479.1	+	204067	231903	MSTRG.15756.2	3	4545	MSTRG.15756
i	novel	0.0600574	-0.0004096	NW_004973479.1	.	485544	485923	MSTRG.15760.1	1	380	MSTRG.15760
i	novel	0.0253806	-0.032768	NW_004973479.1	.	634411	637043	MSTRG.15763.1	1	2633	MSTRG.15763
i	novel	0.1435	-0.0004096	NW_004973479.1	.	756704	756927	MSTRG.15766.1	1	224	MSTRG.15766
u	novel	0.0110276	-0.0004096	NW_004973479.1	.	1211341	1211571	MSTRG.15772.1	1	231	MSTRG.15772
u	novel	0.0483271	-0.139264	NW_004973480.1	+	25940	32460	MSTRG.15774.1	2	900	MSTRG.15774
u	novel	0.0677932	-0.139264	NW_004973480.1	+	26057	32450	MSTRG.15774.2	2	773	MSTRG.15774
x	novel	0.132293	-0.0454656	NW_004973480.1	-	47603	48158	MSTRG.15776.1	3	442	MSTRG.15776
x	novel	0.0828031	-0.0229376	NW_004973480.1	-	47635	48158	MSTRG.15776.2	3	290	MSTRG.15776
j	novel	0.10547	-0.0385024	NW_004973480.1	-	300902	309183	MSTRG.15777.5	5	2853	MSTRG.15777
j	novel	0.107416	-0.0704512	NW_004973480.1	-	300981	309048	MSTRG.15777.7	4	3007	MSTRG.15777
j	novel	0.0183529	-0.0458752	NW_004973480.1	+	363594	374798	MSTRG.15778.3	2	1094	MSTRG.15778
u	novel	0.127739	-0.059392	NW_004973481.1	-	65201	65788	MSTRG.15779.1	2	483	MSTRG.15779
u	novel	0.0261049	-0.0004096	NW_004973481.1	+	65481	65788	MSTRG.15780.1	1	308	MSTRG.15780
u	novel	0.0655125	-0.110592	NW_004973483.1	-	336512	345580	MSTRG.15789.1	4	1185	MSTRG.15789
u	novel	0.170457	-0.008192	NW_004973483.1	-	337046	369242	MSTRG.15789.2	4	714	MSTRG.15789
u	novel	0.00765176	-0.049152	NW_004973483.1	-	368200	369208	MSTRG.15789.3	2	515	MSTRG.15789
i	novel	0.0639312	-0.0733184	NW_004973483.1	+	487949	489123	MSTRG.15792.1	1	1175	MSTRG.15792
u	novel	0.231538	-0.0688128	NW_004973483.1	+	498821	500765	MSTRG.15794.1	1	1945	MSTRG.15794
j	novel	0.0838048	-0.0094208	NW_004973483.1	+	998224	1051878	MSTRG.15805.1	3	364	MSTRG.15805
i	novel	0.012571	-0.152371	NW_004973483.1	-	1052805	1054003	MSTRG.15807.2	1	1199	MSTRG.15807
j	novel	0.0948712	-0.049152	NW_004973483.1	-	1260713	1275485	MSTRG.15810.1	6	915	MSTRG.15810
j	novel	0.0848916	-0.049152	NW_004973483.1	-	1260715	1275485	MSTRG.15810.3	6	913	MSTRG.15810
j	novel	0.0398437	-0.016384	NW_004973483.1	-	1261433	1275460	MSTRG.15810.4	5	2152	MSTRG.15810
j	novel	0.068092	-0.0499712	NW_004973483.1	-	2432761	2435631	MSTRG.15818.1	2	2771	MSTRG.15818
x	novel	0.00974163	-0.024576	NW_004973483.1	+	2465314	2465920	MSTRG.15821.2	2	543	MSTRG.15821
i	novel	0.0199251	-0.0176128	NW_004973483.1	.	1957260	1961207	MSTRG.15823.1	1	3948	MSTRG.15823
u	novel	0.088048	-0.016384	NW_004973483.1	+	1973618	1978661	MSTRG.15825.1	1	5044	MSTRG.15825
x	novel	0.0768614	-0.045056	NW_004973483.1	-	2171536	2175447	MSTRG.15827.1	2	3855	MSTRG.15827
u	novel	0.0148957	-0.311296	NW_004973483.1	+	2192916	2193226	MSTRG.15828.1	2	263	MSTRG.15828
u	novel	0.262314	-0.043008	NW_004973483.1	-	2209158	2217889	MSTRG.15829.2	2	8646	MSTRG.15829
j	novel	0.0593507	-0.0364544	NW_004973192.1	-	17951819	17971905	MSTRG.1583.1	2	638	MSTRG.1583
j	novel	0.124595	-0.0598016	NW_004973483.1	-	2677259	2681744	MSTRG.15834.2	3	1276	MSTRG.15834
x	novel	0.0137711	-0.0004096	NW_004973483.1	-	2617760	2618110	MSTRG.15838.1	2	239	MSTRG.15838
x	novel	0.0535647	-0.151962	NW_004973484.1	-	57927	58928	MSTRG.15845.1	2	405	MSTRG.15845
i	novel	0.0558959	-0.0380928	NW_004973484.1	-	51372	52200	MSTRG.15847.1	2	789	MSTRG.15847
o	novel	0.0524525	-0.069632	NW_004973484.1	+	95898	225058	MSTRG.15855.1	2	1386	MSTRG.15855
u	novel	0.492375	-0.0217088	NW_004973484.1	-	95910	97082	MSTRG.15856.1	1	1173	MSTRG.15856
x	novel	0.0361397	-0.0438272	NW_004973484.1	-	295075	296500	MSTRG.15863.1	2	1355	MSTRG.15863
u	novel	0.0367581	-0.0438272	NW_004973484.1	-	295259	296529	MSTRG.15863.2	2	1020	MSTRG.15863
u	novel	0.413734	-0.0499712	NW_004973484.1	-	410595	412443	MSTRG.15864.1	2	1806	MSTRG.15864
j	novel	0.0424202	-0.165069	NW_004973484.1	-	420423	423114	MSTRG.15867.2	3	414	MSTRG.15867
o	novel	0.0402289	-0.0274432	NW_004973484.1	+	393712	396670	MSTRG.15869.10	5	2670	MSTRG.15869
o	novel	0.0338555	-0.0274432	NW_004973484.1	+	393712	396673	MSTRG.15869.11	3	2662	MSTRG.15869
o	novel	0.0452295	-0.0274432	NW_004973484.1	+	393712	396697	MSTRG.15869.12	3	2772	MSTRG.15869
o	novel	0.0338555	-0.0274432	NW_004973484.1	+	393712	396666	MSTRG.15869.13	3	2583	MSTRG.15869
o	novel	0.0452295	-0.0274432	NW_004973484.1	+	393712	396697	MSTRG.15869.14	4	2754	MSTRG.15869
o	novel	0.0338555	-0.0274432	NW_004973484.1	+	393712	396669	MSTRG.15869.15	3	2724	MSTRG.15869
o	novel	0.0452295	-0.0274432	NW_004973484.1	+	393712	396666	MSTRG.15869.16	4	2675	MSTRG.15869
o	novel	0.0452295	-0.0274432	NW_004973484.1	+	393712	396675	MSTRG.15869.17	3	2732	MSTRG.15869
o	novel	0.0522751	-0.0274432	NW_004973484.1	+	393712	396697	MSTRG.15869.18	4	2708	MSTRG.15869
o	novel	0.0460628	-0.0274432	NW_004973484.1	+	393712	396089	MSTRG.15869.19	2	2152	MSTRG.15869
o	novel	0.0338555	-0.0274432	NW_004973484.1	+	393712	396675	MSTRG.15869.20	4	2640	MSTRG.15869
j	novel	0.0552318	-0.0372736	NW_004973484.1	+	361404	371680	MSTRG.15869.3	3	2660	MSTRG.15869
j	novel	0.061455	-0.0372736	NW_004973484.1	+	361552	371673	MSTRG.15869.6	4	2523	MSTRG.15869
i	novel	0.0573391	-0.110592	NW_004973484.1	+	371936	374355	MSTRG.15869.8	2	297	MSTRG.15869
i	novel	0.183463	-0.0303104	NW_004973484.1	-	363155	367681	MSTRG.15870.1	1	4527	MSTRG.15870
i	novel	0.252105	-0.0606208	NW_004973484.1	-	369310	371672	MSTRG.15871.1	2	2309	MSTRG.15871
i	novel	0.0628196	-0.0364544	NW_004973484.1	-	371936	372157	MSTRG.15872.1	1	222	MSTRG.15872
u	novel	0.0482879	-0.0004096	NW_004973484.1	.	699327	699662	MSTRG.15875.1	1	336	MSTRG.15875
x	novel	0.336922	-0.022528	NW_004973484.1	+	451574	452046	MSTRG.15877.1	2	395	MSTRG.15877
j	novel	0.0561083	-0.0036864	NW_004973484.1	-	739097	742561	MSTRG.15894.2	2	3334	MSTRG.15894
x	novel	0.246109	-0.024576	NW_004973484.1	+	727679	732047	MSTRG.15895.1	2	4253	MSTRG.15895
i	novel	0.131626	-0.221184	NW_004973484.1	+	742640	743802	MSTRG.15896.1	1	1163	MSTRG.15896
i	novel	0.0344432	-0.028672	NW_004973484.1	.	800004	802236	MSTRG.15899.1	1	2233	MSTRG.15899
u	novel	0.399652	-0.0446464	NW_004973192.1	+	18150337	18158712	MSTRG.1590.1	1	8376	MSTRG.1590
i	novel	0.184956	-0.0475136	NW_004973484.1	.	888672	889319	MSTRG.15900.1	1	648	MSTRG.15900
j	novel	0.0982868	-0.0516096	NW_004973484.1	-	1007143	1016308	MSTRG.15902.1	3	1471	MSTRG.15902
i	novel	0.0223349	-0.0118784	NW_004973484.1	.	1023608	1025631	MSTRG.15903.1	1	2024	MSTRG.15903
u	novel	0.0113383	-0.036864	NW_004973484.1	.	1258686	1260312	MSTRG.15911.1	1	1627	MSTRG.15911
u	novel	0.111592	-0.155648	NW_004973484.1	+	1309553	1316596	MSTRG.15914.1	2	575	MSTRG.15914
j	novel	0.00510096	-0.016384	NW_004973484.1	+	1494412	1495656	MSTRG.15934.9	4	620	MSTRG.15934
x	novel	0.0523394	-0.024576	NW_004973484.1	-	1495607	1495867	MSTRG.15935.1	2	202	MSTRG.15935
u	novel	0.17982	-0.043008	NW_004973484.1	-	1502151	1502658	MSTRG.15938.1	1	508	MSTRG.15938
u	novel	0.0114132	-0.0004096	NW_004973484.1	.	1503859	1504322	MSTRG.15939.1	1	464	MSTRG.15939
i	novel	0.0411552	-0.103629	NW_004973484.1	-	1559892	1561875	MSTRG.15946.1	1	1984	MSTRG.15946
j	novel	0.155211	-0.0442368	NW_004973484.1	+	1651106	1668362	MSTRG.15947.1	5	1376	MSTRG.15947
j	novel	0.394152	-0.0442368	NW_004973484.1	+	1651106	1670850	MSTRG.15947.2	5	1001	MSTRG.15947
i	novel	0.0892085	-0.17367	NW_004973484.1	+	1675519	1675775	MSTRG.15949.1	1	257	MSTRG.15949
u	novel	0.0304513	-0.0335872	NW_004973484.1	.	1805274	1805629	MSTRG.15957.1	1	356	MSTRG.15957
x	novel	0.041898	-0.034816	NW_004973484.1	-	1808274	1809428	MSTRG.15959.1	3	301	MSTRG.15959
j	novel	0.261332	-0.234701	NW_004973484.1	-	1818276	1818851	MSTRG.15960.1	2	478	MSTRG.15960
j	novel	0.113703	-0.117965	NW_004973484.1	-	1867553	1869112	MSTRG.15966.2	3	462	MSTRG.15966
u	novel	0.374371	-0.0475136	NW_004973484.1	-	2090320	2104300	MSTRG.15977.2	4	1935	MSTRG.15977
u	novel	0.4067	-0.0475136	NW_004973484.1	-	2090421	2099896	MSTRG.15977.3	3	1851	MSTRG.15977
u	novel	0.18674	-0.045056	NW_004973484.1	+	2104603	2105657	MSTRG.15978.1	1	1055	MSTRG.15978
u	novel	0.120997	-0.0180224	NW_004973484.1	-	2105945	2108806	MSTRG.15979.1	3	444	MSTRG.15979
i	novel	0.0840178	-0.0565248	NW_004973484.1	+	2152351	2155103	MSTRG.15983.1	2	2672	MSTRG.15983
i	novel	0.228119	-0.0393216	NW_004973484.1	-	2171995	2175133	MSTRG.15984.1	1	3139	MSTRG.15984
j	novel	0.0462272	-0.0049152	NW_004973484.1	+	2263716	2285812	MSTRG.15999.2	5	797	MSTRG.15999
j	novel	0.0190028	-0.0335872	NW_004973484.1	+	2263919	2264735	MSTRG.15999.3	2	267	MSTRG.15999
o	novel	0.0383771	-0.073728	NW_004973484.1	+	2282754	2285037	MSTRG.15999.4	2	2149	MSTRG.15999
j	novel	0.055391	-0.06144	NW_004973484.1	+	2282757	2284537	MSTRG.15999.5	2	1501	MSTRG.15999
o	novel	0.209656	-0.0233472	NW_004973484.1	-	2266242	2271028	MSTRG.16000.3	2	4723	MSTRG.16000
i	novel	0.0457048	-0.0544768	NW_004973485.1	.	968777	969102	MSTRG.16024.1	1	326	MSTRG.16024
i	novel	0.017529	-0.0004096	NW_004973485.1	.	981360	981683	MSTRG.16025.1	1	324	MSTRG.16025
u	novel	0.0191097	-0.008192	NW_004973485.1	+	1007944	1027163	MSTRG.16026.1	2	447	MSTRG.16026
j	novel	0.184618	-0.128205	NW_004973485.1	+	1341367	1371612	MSTRG.16029.3	4	1319	MSTRG.16029
u	novel	0.156348	-0.008192	NW_004973485.1	.	2107822	2108094	MSTRG.16036.1	1	273	MSTRG.16036
u	novel	0.368345	-0.0262144	NW_004973485.1	.	2109062	2109651	MSTRG.16037.1	1	590	MSTRG.16037
u	novel	0.109679	-0.0712704	NW_004973486.1	.	129	911	MSTRG.16048.1	1	783	MSTRG.16048
j	novel	0.39341	-0.008192	NW_004973486.1	+	380700	385060	MSTRG.16070.2	2	1496	MSTRG.16070
j	novel	0.184613	-0.0753664	NW_004973486.1	+	380706	385060	MSTRG.16070.3	2	3280	MSTRG.16070
u	novel	0.0969102	-0.02048	NW_004973486.1	+	388634	388893	MSTRG.16071.1	1	260	MSTRG.16071
u	novel	0.13875	-0.0704512	NW_004973486.1	+	390997	396817	MSTRG.16073.1	2	993	MSTRG.16073
u	novel	0.12088	-0.07168	NW_004973486.1	.	645719	647851	MSTRG.16086.1	1	2133	MSTRG.16086
i	novel	0.0288929	-0.0004096	NW_004973193.1	.	1427022	1427360	MSTRG.1609.1	1	339	MSTRG.1609
u	novel	0.0147644	-0.073728	NW_004973486.1	-	644482	645277	MSTRG.16090.1	1	796	MSTRG.16090
j	novel	0.236526	-0.0454656	NW_004973486.1	+	671957	674372	MSTRG.16091.4	4	1597	MSTRG.16091
u	novel	0.00487675	-0.053248	NW_004973194.1	.	125191	125393	MSTRG.1611.1	1	203	MSTRG.1611
u	novel	0.28356	-0.0770048	NW_004973194.1	-	51443	119431	MSTRG.1612.1	5	661	MSTRG.1612
u	novel	0.389842	-0.016384	NW_004973194.1	-	51500	119435	MSTRG.1612.2	5	608	MSTRG.1612
u	novel	0.467285	-0.0004096	NW_004973194.1	-	58615	119430	MSTRG.1612.3	5	2803	MSTRG.1612
u	novel	0.0417063	-0.022528	NW_004973486.1	.	895303	898056	MSTRG.16122.1	1	2754	MSTRG.16122
u	novel	0.0441414	-0.024576	NW_004973487.1	.	5486	9686	MSTRG.16123.1	1	4201	MSTRG.16123
u	novel	0.249002	-0.0172032	NW_004973487.1	-	10026	12704	MSTRG.16124.1	2	2590	MSTRG.16124
u	novel	0.0494471	-0.0516096	NW_004973488.1	-	9054	12903	MSTRG.16141.1	3	3742	MSTRG.16141
u	novel	0.0473043	-0.0516096	NW_004973488.1	-	9086	12822	MSTRG.16141.2	2	3672	MSTRG.16141
u	novel	0.467394	-0.0233472	NW_004973194.1	-	178934	215809	MSTRG.1616.1	3	1339	MSTRG.1616
u	novel	0.0765531	-0.004096	NW_004973194.1	-	183633	215593	MSTRG.1616.2	3	545	MSTRG.1616
u	novel	0.0583578	-0.0036864	NW_004973488.1	+	445759	449003	MSTRG.16163.1	2	2397	MSTRG.16163
u	novel	0.121855	-0.0294912	NW_004973488.1	-	456556	472868	MSTRG.16164.1	2	16275	MSTRG.16164
j	novel	0.210126	-0.0131072	NW_004973194.1	-	429769	463778	MSTRG.1617.1	4	3752	MSTRG.1617
j	novel	0.19999	-0.0212992	NW_004973488.1	+	687617	699914	MSTRG.16171.2	5	4472	MSTRG.16171
i	novel	0.310224	-0.0397312	NW_004973488.1	.	1394126	1395038	MSTRG.16184.1	1	913	MSTRG.16184
j	novel	0.120143	-0.0376832	NW_004973194.1	+	467109	484547	MSTRG.1619.1	2	8046	MSTRG.1619
j	novel	0.117028	-0.0376832	NW_004973194.1	+	467109	484548	MSTRG.1619.2	3	7955	MSTRG.1619
i	novel	0.0351799	-0.14336	NW_004973488.1	+	1781623	1783098	MSTRG.16190.1	1	1476	MSTRG.16190
o	novel	0.157631	-0.016384	NW_004973488.1	-	1799769	1872594	MSTRG.16192.1	3	4411	MSTRG.16192
i	novel	0.0182187	-0.032768	NW_004973488.1	.	1972452	1973006	MSTRG.16194.1	1	555	MSTRG.16194
i	novel	0.13296	-0.0004096	NW_004973488.1	.	2009128	2009462	MSTRG.16196.1	1	335	MSTRG.16196
i	novel	0.0623024	-0.0004096	NW_004973488.1	-	2012289	2015211	MSTRG.16197.1	1	2923	MSTRG.16197
i	novel	0.0112781	-0.0004096	NW_004973488.1	.	2026363	2027174	MSTRG.16198.1	1	812	MSTRG.16198
i	novel	0.0983896	-0.004096	NW_004973488.1	.	2034053	2041266	MSTRG.16199.1	1	7214	MSTRG.16199
i	novel	0.0592628	-0.0376832	NW_004973179.1	+	1003971	1012496	MSTRG.162.1	1	8526	MSTRG.162
i	novel	0.0462333	-0.0004096	NW_004973488.1	.	2041664	2042648	MSTRG.16200.1	1	985	MSTRG.16200
i	novel	0.0165317	-0.02048	NW_004973488.1	+	2055805	2062191	MSTRG.16202.1	2	6314	MSTRG.16202
i	novel	0.0318648	-0.012288	NW_004973488.1	-	2063762	2068221	MSTRG.16203.1	1	4460	MSTRG.16203
i	novel	0.0914171	-0.0212992	NW_004973488.1	+	2068313	2071503	MSTRG.16204.1	2	3122	MSTRG.16204
i	novel	0.0213866	-0.479232	NW_004973488.1	.	2091843	2094879	MSTRG.16205.1	1	3037	MSTRG.16205
i	novel	0.0722478	-0.008192	NW_004973488.1	+	2099281	2107821	MSTRG.16206.1	1	8541	MSTRG.16206
i	novel	0.0830984	-0.0241664	NW_004973488.1	-	2152362	2164160	MSTRG.16209.1	2	10819	MSTRG.16209
i	novel	0.0332418	-0.0200704	NW_004973488.1	-	2204351	2206281	MSTRG.16212.1	1	1931	MSTRG.16212
i	novel	0.251884	-0.0425984	NW_004973488.1	+	2294827	2329507	MSTRG.16213.1	1	34681	MSTRG.16213
j	novel	0.033154	-0.165069	NW_004973488.1	+	2760547	2763416	MSTRG.16220.2	4	635	MSTRG.16220
j	novel	0.149136	-0.0606208	NW_004973488.1	+	2760551	2763416	MSTRG.16220.3	3	1496	MSTRG.16220
j	novel	0.0957605	-0.01024	NW_004973488.1	+	3748370	3752322	MSTRG.16242.1	5	1487	MSTRG.16242
j	novel	0.210604	-0.0765952	NW_004973488.1	+	3748447	3751840	MSTRG.16242.2	4	1078	MSTRG.16242
i	novel	0.00529645	-0.0937984	NW_004973194.1	.	862478	862907	MSTRG.1625.1	1	430	MSTRG.1625
u	novel	0.173273	-0.0483328	NW_004973488.1	+	3972305	4005908	MSTRG.16250.1	7	6173	MSTRG.16250
u	novel	0.173273	-0.026624	NW_004973488.1	+	3972313	4004672	MSTRG.16250.2	7	6285	MSTRG.16250
j	novel	0.043718	-0.45056	NW_004973488.1	-	4123045	4124918	MSTRG.16252.10	2	966	MSTRG.16252
j	novel	0.234545	-0.0385024	NW_004973488.1	+	4189204	4198192	MSTRG.16253.1	3	2586	MSTRG.16253
j	novel	0.296917	-0.0385024	NW_004973488.1	+	4189249	4198186	MSTRG.16253.3	3	2331	MSTRG.16253
u	novel	0.0179283	-0.0356352	NW_004973488.1	.	4224657	4226235	MSTRG.16255.1	1	1579	MSTRG.16255
j	novel	0.0830011	-0.0667648	NW_004973488.1	+	4351840	4361597	MSTRG.16264.1	5	3521	MSTRG.16264
i	novel	0.129737	-0.01024	NW_004973488.1	+	4358573	4359530	MSTRG.16265.1	1	958	MSTRG.16265
u	novel	0.0162793	-0.119194	NW_004973488.1	-	4544225	4544427	MSTRG.16269.1	1	203	MSTRG.16269
u	novel	0.0333989	-0.053248	NW_004973488.1	.	4587412	4587685	MSTRG.16271.1	1	274	MSTRG.16271
u	novel	0.0206848	-0.032768	NW_004973488.1	+	4618901	4657589	MSTRG.16273.1	2	458	MSTRG.16273
u	novel	0.0168834	-0.032768	NW_004973488.1	+	4618976	4647213	MSTRG.16273.2	2	308	MSTRG.16273
u	novel	0.0165586	-0.032768	NW_004973488.1	+	4618989	4621675	MSTRG.16273.3	2	313	MSTRG.16273
u	novel	0.0206914	-0.018432	NW_004973488.1	+	4673533	4727961	MSTRG.16274.1	2	260	MSTRG.16274
u	novel	0.194377	-0.0233472	NW_004973488.1	+	4729222	4757120	MSTRG.16275.1	2	2025	MSTRG.16275
u	novel	0.0340004	-0.02048	NW_004973488.1	+	4729284	4766118	MSTRG.16275.2	2	1606	MSTRG.16275
u	novel	0.0585874	-0.032768	NW_004973488.1	-	5052590	5080874	MSTRG.16277.1	5	3168	MSTRG.16277
u	novel	0.0965638	-0.032768	NW_004973488.1	-	5052848	5080859	MSTRG.16277.2	4	2744	MSTRG.16277
u	novel	0.031446	-0.0073728	NW_004973488.1	-	5057797	5080877	MSTRG.16277.3	4	1719	MSTRG.16277
o	novel	0.114298	-0.04096	NW_004973194.1	-	732733	786622	MSTRG.1628.1	2	7040	MSTRG.1628
u	novel	0.135611	-0.03072	NW_004973488.1	+	4829110	4847237	MSTRG.16281.1	2	17586	MSTRG.16281
u	novel	0.120097	-0.016384	NW_004973488.1	+	4841082	4857968	MSTRG.16281.2	5	10027	MSTRG.16281
o	novel	0.0288249	-0.016384	NW_004973488.1	+	4851645	4931360	MSTRG.16281.3	2	1006	MSTRG.16281
u	novel	0.055473	-0.032768	NW_004973488.1	.	5601531	5602216	MSTRG.16286.1	1	686	MSTRG.16286
u	novel	0.115037	-0.138854	NW_004973489.1	.	2812	3501	MSTRG.16287.1	1	690	MSTRG.16287
i	novel	0.0967768	-0.0004096	NW_004973488.1	+	5182912	5183201	MSTRG.16291.1	1	290	MSTRG.16291
o	novel	0.0179353	-0.0253952	NW_004973488.1	+	5240940	5501605	MSTRG.16294.1	2	379	MSTRG.16294
u	novel	0.0204304	-0.0114688	NW_004973194.1	.	1007422	1007686	MSTRG.1630.1	1	265	MSTRG.1630
j	novel	0.0583855	-0.0454656	NW_004973488.1	+	5517496	5523853	MSTRG.16307.2	3	3163	MSTRG.16307
x	novel	0.0274862	-0.12288	NW_004973488.1	-	5541377	5557607	MSTRG.16310.1	2	741	MSTRG.16310
i	novel	0.016365	-0.032768	NW_004973488.1	+	5562596	5562919	MSTRG.16311.1	1	324	MSTRG.16311
i	novel	0.0033834	-0.012288	NW_004973488.1	.	5564447	5564784	MSTRG.16312.1	1	338	MSTRG.16312
i	novel	0.3058	-0.0671744	NW_004973489.1	-	111106	123400	MSTRG.16320.1	2	12230	MSTRG.16320
i	novel	0.156834	-0.0528384	NW_004973489.1	+	245625	249494	MSTRG.16325.1	1	3870	MSTRG.16325
i	novel	0.0910074	-0.004096	NW_004973489.1	-	357031	362692	MSTRG.16332.1	2	5610	MSTRG.16332
u	novel	0.0245731	-0.0159744	NW_004973489.1	-	531642	537077	MSTRG.16336.1	2	5350	MSTRG.16336
u	novel	0.017254	-0.0004096	NW_004973489.1	.	537192	537893	MSTRG.16337.1	1	702	MSTRG.16337
i	novel	0.11974	-0.0065536	NW_004973194.1	+	1080879	1086977	MSTRG.1635.1	2	2100	MSTRG.1635
i	novel	0.239519	-0.016384	NW_004973489.1	+	876357	879907	MSTRG.16350.1	2	3501	MSTRG.16350
i	novel	0.191356	-0.02048	NW_004973489.1	+	883520	886823	MSTRG.16351.1	2	3255	MSTRG.16351
i	novel	0.182509	-0.053248	NW_004973489.1	-	1161430	1167224	MSTRG.16357.1	2	5680	MSTRG.16357
x	novel	0.0033045	-0.0004096	NW_004973489.1	+	1343240	1343524	MSTRG.16363.1	2	265	MSTRG.16363
j	novel	0.0281838	-0.004096	NW_004973489.1	-	1887328	1889788	MSTRG.16369.6	4	1830	MSTRG.16369
j	novel	0.0558962	-0.02048	NW_004973489.1	-	1887983	1889655	MSTRG.16369.7	3	1134	MSTRG.16369
i	novel	0.143143	-0.04096	NW_004973489.1	.	1855300	1855913	MSTRG.16370.1	1	614	MSTRG.16370
j	novel	0.0810402	-0.0004096	NW_004973489.1	+	2037110	2041810	MSTRG.16373.3	3	413	MSTRG.16373
u	novel	0.0155722	-0.0462848	NW_004973489.1	.	3143370	3143665	MSTRG.16380.1	1	296	MSTRG.16380
i	novel	0.289884	-0.0229376	NW_004973489.1	-	2965529	2970803	MSTRG.16384.1	2	5195	MSTRG.16384
j	novel	0.432386	-0.049152	NW_004973489.1	+	3154251	3195827	MSTRG.16385.1	3	3360	MSTRG.16385
[truncated: 8,078 more rows]
